# Supplementary material for: Understanding the Adaptive Growth Strategy of Lactobacillus plantarum by In Silico Optimisation
Source: PLoS Comput Biol. 2009 Jun 12;5(6):e1000410. doi: 10.1371/journal.pcbi.1000410 (PMC2690837; doi:10.1371/journal.pcbi.1000410)
Supplement: Table S1 — Model details. This file contains the abbreviations, reactions and the gene-protein-reaction associations of L. plantarum model v3 used in this study. (0.28 MB XLS) [file pcbi.1000410.s002.xls]

## Sheet: GPRs v3
abbreviation	officialName	equation	EC code	proteinGeneAssociation	geneAssociation	proteinAssociation
2HXICDH	L-2-hydroxyisocaproate dehydrogenase	[c] : 4mop + h + nadh <==> 2hxic-L + nad		( HicD2 (lp_1245) ) or ( HicD3 (lp_2349) ) or ( HicD1 (lp_0350) )	( lp_1245 or lp_2349 or lp_0350 )	( HicD2 ) or ( HicD3 ) or ( HicD1 )
2MBALDH	2-methylbutanal dehydrogenase (acid forming)	[c] : 2mbal + h2o + nad <==> 2mba + (2) h + nadh
2MBALt	2-methylbutanal transport	2mbal[c] <==> 2mbal[e]
2MBAt6	2-methylbutanoic acid transport (H-symport)	2mba[c] + h[c] <==> 2mba[e] + h[e]
2MBDH	2-methylbutanol dehydrogenase	[c] : 2mbal + h + nadh <==> 2mbol + nad
2MBOLt	2-methylbutanol transport	2mbol[c] <==> 2mbol[e]
2MPALDH	2-methylpropanal dehydrogenase (acid forming)	[c] : 2mpal + h2o + nad <==> 2mpa + (2) h + nadh
2MPALt	2-methylpropanal transport	2mpal[c] <==> 2mpal[e]
2MPAt6	2-methylpropanoic acid transport (H-symport)	2mpa[c] + h[c] <==> 2mpa[e] + h[e]
2MPDH	2-methylpropanol dehydrogenase	[c] : 2mpal + h + nadh <==> 2mpol + nad
2MPOLt	2-methylpropanol transport	2mpol[c] <==> 2mpol[e]
2hxict6	L-2-hydroxyisocaproate transport (H+ symport)	2hxic-L[c] + h[c] <==> 2hxic-L[e] + h[e]
3MBALDH	3-methylbutanal dehydrogenase (acid forming)	[c] : 3mbal + h2o + nad <==> 3mba + (2) h + nadh
3MBALt	3-methylbutanal transport	3mbal[c] <==> 3mbal[e]
3MBAt6	3-methylbutanoic acid transport (H-symport)	3mba[c] + h[c] <==> 3mba[e] + h[e]
3MBDH	3-methylbutanol dehydrogenase	[c] : 3mbal + h + nadh <==> 3mbol + nad
3MBOLt	3-methylbutanol transport	3mbol[c] <==> 3mbol[e]
3MOBDC	3-methyl-2-oxobutanoate decarboxylase	[c] : 3mob + h --> 2mpal + co2
3MOPDC	3-methyl-2-oxopentanoate decarboxylase	[c] : 3mop + h --> 2mbal + co2
4MOPDC	4-methyl-2-oxopentanoate decarboxylase	[c] : 4mop + h --> 3mbal + co2
4MT2ODC	4-methylthio 2 oxobutyrate decarboxylase	[c] : 4met2obut --> co2 + methal
AALDH	aryl-alcohol dehydrogenase	[c] : h + nadh + pacald <==> nad + pea	1.1.1.90	Lp_3054 (lp_3054)	lp_3054	Lp_3054
ABTA	4-aminobutyrate transaminase	[c] : 4abut + akg --> glu-L + sucsal	2.6.1.19	GabT (lp_1721)	lp_1721	GabT
ACACT1	acetyl-CoA C-acetyltransferase	[c] : (2) accoa --> aacoa + coa	2.3.1.9
ACALD	acetaldehyde dehydrogenase (acetylating)	[c] : acald + coa + nad <==> accoa + h + nadh	1.2.1.10	( AdhE (lp_3662) ) or ( AcdH (lp_0329) )	( lp_3662 or lp_0329 )	( AdhE ) or ( AcdH )
ACALDt	acetaldehyde reversible transport	acald[e] <==> acald[c]
ACCOAC	acetyl-CoA carboxylase	[c] : accoa + atp + hco3 --> adp + h + malcoa + pi	6.4.1.2	( AccA1 (lp_0592) and AccB1or3 ( lp_0362 ) or ( lp_0589 ) and AccC1 (lp_0590) and AccD1 (lp_0591) and BirA ( lp_0337 ) or ( lp_0854 ) ) or ( AccA2 (lp_1680) and AccB2or3 ( lp_1676 ) or ( lp_0362 ) and AccC2 (lp_1678) and AccD2 (lp_1679) and BirA ( lp_0337 ) or ( lp_0854 ) )	( ( lp_0592 and ( lp_0362 or lp_0589 ) and lp_0590 and lp_0591 and ( lp_0337 or lp_0854 ) ) or ( lp_1680 and ( lp_1676 or lp_0362 ) and lp_1678 and lp_1679 and ( lp_0337 or lp_0854 ) ) )	( AccA1 and AccB1or3 and AccC1 and AccD1 and BirA ) or ( AccA2 and AccB2or3 and AccC2 and AccD2 and BirA )
ACGALpts	N-acetylgalactosamine PTS	acgala[e] + pep[c] --> acgal6p[c] + pyr[c]		( EII_acgal ( lp_2647 and lp_2648 and lp_2649 and lp_2650 ) and Hpr (lp_1273) and PtsI (lp_1274) )	( ( lp_2647 and lp_2648 and lp_2649 and lp_2650 ) and lp_1273 and lp_1274 )	( EII_acgal and Hpr and PtsI )
ACGAMT	UDP-N-acetylglucosamine:undecaprenylphosphate N-acetylglucosamine -1-phosphate transferase	[c] : uacgam + udcpp --> ump + unaga		TagO (lp_0730)	lp_0730	TagO
ACGApts	N-Acetyl-D-glucosamine transport via PEP:Pyr PTS	acgam[e] + pep[c] --> acgam6p[c] + pyr[c]		( EII_acga_glc (lp_2531) and Hpr (lp_1273) and PtsI (lp_1274) ) or ( EII_acga (lp_2969) and Hpr (lp_1273) and PtsI (lp_1274) )	( ( lp_2531 and lp_1273 and lp_1274 ) or ( lp_2969 and lp_1273 and lp_1274 ) )	( EII_acga_glc and Hpr and PtsI ) or ( EII_acga and Hpr and PtsI )
ACGK	acetylglutamate kinase	[c] : acglu + atp --> acg5p + adp	2.7.2.8	( ArgB (lp_0530) ) or ( ArgEB (lp_0488) )	( lp_0530 or lp_0488 )	( ArgB ) or ( ArgEB )
ACHBS	2-aceto-2-hydroxybutanoate synthase	[c] : 2obut + h + pyr --> 2ahbut + co2		AlsS (lp_1005)	lp_1005	AlsS
ACKr	acetate kinase	[c] : ac + atp <==> actp + adp	2.7.2.1	ACKr ( lp_2242 ) or ( lp_0210 ) or ( lp_0310 )	( lp_2242 or lp_0210 or lp_0310 )	ACKr
ACLDC	acetolactate decarboxylase	[c] : alac-S + h --> actn-R + co2	4.1.1.5	AlsD (lp_2030)	lp_2030	AlsD
ACLS	acetolactate synthase (Also catalyzes ACHBS)	[c] : h + (2) pyr --> alac-S + co2	4.1.3.18	AlsS (lp_1005)	lp_1005	AlsS
ACNML	N-Acetylneuraminate lyase	[c] : acnam --> acmana + pyr	4.1.3.3	NanA (lp_3568)	lp_3568	NanA
ACODA	acetylornithine deacetylase	[c] : acorn + h2o --> ac + orn-L	3.5.1.16	ArgEB (lp_0488)	lp_0488	ArgEB
ACOTA	acetylornithine transaminase	[c] : acorn + akg <==> acg5sa + glu-L	2.6.1.11	ArgD (lp_0531)	lp_0531	ArgD
ACPS2	acyl-carrier protein synthase	[c] : apoACP + coa --> acp + h + pap	2.7.8.7	( AcpA1 (lp_1629) and AcpS (lp_0522) ) or ( AcpA2 (lp_1672) and AcpS (lp_0522) )	( ( lp_1629 and lp_0522 ) or ( lp_1672 and lp_0522 ) )	( AcpA1 and AcpS ) or ( AcpA2 and AcpS )
ACTNdiff	(R)-acetoin diffusion	actn-R[e] <==> actn-R[c]
ACTPASE	acylphosphatase	[c] : actp + h2o --> ac + h + pi	3.6.1.7	P_3.6.1.7 (lp_1554)	lp_1554	P_3.6.1.7
ACt6	acetate transport in/out via proton symport	ac[e] + h[e] <==> ac[c] + h[c]
ADA	Adenosine deaminase	[c] : adn + h + h2o --> ins + nh4	3.5.4.4	Lp_0696 (lp_0696)	lp_0696	Lp_0696
ADCL	4-aminobenzoate synthase	[c] : 4adcho --> 4abz + h + pyr
ADCS	4-amino-4-deoxychorismate synthase	[c] : chor + gln-L --> 4adcho + glu-L
ADD	adenine deaminase	[c] : ade + h + h2o --> hxan + nh4	3.5.4.2	AdeC (lp_3334)	lp_3334	AdeC
ADEt2	adenine transport via proton symport (reversible)	ade[e] + h[e] <==> ade[c] + h[c]		Lp_3374 (lp_3374)	lp_3374	Lp_3374
ADK1	adenylate kinase	[c] : amp + atp <==> (2) adp	2.7.4.3	Adk (lp_1058)	lp_1058	Adk
ADK2	adenylate kinase (Inorganic triphosphate)	[c] : amp + pppi <==> adp + ppi	2.7.4.3	Adk (lp_1058)	lp_1058	Adk
ADPDS	acetyl-diaminopimelate deacetylase	[c] : al26da + h + h2o --> 26dap-LL + ac	3.5.1.47	Lp_2263 (lp_2263)	lp_2263	Lp_2263
ADPRDP	ADPribose diphosphatase	[c] : adprib + h2o --> amp + (2) h + r5p	3.6.1.13	( Lp_1790 (lp_1790) ) or ( Lp_2762 (lp_2762) ) or ( Lp_2183 (lp_2183) )	( lp_1790 or lp_2762 or lp_2183 )	( Lp_1790 ) or ( Lp_2762 ) or ( Lp_2183 )
ADPT	adenine phosphoribosyltransferase	[c] : ade + prpp --> amp + ppi	2.4.2.7	Apt (lp_2086)	lp_2086	Apt
ADPTA	acetyldiaminopimelate transaminase	[c] : akg + al26da + h <==> acamoxm + glu-L
ADSK	adenylyl-sulfate kinase	[c] : aps + atp --> adp + h + paps	2.7.1.25	CysC (lp_1379)	lp_1379	CysC
ADSL1	adenylosuccinate lyase	[c] : dcamp --> amp + fum	4.3.2.2	PurB (lp_3269)	lp_3269	PurB
ADSL2	adenylosuccinate lyase	[c] : 25aics --> aicar + fum	4.3.2.2	PurB (lp_3269)	lp_3269	PurB
ADSS	adenylosuccinate synthetase	[c] : asp-L + gtp + imp --> dcamp + gdp + (2) h + pi	6.3.4.4	PurA (lp_3270)	lp_3270	PurA
AEPPT	2-aminoethylphosphonate-pyruvate transaminase	[c] : 2aeppn + pyr --> ala-L + ppaca	2.6.1.37	PhnW (lp_0710)	lp_0710	PhnW
AEPabc	2-Aminoethyl phosphonate (AEP) transport via ABC system	2aeppn[e] + atp[c] + h2o[c] --> 2aeppn[c] + adp[c] + h[c] + pi[c]		( PhnC (lp_0714) and PhnD (lp_0715) and PhnE2 (lp_0713) ) or ( PhnC (lp_0714) and PhnD (lp_0715) and PhnE1 (lp_0712) )	( ( lp_0714 and lp_0715 and lp_0713 ) or ( lp_0714 and lp_0715 and lp_0712 ) )	( PhnC and PhnD and PhnE2 ) or ( PhnC and PhnD and PhnE1 )
AGAT_LPL	1-Acyl-glycerol-3-phosphate acyltransferase (Lb plantarum specific)	[c] : (0.12) 2chdeacp + (0.32) 2cocdacp + (0.01) agly3p_LPL + (0.25) cpocdacp + (0.26) hdeacp + (0.02) ocdacp + (0.03) tdeacp --> acp + (0.01) pa_LPL	2.3.1.51	PlsC (lp_2060)	lp_2060	PlsC
AGDC	N-acetylglucosamine-6-phosphate deacetylase	[c] : acgam6p + h2o --> ac + gam6p	3.5.1.25	NagA (lp_0562)	lp_0562	NagA
AGPR	N-acetyl-g-glutamyl-phosphate reductase	[c] : acg5sa + nadp + pi <==> acg5p + h + nadph	1.2.1.38	( ArgC2 (lp_0528) ) or ( ArgC1 (lp_0487) )	( lp_0528 or lp_0487 )	( ArgC2 ) or ( ArgC1 )
AHCYSNS	adenosylhomocysteine nucleosidase	[c] : ahcys + h2o --> ade + rhcys	3.2.2.9	Mtn (lp_2181)	lp_2181	Mtn
AHMMPS	4-amino-5-hydroxymethyl-2-methylpyrimidine synthetase	[c] : air + h2o --> 4ahmmp + gcald + (0.5) o2 + pi		( ApbE3 (lp_3492) ) or ( ApbE1 (lp_1072) ) or ( ApbE2 (lp_2936) )	( lp_3492 or lp_1072 or lp_2936 )	( ApbE3 ) or ( ApbE1 ) or ( ApbE2 )
AICART	phosphoribosylaminoimidazolecarboxamide formyltransferase	[c] : 10fthf + aicar <==> fprica + thf	2.1.2.3	PurH (lp_2720)	lp_2720	PurH
AIRC	phosphoribosylaminoimidazole carboxylase	[c] : air + co2 --> 5aizc + h	4.1.1.21	( PurEK1 ( lp_2728 and lp_2729 ) ) or ( PurEK2 ( lp_1141 and lp_2729 ) )	( ( lp_2728 and lp_2729 ) or ( lp_1141 and lp_2729 ) )	( PurEK1 ) or ( PurEK2 )
AKGTA3	aromatic-amino-acid transaminase (Trp: aKG)	[c] : akg + trp-L <==> glu-L + indpyr	2.6.1.27	( AraT1 (lp_1280) ) or ( AraT2 (lp_2684) )	( lp_1280 or lp_2684 )	( AraT1 ) or ( AraT2 )
ALALAC	D-alanine-D-lactate ligase (reversible)	[c] : ala-D + atp + lac-D <==> adp + alalac + pi		DdlA (lp_2345)	lp_2345	DdlA
ALAR	alanine racemase	[c] : ala-L <==> ala-D	5.1.1.1	Alr (lp_0523)	lp_0523	Alr
ALATA_L	L-alanine transaminase	[c] : akg + ala-L <==> glu-L + pyr	2.6.1.2
ALATA_Lr	alanine transaminase	[c] : ala-L + pydx <==> h + pydam + pyr	2.6.1.30
ALATRS	Alanyl-tRNA synthetase	[c] : ala-L + atp + trnaala --> alatrna + amp + h + ppi	6.1.1.7	AlaS (lp_2277)	lp_2277	AlaS
ALA_Lt6	L-alanine transport in/out via proton symport	ala-L[e] + h[e] <==> ala-L[c] + h[c]
ALCD19	alcohol dehydrogenase (glycerol)	[c] : glyald + h + nadh <==> glyc + nad	1.1.1.1	( Adh2 (lp_2873) ) or ( Adh1 (lp_1665) )	( lp_2873 or lp_1665 )	( Adh2 ) or ( Adh1 )
ALCD2x	alcohol dehydrogenase (ethanol: NAD)	[c] : etoh + nad <==> acald + h + nadh	1.1.1.1	( Adh2 (lp_2873) ) or ( Adh1 (lp_1665) ) or ( AdhE (lp_3662) )	( lp_2873 or lp_1665 or lp_3662 )	( Adh2 ) or ( Adh1 ) or ( AdhE )
ALDD2x	aldehyde dehydrogenase (acetaldehyde, NAD)	[c] : acald + h2o + nad --> ac + (2) h + nadh	1.2.1.3	AldH (lp_0047)	lp_0047	AldH
ALDD8x	aldehyde dehydrogenase (D-glyceraldehyde, NAD)	[c] : glyald + h2o + nad --> glyc-R + (2) h + nadh	1.2.1.3	AldH (lp_0047)	lp_0047	AldH
ALKP	alkaline phosphatase	[c] : dhap + h2o --> dha + pi	3.1.3.1
ALOX	oxidative decarboxylation of acetolacate (chemical)	[c] : alac-S + h + (0.5) o2 --> co2 + diact + h2o
AMAA	N-acetylmuramoyl-L-alanine amidase	[c] : acmama + h2o --> acmam + ala-L	3.5.1.28	P_3.5.1.28 (lp_1982)	lp_1982	P_3.5.1.28
AMANAPE	N-acetylmannosamine 6-phoshpate epimerase	[c] : acmanap --> acgam6p		NanE (lp_3571)	lp_3571	NanE
AMANK	N-acetyl-D-mannosamine kinase	[c] : acmana + atp --> acmanap + adp + h	2.7.1.60	Lp_3567 (lp_3567)	lp_3567	Lp_3567
ANPRT	anthranilate phosphoribosyltransferase	[c] : anth + prpp --> ppi + pran	2.4.2.18	TrpD (lp_1654)	lp_1654	TrpD
ANS1	anthranilate synthase	[c] : chor + gln-L --> anth + glu-L + h + pyr	4.1.3.27	( TrpE (lp_1652) and TrpG (lp_1653) )	( lp_1652 and lp_1653 )	( TrpE and TrpG )
APAT	apolipoprotein N-acyl transferase	[c] : accoa + h2o + thdp <==> acamoxm + coa	2.3.1.89	DapD (lp_2264)	lp_2264	DapD
ARAB-Lt	L-arabinoase extracellular transport	arab-L[e] <==> arab-L[c]		AraT (lp_3557)	lp_3557	AraT
ARAI	L-arabinose isomerase	[c] : arab-L <==> rbl-L	5.3.1.4	AraA (lp_3554)	lp_3554	AraA
ARGSL	argininosuccinate lyase	[c] : argsuc <==> arg-L + fum	4.3.2.1	ArgH (lp_0776)	lp_0776	ArgH
ARGSS	argininosuccinate synthase	[c] : asp-L + atp + citr-L --> amp + argsuc + h + ppi	6.3.4.5	ArgG (lp_0775)	lp_0775	ArgG
ARGTRS	Arginyl-tRNA synthetase	[c] : arg-L + atp + trnaarg --> amp + argtrna + h + ppi	6.1.1.19	ArgS (lp_1391)	lp_1391	ArgS
ARGt	L-arginine transport in via proton symport	arg-L[e] + h[e] <==> arg-L[c] + h[c]
ASAD	aspartate-semialdehyde dehydrogenase	[c] : aspsa + nadp + pi <==> 4pasp + h + nadph	1.2.1.11	( Asd2 (lp_2570) ) or ( Asd1 (lp_1346) )	( lp_2570 or lp_1346 )	( Asd2 ) or ( Asd1 )
ASNN	L-asparaginase	[c] : asn-L + h2o --> asp-L + nh4	3.5.1.1	P_3.5.1.1 (lp_2738)	lp_2738	P_3.5.1.1
ASNS1	asparagine synthase (glutamine-hydrolysing)	[c] : asp-L + atp + gln-L + h2o --> amp + asn-L + glu-L + h + ppi	6.3.5.4	( AsnB1 (lp_0980) ) or ( AsnB2 (lp_3085) )	( lp_0980 or lp_3085 )	( AsnB1 ) or ( AsnB2 )
ASNS2	asparagine synthetase	[c] : asp-L + atp + nh4 --> amp + asn-L + h + ppi	6.3.1.1	AsnA (lp_0957)	lp_0957	AsnA
ASNTRS	Asparaginyl-tRNA synthetase	[c] : asn-L + atp + trnaasn --> amp + asntrna + h + ppi	6.1.1.22	( AsnS2 (lp_1740) ) or ( AsnS1 (lp_0956) )	( lp_1740 or lp_0956 )	( AsnS2 ) or ( AsnS1 )
ASNt6	L-asparagine transport in/out via proton symport	asn-L[e] + h[e] <==> asn-L[c] + h[c]
ASP1DC	aspartate 1-decarboxylase	[c] : asp-L + h --> ala-B + co2	4.1.1.11	PanD (lp_0579)	lp_0579	PanD
ASPCT	aspartate carbamoyltransferase	[c] : asp-L + cbp --> cbasp + h + pi	2.1.3.2	PyrB (lp_2703)	lp_2703	PyrB
ASPK	aspartate kinase	[c] : asp-L + atp <==> 4pasp + adp	2.7.2.4	( ThrA1 (lp_0979) ) or ( ThrA2 (lp_2308) )	( lp_0979 or lp_2308 )	( ThrA1 ) or ( ThrA2 )
ASPR	aspartase racemase	[c] : asp-D <==> asp-L	5.1.1.13	RacD (lp_1523)	lp_1523	RacD
ASPT	L-aspartase	[c] : asp-L --> fum + nh4	4.3.1.1	AnsB (lp_2830)	lp_2830	AnsB
ASPTA1	aspartate transaminase	[c] : akg + asp-L <==> glu-L + oaa	2.6.1.1	AspB1 (lp_1739)	lp_1739	AspB1
ASPTA2	aspartate transaminase	[c] : 4hglu + akg <==> 4h2oxg + glu-L	2.6.1.1	AspB1 (lp_1739)	lp_1739	AspB1
ASPTA4	aspartate transaminase	[c] : akg + cys-L + h <==> glu-L + mercppyr	2.6.1.1	AspB1 (lp_1739)	lp_1739	AspB1
ASPTA5	aspartate transaminase	[c] : akg + tyr-L <==> 34hpp + glu-L	2.6.1.1	( AraT1 (lp_1280) ) or ( AraT2 (lp_2684) ) or ( AspB1 (lp_1739) )	( lp_1280 or lp_2684 or lp_1739 )	( AraT1 ) or ( AraT2 ) or ( AspB1 )
ASPTA6	aspartate transaminase	[c] : akg + phe-L <==> glu-L + phpyr	2.6.1.1	( AraT1 (lp_1280) ) or ( AraT2 (lp_2684) ) or ( AspB1 (lp_1739) )	( lp_1280 or lp_2684 or lp_1739 )	( AraT1 ) or ( AraT2 ) or ( AspB1 )
ASPTRS	Aspartyl-tRNA synthetase	[c] : asp-L + atp + trnaasp --> amp + asptrna + h + ppi	6.1.1.12	AspS (lp_1980)	lp_1980	AspS
ASPt6	L-aspartate transport in via proton symport	asp-L[e] + h[e] <==> asp-L[c] + h[c]
ATPM	ATP maintenance requirment	[c] : atp + h2o --> adp + h + pi
ATPPRT	ATP phosphoribosyltransferase	[c] : atp + prpp --> ppi + prbatp	2.4.2.17	HisG (lp_2560)	lp_2560	HisG
ATPS3r	ATP synthase (three protons for one ATP)	adp[c] + (3) h[e] + pi[c] <==> atp[c] + (2) h[c] + h2o[c]	3.6.3.14	AtpABCDEFGHI ( lp_2363 and lp_2364 and lp_2365 and lp_2366 and lp_2367 and lp_2368 and lp_2369 and lp_2370 )	( lp_2363 and lp_2364 and lp_2365 and lp_2366 and lp_2367 and lp_2368 and lp_2369 and lp_2370 )	AtpABCDEFGHI
BTDD-RR	(R,R)-butanediol dehydrogenase	[c] : btd-RR + nad <==> actn-R + h + nadh	1.1.1.4
BTDt1-RR	(R,R)-butanediol transport in/out via diffusion reversible	btd-RR[c] <==> btd-RR[e]
BTMAT1	Butyryl-[acyl-carrier protein]:malonyl-CoA C-acyltransferase	[c] : 2beacp + h + nadh --> butacp + nad	1.3.1.10	FabI (lp_1681)	lp_1681	FabI
BTNt2i	Biotin uptake	btn[e] + h[e] --> btn[c] + h[c]
BZALt	benzaldehyde transport	bzal[c] <==> bzal[e]
CAT	catalase	[c] : (2) h2o2 --> (2) h2o + o2	1.11.1.6	Kat (lp_3578)	lp_3578	Kat
CBPS	carbamoyl-phosphate synthase (glutamine-hydrolysing)	[c] : (2) atp + gln-L + h2o + hco3 --> (2) adp + cbp + glu-L + (2) h + pi	6.3.5.5	( PyrAAB ( lp_2700 and lp_2701 ) ) or ( CarAB ( lp_0526 and lp_0527 ) )	( ( lp_2700 and lp_2701 ) or ( lp_0526 and lp_0527 ) )	( PyrAAB ) or ( CarAB )
CDPMEK	4-(cytidine 5'-diphospho)-2-C-methyl-D-erythritol kinase	[c] : 4c2me + atp --> 2p4c2me + adp + h		IspE (lp_0460)	lp_0460	IspE
CELBpts	cellobiose transport via PEP:Pyr PTS	cellb[e] + pep[c] --> 6pgg[c] + pyr[c]		( EII_celb ( lp_3008 and lp_3009 and lp_3010 ) or ( lp_2780 and lp_2781 ) and Hpr (lp_1273) and PtsI (lp_1274) ) or ( Hpr (lp_1273) and PtsI (lp_1274) )	( ( ( ( lp_3008 and lp_3009 and lp_3010 ) or ( lp_2780 and lp_2781 ) ) and lp_1273 and lp_1274 ) or ( lp_1273 and lp_1274 ) )	( EII_celb and Hpr and PtsI ) or ( Hpr and PtsI )
CFAS180	cyclopropane fatty acid synthase (n18:0)	[c] : 2cocdacp + amet --> ahcys + cpocdacp + h	2.1.1.79	( Cfa2 (lp_3174) ) or ( Cfa1 (lp_1696) )	( lp_3174 or lp_1696 )	( Cfa2 ) or ( Cfa1 )
CGPT	CDP-glycerol glycerophosphotransferase	[c] : cdpglyc + unagama --> cmp + h + unagamagp	2.7.8.12	( TagF1 (lp_0268) ) or ( TagF2 (lp_0269) )	( lp_0268 or lp_0269 )	( TagF1 ) or ( TagF2 )
CHLabc	choline transport via ABC system	atp[c] + chol[e] + h2o[c] --> adp[c] + chol[c] + h[c] + pi[c]		( ChoQS ( lp_0367 and lp_0368 ) ) or ( OpuABCD ( lp_1607 and lp_1608 and lp_1609 and lp_1610 ) )	( ( lp_0367 and lp_0368 ) or ( lp_1607 and lp_1608 and lp_1609 and lp_1610 ) )	( ChoQS ) or ( OpuABCD )
CHLt6	choline transport in/out via proton symport	chol[e] + h[e] <==> chol[c] + h[c]		Lp_3324 (lp_3324)	lp_3324	Lp_3324
CHORM	chorismate mutase	[c] : chor --> pphn	5.4.99.5	AroA1 (lp_1085)	lp_1085	AroA1
CHORS	chorismate synthase	[c] : 3psme --> chor + pi	4.2.3.5	AroF (lp_2037)	lp_2037	AroF
CITL	Citrate lyase	[c] : cit --> ac + oaa	4.1.3.6	CitCDEFGX ( lp_1093 and lp_1106 and lp_1107 and lp_1108 and lp_1109 and lp_1114 )	( lp_1093 and lp_1106 and lp_1107 and lp_1108 and lp_1109 and lp_1114 )	CitCDEFGX
CITt6	citrate transport in/out via proton symport	cit[e] + h[e] <==> cit[c] + h[c]		MleP1 (lp_0594)	lp_0594	MleP1
CLPNS_LPL	Cardiolipin Synthase (LPL specific)	[c] : (0.02) pg_LPL <==> (0.01) clpn_LPL + glyc		Cls (lp_3273)	lp_3273	Cls
CMLDC	4-carboxymuconolactone decarboxylase	[c] : 2c25dho --> 5odhf2a + co2 + h	4.1.1.44	P_4.1.1.44 (lp_2852)	lp_2852	P_4.1.1.44
CMPDC	p-coumaric acid decarboxylase	[c] : 4coum + h --> 4vcoum + co2		PadA (lp_3665)	lp_3665	PadA
CO2t	CO2 transport out via diffusion	co2[e] <==> co2[c]
CPSS_LPL	CPS synthase complex, LPL specific	[c] : dtdp6dm + (5) h2o + (2) udpg + (2) udpgal <==> CPS_LPL + dtdp + (6) h + (3) udp + ump		( Cps1 ( lp_1177 and lp_1178 and lp_1179 and lp_1180 and lp_1181 and lp_1182 and lp_1183 and lp_1184 and lp_1185 ) ) or ( Cps2 ( lp_1197 and lp_1198 and lp_1199 and lp_1201 and lp_1202 and lp_1203 and lp_1204 and lp_1205 and lp_1206 ) ) or ( Cps3 ( lp_1215 and lp_1216 and lp_1220 and lp_1221 and lp_1222 and lp_1224 and lp_1225 and lp_1226 and lp_1227 ) ) or ( Cps4 ( lp_2099 and lp_2100 and lp_210…	( ( lp_1177 and lp_1178 and lp_1179 and lp_1180 and lp_1181 and lp_1182 and lp_1183 and lp_1184 and lp_1185 ) or ( lp_1197 and lp_1198 and lp_1199 and lp_1201 and lp_1202 and lp_1203 and lp_1204 and lp_1205 and lp_1206 ) or ( lp_1215 and lp_1216 and lp_1220 and lp_1221 and lp_1222 and lp_1224 and lp_1225 and lp_1226 and lp_1227 ) or ( lp_2099 and lp_2100 and lp_2101 and lp_2102 and lp_2103 and lp…	( Cps1 ) or ( Cps2 ) or ( Cps3 ) or ( Cps4 )
CPSS_LPL2	CPS synthase complex, LPL specific	[c] : (2) dtdp6dm + (4) h2o + udpg + udpgal <==> CPS_LPL2 + (2) dtdp + (5) h + udp + ump		( Cps1 ( lp_1177 and lp_1178 and lp_1179 and lp_1180 and lp_1181 and lp_1182 and lp_1183 and lp_1184 and lp_1185 ) ) or ( Cps2 ( lp_1197 and lp_1198 and lp_1199 and lp_1201 and lp_1202 and lp_1203 and lp_1204 and lp_1205 and lp_1206 ) ) or ( Cps3 ( lp_1215 and lp_1216 and lp_1220 and lp_1221 and lp_1222 and lp_1224 and lp_1225 and lp_1226 and lp_1227 ) ) or ( Cps4 ( lp_2099 and lp_2100 and lp_210…	( ( lp_1177 and lp_1178 and lp_1179 and lp_1180 and lp_1181 and lp_1182 and lp_1183 and lp_1184 and lp_1185 ) or ( lp_1197 and lp_1198 and lp_1199 and lp_1201 and lp_1202 and lp_1203 and lp_1204 and lp_1205 and lp_1206 ) or ( lp_1215 and lp_1216 and lp_1220 and lp_1221 and lp_1222 and lp_1224 and lp_1225 and lp_1226 and lp_1227 ) or ( lp_2099 and lp_2100 and lp_2101 and lp_2102 and lp_2103 and lp…	( Cps1 ) or ( Cps2 ) or ( Cps3 ) or ( Cps4 )
CRCT	CTP:D-ribitol-5-phosphate cytidylyltransferase	[c] : ctp + h + rbt5p --> cdprbtl + ppi	2.7.7.40	Lp_1816 (lp_1816)	lp_1816	Lp_1816
CRPT_25	CDP-ribitol phosphoribitoltransferase (25 units with ribitol-P)	[c] : (25) cdprbtl + unagamagp --> (25) cmp + (25) h + unRTA		( TagB1 (lp_1818) and TagGH ( lp_0343 and lp_0344 ) ) or ( TagB2 (lp_1819) and TagGH ( lp_0343 and lp_0344 ) ) or ( TagB3 (lp_1977) and TagGH ( lp_0343 and lp_0344 ) )	( ( lp_1818 and ( lp_0343 and lp_0344 ) ) or ( lp_1819 and ( lp_0343 and lp_0344 ) ) or ( lp_1977 and ( lp_0343 and lp_0344 ) ) )	( TagB1 and TagGH ) or ( TagB2 and TagGH ) or ( TagB3 and TagGH )
CSND	Cytosine deaminase	[c] : csn + h + h2o --> nh4 + ura	3.5.4.1	Lp_0696 (lp_0696)	lp_0696	Lp_0696
CSNt6	cytosine transport in/out via proton symporter	csn[e] + h[e] <==> csn[c] + h[c]		Lp_3374 (lp_3374)	lp_3374	Lp_3374
CTPS1_#1	CTP synthase (NH3)	[c] : atp + nh4 + utp --> adp + ctp + (2) h + pi	6.3.4.2	PyrG (lp_0481)	lp_0481	PyrG
CTPS2	CTP synthase (glutamine)	[c] : atp + gln-L + h2o + utp --> adp + ctp + glu-L + (2) h + pi	6.3.4.2	PyrG (lp_0481)	lp_0481	PyrG
CYSS	cysteine synthase	[c] : acser + h2s --> ac + cys-L + h	4.2.99.8	CysK (lp_0256)	lp_0256	CysK
CYSTGL	cystathionine g-lyase	[c] : cysth-L + h2o --> 2obut + cys-L + nh4	4.4.1.1	( MetC2 (lp_3517) ) or ( MetC1 (lp_0255) )	( lp_3517 or lp_0255 )	( MetC2 ) or ( MetC1 )
CYSTL	cystathionine b-lyase	[c] : cysth-L + h2o --> hcys-L + nh4 + pyr	4.4.1.8	( MetC1 (lp_0255) ) or ( MetC2 (lp_3517) )	( lp_0255 or lp_3517 )	( MetC1 ) or ( MetC2 )
CYSTRS	Cysteinyl-tRNA synthetase	[c] : atp + cys-L + trnacys --> amp + cystrna + h + ppi	6.1.1.16	CysS (lp_0610)	lp_0610	CysS
CYSt6	L-cysteine transport in via proton symport	cys-L[e] + h[e] <==> cys-L[c] + h[c]
CYTB_B2	menaquinol oxidase (7:1 protons)	(2) h[c] + mql7[c] + (0.5) o2[c] --> (2) h[e] + h2o[c] + mqn7[c]		( CydAB ( lp_1125 and lp_1126 ) and CydC (lp_1128) and CydD (lp_1129) )	( ( lp_1125 and lp_1126 ) and lp_1128 and lp_1129 )	( CydAB and CydC and CydD )
CYTDK1	cytidine kinase (ATP)	[c] : atp + cytd --> adp + cmp + h		Udk (lp_1562)	lp_1562	Udk
CYTDK2	cytidine kinase (GTP)	[c] : cytd + gtp --> cmp + gdp + h		Udk (lp_1562)	lp_1562	Udk
CYTDK3	cytidine kinase (ITP)	[c] : cytd + itp --> cmp + h + idp		Udk (lp_1562)	lp_1562	Udk
CYTK1	cytidylate kinase (CMP)	[c] : atp + cmp <==> adp + cdp	2.7.4.14	Cmk (lp_1883)	lp_1883	Cmk
CYTK2	cytidylate kinase (dCMP)	[c] : atp + dcmp <==> adp + dcdp	2.7.4.14	Cmk (lp_1883)	lp_1883	Cmk
D-LACt2	D-lactate transport via proton symport	h[e] + lac-D[e] <==> h[c] + lac-D[c]		GlcA (lp_1814)	lp_1814	GlcA
DADNK	deoxyadenosine kinase	[c] : atp + dad-2 --> adp + damp + h	2.7.1.76	( Dgk2 (lp_1329) ) or ( Dgk1 (lp_1011) )	( lp_1329 or lp_1011 )	( Dgk2 ) or ( Dgk1 )
DAGGT_LPL	1,2-diacylglycerol 3-glucosyltransferase (LPL specific)	[c] : (0.01) dag_LPL + (2) udpg --> (0.01) dgdag_LPL + (2) h + (2) udp	2.4.1.157	Daggt ( lp_1275 and lp_1276 )	( lp_1275 and lp_1276 )	Daggt
DAGK_LPL	Diacylglycerol kinase (LPL specific)	[c] : atp + (0.01) dag_LPL --> adp + h + (0.01) pa_LPL	2.7.1.107	Dgk (lp_1968)	lp_1968	Dgk
DAHPS	3-deoxy-D-arabino-heptulosonate 7-phosphate synthetase	[c] : e4p + h2o + pep --> 2dda7p + pi	4.1.2.15	AroA1 (lp_1085)	lp_1085	AroA1
DALTAL	D-Alanine lipoteichoic acid ligase	[c] : (0.01) LTA_LPL + (25) ala-D + (25) atp --> (0.01) LTAala_LPL + (25) adp + (25) pi	6.3.2.16	( DltA (lp_2019) and DltB (lp_2018) and DltC1 (lp_2017) and DltD (lp_2016) ) or ( DltA (lp_2019) and DltB (lp_2018) and DltC2 (lp_1406) and DltD (lp_2016) )	( ( lp_2019 and lp_2018 and lp_2017 and lp_2016 ) or ( lp_2019 and lp_2018 and lp_1406 and lp_2016 ) )	( DltA and DltB and DltC1 and DltD ) or ( DltA and DltB and DltC2 and DltD )
DAPDC	diaminopimelate decarboxylase	[c] : 26dap-M + h --> co2 + lys-L	4.1.1.20	LysA (lp_1713)	lp_1713	LysA
DAPE	diaminopimelate epimerase	[c] : 26dap-LL <==> 26dap-M	5.1.1.7	DapF (lp_2185)	lp_2185	DapF
DARTAL	D-Alanine ribitol teichoic acid ligase	[c] : RTA + (25) ala-D + (25) atp --> RTAala + (25) adp + (25) pi		( DltA (lp_2019) and DltB (lp_2018) and DltC1 (lp_2017) and DltD (lp_2016) ) or ( DltA (lp_2019) and DltB (lp_2018) and DltC2 (lp_1406) and DltD (lp_2016) )	( ( lp_2019 and lp_2018 and lp_2017 and lp_2016 ) or ( lp_2019 and lp_2018 and lp_1406 and lp_2016 ) )	( DltA and DltB and DltC1 and DltD ) or ( DltA and DltB and DltC2 and DltD )
DASYN_LPL	CDP-Diacylglycerol synthetase (LPL specific)	[c] : ctp + h + (0.01) pa_LPL <==> (0.01) cdpdag_LPL + ppi	2.7.7.41	CdsA (lp_2050)	lp_2050	CdsA
DB4PS	3,4-Dihydroxy-2-butanone-4-phosphate	[c] : ru5p-D --> db4p + for + h		RibA (lp_1437)	lp_1437	RibA
DDGLK	2-dehydro-3-deoxygluconokinase	[c] : 2ddglcn + atp --> 2ddg6p + adp + h	2.7.1.45	KdgK (lp_0253)	lp_0253	KdgK
DDMAT5	Dodecanoyl-[acyl-carrier protein]: malonyl-CoA C-acyltransferase	[c] : 2tddacp + h + nadh --> ddeacp + nad	1.3.1.10	FabI (lp_1681)	lp_1681	FabI
DEMAT4	Decanoyl-[acyl-carrier protein]:malonyl-CoA C-acyltransferase	[c] : 2tdeacp + h + nadh --> decacp + nad	1.3.1.10	FabI (lp_1681)	lp_1681	FabI
DGNSK	deoxyguanosine kinase	[c] : atp + dgsn --> adp + dgmp + h	2.7.1.113	( Dgk1 (lp_1011) ) or ( Dgk2 (lp_1329) )	( lp_1011 or lp_1329 )	( Dgk1 ) or ( Dgk2 )
DHAPT	Dihydroxyacetone phosphotransferase	[c] : dha + pep --> dhap + pyr		( Dak12A ( lp_0166 and lp_0169 ) and Dak3 (lp_0170) and Hpr (lp_1273) and PtsI (lp_1274) ) or ( Dak12B ( lp_0168 and lp_0169 ) and Dak3 (lp_0170) and Hpr (lp_1273) and PtsI (lp_1274) )	( ( ( lp_0166 and lp_0169 ) and lp_0170 and lp_1273 and lp_1274 ) or ( ( lp_0168 and lp_0169 ) and lp_0170 and lp_1273 and lp_1274 ) )	( Dak12A and Dak3 and Hpr and PtsI ) or ( Dak12B and Dak3 and Hpr and PtsI )
DHAt	Dihydroxyacetone transport via facilitated diffusion	dha[e] <==> dha[c]		GlpF2 (lp_0171)	lp_0171	GlpF2
DHDPRy	dihydrodipicolinate reductase (NADPH)	[c] : 23dhdp + h + nadph --> nadp + thdp	1.3.1.26	DapB (lp_1874)	lp_1874	DapB
DHDPS	dihydrodipicolinate synthase	[c] : aspsa + pyr --> 23dhdp + h + (2) h2o	4.2.1.52	( DapA1 (lp_2123) ) or ( DapA2 (lp_2685) )	( lp_2123 or lp_2685 )	( DapA1 ) or ( DapA2 )
DHFOR2	dihydrofolate reductase	[c] : dhf + nadp <==> fol + nadph	1.5.1.3
DHFR	dihydrofolate reductase	[c] : dhf + h + nadph <==> nadp + thf	1.5.1.3	DfrA (lp_1869)	lp_1869	DfrA
DHFS	dihydrofolate synthase	[c] : atp + dhpt + glu-L --> adp + dhf + h + pi	6.3.2.12	( FolC2 (lp_3296) ) or ( FolC1 (lp_2321) )	( lp_3296 or lp_2321 )	( FolC2 ) or ( FolC1 )
DHNPA	dihydroneopterin aldolase	[c] : dhnpt --> 2ahhmp + gcald	4.1.2.25	FolB (lp_3299)	lp_3299	FolB
DHORD6	dihydoorotic acid dehydrogenase (NAD)	[c] : dhor-S + nad <==> h + nadh + orot	1.3.1.14	PyrD (lp_2699)	lp_2699	PyrD
DHORTS	dihydroorotase	[c] : dhor-S + h2o <==> cbasp + h	3.5.2.3	PyrC (lp_2702)	lp_2702	PyrC
DHPS3	dihydropteroate synthase	[c] : 2ahhmd + 4abz --> dhpt + ppi	2.5.1.15	FolP (lp_3294)	lp_3294	FolP
DHQD	3-dehydroquinate dehydratase	[c] : 3dhq <==> 3dhsk + h2o	4.2.1.10	( AroC1 (lp_2798) ) or ( AroC2 (lp_3493) )	( lp_2798 or lp_3493 )	( AroC1 ) or ( AroC2 )
DHQS	3-dehydroquinate synthase	[c] : 2dda7p --> 3dhq + pi	4.2.3.4	AroB (lp_1086)	lp_1086	AroB
DIACTt	diacetyl diffusion	diact[c] <==> diact[e]
DINSK	deoxyinosine kinase	[c] : atp + din --> adp + dimp		( Dgk1 (lp_1011) ) or ( Dgk2 (lp_1329) )	( lp_1011 or lp_1329 )	( Dgk1 ) or ( Dgk2 )
DMATT	dimethylallyltranstransferase	[c] : dmpp + ipdp --> grdp + ppi	2.5.1.1	IspA (lp_1602)	lp_1602	IspA
DNAS_LPL	DNA synthesis, LPL specific	[c] : (1.37) atp + (0.28) datp + (0.22) dctp + (0.22) dgtp + (0.28) dttp + (1.37) h2o --> (0.01) DNA_LPL + (1.37) adp + (1.37) h + (1.37) pi + ppi
DNMPPA	Dihydroneopterin monophosphate dephosphorylase	[c] : dhpmp + h2o --> dhnpt + h + pi
DNTPPA	Dihydroneopterin triphosphate pyrophosphatase	[c] : ahdt + h2o --> dhpmp + ppi		Xtp2 (lp_3295)	lp_3295	Xtp2
DPCOAK	dephospho-CoA kinase	[c] : atp + dpcoa --> adp + coa + h	2.7.1.24	CoaE (lp_1510)	lp_1510	CoaE
DPMVD	diphosphomevalonate decarboxylase	[c] : 5dpmev + atp --> adp + co2 + ipdp + pi	4.1.1.33	MvaD (lp_1734)	lp_1734	MvaD
DPR	2-dehydropantoate 2-reductase	[c] : 2dhp + h + nadph --> nadp + pant-R	1.1.1.169	( PanE1 (lp_2532) ) or ( PanE2 (lp_2788) )	( lp_2532 or lp_2788 )	( PanE1 ) or ( PanE2 )
DRBK	Deoxyribokinase	[c] : atp + drib --> 2dr5p + adp + h	2.7.1.15	( RbsK1 (lp_0500) ) or ( RbsK2 (lp_2251) ) or ( RbsK3 (lp_3660) )	( lp_0500 or lp_2251 or lp_3660 )	( RbsK1 ) or ( RbsK2 ) or ( RbsK3 )
DRIBt2	deoxyribose transport in via proton symporter	drib[e] + h[e] --> drib[c] + h[c]		Lp_0498 (lp_0498)	lp_0498	Lp_0498
DRPA	deoxyribose-phosphate aldolase	[c] : 2dr5p --> acald + g3p	4.1.2.4	DeoC (lp_0497)	lp_0497	DeoC
DTMPK	dTMP kinase	[c] : atp + dtmp <==> adp + dtdp	2.7.4.9	Tmk (lp_0703)	lp_0703	Tmk
DURIK1	deoxyuridine kinase (ATP:Deoxyuridine)	[c] : atp + duri --> adp + dump + h		Tdk (lp_2379)	lp_2379	Tdk
DURIPP	purine-nucleoside phosphatase (deoxyuridine)	[c] : duri + pi <==> 2dr1p + ura	2.4.2.1	DeoD (lp_0125)	lp_0125	DeoD
DUTPDP	dUTP diphosphatase	[c] : dutp + h2o --> dump + h + ppi	3.6.1.23	Dut (lp_0604)	lp_0604	Dut
DXPS	1-deoxy-D-xylulose 5-phosphate synthase	[c] : g3p + h + pyr --> co2 + dxyl5p		Dxs (lp_2610)	lp_2610	Dxs
ENO	enolase	[c] : 2pg <==> h2o + pep	4.2.1.11	( EnoA1 (lp_0792) ) or ( EnoA2 (lp_1920) )	( lp_0792 or lp_1920 )	( EnoA1 ) or ( EnoA2 )
EPPP	exopolyphosphatase	[c] : h2o + polypi --> (2) h + pi	3.6.1.11	( Ppx2 (lp_0841) ) or ( Ppx1 (lp_0446) ) or ( Ppx3 (lp_0843) )	( lp_0841 or lp_0446 or lp_0843 )	( Ppx2 ) or ( Ppx1 ) or ( Ppx3 )
ETOHt1	ethanol transport in/out via diffusion	etoh[e] <==> etoh[c]
EX_2aeppn(e)	(2-Aminoethyl)phosphonate exchange	[e] : 2aeppn <==>
EX_2hxic-L(e)	L-2-hydroxyisocaproate exchange	[e] : 2hxic-L <==>
EX_2mba(e)	2-methyl butanoic acid exchange	[e] : 2mba <==>
EX_2mbal(e)	2-Methylbutanal exchange	[e] : 2mbal <==>
EX_2mbol(e)	2-methylbutanol exchange	[e] : 2mbol <==>
EX_2mpa(e)	2-methylpropanoic acid exchange	[e] : 2mpa <==>
EX_2mpal(e)	2-methylpropanal exchange	[e] : 2mpal <==>
EX_2mpol(e)	2-methylpropanol exchange	[e] : 2mpol <==>
EX_34hplac(e)	(R)-3-(4-Hydroxyphenyl)lactate exchange	[e] : 34hplac <==>
EX_3mba(e)	3-methylbutanoic acid exchange	[e] : 3mba <==>
EX_3mbal(e)	3-methylbutanal exchange	[e] : 3mbal <==>
EX_3mbol(e)	3-methylbutanol exchange	[e] : 3mbol <==>
EX_4abut(e)	4-Aminobutanoate exchange	[e] : 4abut <==>
EX_4abz(e)	4-Aminobenzoate exchange	[e] : 4abz <==>
EX_ac(e)	Acetate exchange	[e] : ac <==>
EX_acald(e)	Acetaldehyde exchange	[e] : acald <==>
EX_acgala(e)	N-Acetyl-D-galactosamine exchange	[e] : acgala <==>
EX_acgam(e)	N-Acetyl-D-glucosamine exchange	[e] : acgam <==>
EX_actn-R(e)	(R)-Acetoin exchange	[e] : actn-R <==>
EX_ade(e)	Adenine exchange	[e] : ade <==>
EX_ala-L(e)	L-Alanine exchange	[e] : ala-L <==>
EX_arab-L(e)	L-Arabinose exchange	[e] : arab-L <==>
EX_arg-L(e)	L-Arginine exchange	[e] : arg-L <==>
EX_asn-L(e)	L-Asparagine exchange	[e] : asn-L <==>
EX_asp-L(e)	L-Aspartate exchange	[e] : asp-L <==>
EX_btd-RR(e)	(R,R)-2,3-Butanediol exchange	[e] : btd-RR <==>
EX_btn(e)	Biotin exchange	[e] : btn <==>
EX_bzal(e)	Benzaldehyde exchange	[e] : bzal <==>
EX_cellb(e)	cellobiose exchange	[e] : cellb <==>
EX_chol(e)	Choline exchange	[e] : chol <==>
EX_cit(e)	Citrate exchange	[e] : cit <==>
EX_co2(e)	CO2 exchange	[e] : co2 <==>
EX_csn(e)	Cytosine exchange	[e] : csn <==>
EX_cys-L(e)	L-Cysteine exchange	[e] : cys-L <==>
EX_dcyt(e)	Deoxycytidine exchange	[e] : dcyt <==>
EX_dha(e)	Dihydroxyacetone exchange	[e] : dha <==>
EX_diact(e)	Diacetyl exchange	[e] : diact <==>
EX_drib(e)	Deoxyribose exchange	[e] : drib <==>
EX_etoh(e)	Ethanol exchange	[e] : etoh <==>
EX_fol(e)	Folate exchange	[e] : fol <==>
EX_for(e)	Formate exchange	[e] : for <==>
EX_fru(e)	D-Fructose exchange	[e] : fru <==>
EX_fuc-L(e)	L-Fucose exchange	[e] : fuc-L <==>
EX_galt(e)	Galactitol exchange	[e] : galt <==>
EX_glc(e)	D-Glucose exchange	[e] : glc-D <==>
EX_glcn-D(e)	D-Gluconate exchange	[e] : glcn-D <==>
EX_gln-L(e)	L-Glutamine exchange	[e] : gln-L <==>
EX_glu-L(e)	L-Glutamate exchange	[e] : glu-L <==>
EX_gly(e)	Glycine exchange	[e] : gly <==>
EX_glyb(e)	Glycine betaine exchange	[e] : glyb <==>
EX_glyc(e)	Glycerol exchange	[e] : glyc <==>
EX_glyclt(e)	Glycolate exchange	[e] : glyclt <==>
EX_gua(e)	Guanine exchange	[e] : gua <==>
EX_h(e)	H+ exchange	[e] : h <==>
EX_h2o(e)	H2O exchange	[e] : h2o <==>
EX_his-L(e)	L-Histidine exchange	[e] : his-L <==>
EX_hista(e)	Histamine exchange	[e] : hista <==>
EX_hxan(e)	Hypoxanthine exchange	[e] : hxan <==>
EX_ile-L(e)	L-Isoleucine exchange	[e] : ile-L <==>
EX_imlac(e)	imidazole lactate exchange	[e] : imlac <==>
EX_indlac(e)	Indolelactate exchange	[e] : indlac <==>
EX_ins(e)	Inosine exchange	[e] : ins <==>
EX_lac-D(e)	D-lactate exchange	[e] : lac-D <==>
EX_lac-L(e)	L-Lactate exchange	[e] : lac-L <==>
EX_lcts(e)	Lactose exchange	[e] : lcts <==>
EX_leu-L(e)	L-Leucine exchange	[e] : leu-L <==>
EX_lys-L(e)	L-Lysine exchange	[e] : lys-L <==>
EX_mal-L(e)	L-Malate exchange	[e] : mal-L <==>
EX_malt(e)	Maltose exchange	[e] : malt <==>
EX_man(e)	D-Mannose exchange	[e] : man <==>
EX_melib(e)	Melibiose exchange	[e] : melib <==>
EX_met-L(e)	L-Methionine exchange	[e] : met-L <==>
EX_methal(e)	Methional exchange	[e] : methal <==>
EX_mn2(e)	Mn2+ exchange	[e] : mn2 <==>
EX_mnl(e)	D-Mannitol exchange	[e] : mnl <==>
EX_na1(e)	Sodium exchange	[e] : na1 <==>
EX_nac(e)	Nicotinate exchange	[e] : nac <==>
EX_nh4(e)	Ammonium exchange	[e] : nh4 <==>
EX_no2(e)	Nitrite exchange	[e] : no2 <==>
EX_no3(e)	Nitrate exchange	[e] : no3 <==>
EX_o2(e)	O2 exchange	[e] : o2 <==>
EX_orot(e)	Orotate exchange	[e] : orot <==>
EX_pacald(e)	Phenylacetaldehyde exchange	[e] : pacald <==>
EX_pea(e)	Phenylethyl alcohol exchange	[e] : pea <==>
EX_phe-L(e)	L-Phenylalanine exchange	[e] : phe-L <==>
EX_phenol(e)	Phenol exchange	[e] : phenol <==>
EX_phlac(e)	Phenyl lactate exchange	[e] : phlac <==>
EX_pi(e)	Phosphate exchange	[e] : pi <==>
EX_pnto-R(e)	(R)-Pantothenate exchange	[e] : pnto-R <==>
EX_pro-L(e)	L-Proline exchange	[e] : pro-L <==>
EX_ptrc(e)	Putrescine exchange	[e] : ptrc <==>
EX_pydam(e)	Pyridoxamine exchange	[e] : pydam <==>
EX_pydxn(e)	Pyridoxine exchange	[e] : pydxn <==>
EX_pyr(e)	Pyruvate exchange	[e] : pyr <==>
EX_rib-D(e)	D-Ribose exchange	[e] : rib-D <==>
EX_ribflv(e)	Riboflavin exchange	[e] : ribflv <==>
EX_sbt-D(e)	D-Sorbitol exchange	[e] : sbt-D <==>
EX_ser-L(e)	Exchange for Serine	[e] : ser-L <==>
EX_so4(e)	Sulfate exchange	[e] : so4 <==>
EX_spmd(e)	Spermidine exchange	[e] : spmd <==>
EX_succ(e)	Succinate exchange	[e] : succ <==>
EX_sucr(e)	Sucrose exchange	[e] : sucr <==>
EX_thm(e)	Thiamin exchange	[e] : thm <==>
EX_thr-L(e)	L-Threonine exchange	[e] : thr-L <==>
EX_thymd(e)	Thymidine exchange	[e] : thymd <==>
EX_tre(e)	Trehalose exchange	[e] : tre <==>
EX_trp-L(e)	L-Tryptophan exchange	[e] : trp-L <==>
EX_tyr-L(e)	L-Tyrosine exchange	[e] : tyr-L <==>
EX_ura(e)	Uracil exchange	[e] : ura <==>
EX_val-L(e)	L-Valine exchange	[e] : val-L <==>
EX_xan(e)	Xanthine exchange	[e] : xan <==>
F1PK	fructose-1-phosphate kinase	[c] : atp + f1p --> adp + fdp + h	2.7.1.56	FruK (lp_2096)	lp_2096	FruK
F6PA	fructose 6-phosphate aldolase	[c] : f6p <==> dha + g3p		( Tal1 (lp_2600) ) or ( Tal3 (lp_3617) )	( lp_2600 or lp_3617 )	( Tal1 ) or ( Tal3 )
FABM1	Fatty acid enoyl isomerase (FabM reaction)	[c] : 2thdeacp <==> 2chdeacp
FABM2	Fatty acid enoyl isomerase (FabM reaction, 18:1)	[c] : 2tocdacp <==> 2cocdacp
FBA	fructose-bisphosphate aldolase	[c] : fdp <==> dhap + g3p	4.1.2.13	Fba (lp_0330)	lp_0330	Fba
FFSD	beta-fructofuranosidase	[c] : h2o + suc6p --> fru + g6p	3.2.1.26	SacA (lp_0187)	lp_0187	SacA
FLVR	flavin reductase	[c] : h + nadph + ribflv --> nadp + ribflvRD	1.5.1.30	NfrA (lp_0829)	lp_0829	NfrA
FMETDF	formylmethionine deformylase	[c] : fmet + h2o --> for + met-L	3.5.1.31	( Def2 (lp_2935) ) or ( Def1 (lp_2155) )	( lp_2935 or lp_2155 )	( Def2 ) or ( Def1 )
FMNAT	FMN adenylyltransferase	[c] : atp + fmn + h --> fad + ppi	2.7.7.2	( RibC2 (lp_2031) ) or ( RibC1 (lp_0850) )	( lp_2031 or lp_0850 )	( RibC2 ) or ( RibC1 )
FOLt	folate transport via proton simport	fol[e] + h[e] <==> fol[c] + h[c]
FORt2	formate transport in via proton symport	for[e] + h[e] <==> for[c] + h[c]
FRDx	fumarate reductase (NADH)	[c] : fum + h + nadh <==> nad + succ
FRUK	fructokinase	[c] : atp + fru --> adp + f6p + h	2.7.1.4	( SacK1 (lp_0184) ) or ( SacK2 (lp_3637) )	( lp_0184 or lp_3637 )	( SacK1 ) or ( SacK2 )
FRUpts	D-fructose transport via PEP:Pyr PTS	fru[e] + pep[c] --> f1p[c] + pyr[c]		( EII_fru (lp_2097) and Hpr (lp_1273) and PtsI (lp_1274) )	( lp_2097 and lp_1273 and lp_1274 )	( EII_fru and Hpr and PtsI )
FTHFCL	5-formyltetrahydrofolate cyclo-ligase	[c] : 5fothf + atp --> adp + methf + pi	6.3.3.2	FthC (lp_1570)	lp_1570	FthC
FTHFL	formate-tetrahydrofolate ligase	[c] : atp + for + thf --> 10fthf + adp + pi	6.3.4.3	Fhs (lp_1779)	lp_1779	Fhs
FUCt	L-fucose transport via proton symport	fuc-L[e] + h[e] <==> fuc-L[c] + h[c]		Lp_0498 (lp_0498)	lp_0498	Lp_0498
FUM	fumarase	[c] : fum + h2o <==> mal-L	4.2.1.2	Fum (lp_1112)	lp_1112	Fum
G1PACT	glucosamine-1-phosphate N-acetyltransferase	[c] : accoa + gam1p --> acgam1p + coa + h	2.3.1.157	GlmU (lp_0467)	lp_0467	GlmU
G1PTMT	glucose-1-phosphate thymidylyltransferase	[c] : dttp + g1p + h --> dtdpglc + ppi	2.7.7.24	RfbA (lp_1186)	lp_1186	RfbA
G3PCT	glycerol-3-phosphate cytidylyltransferase	[c] : ctp + glyc3p + h --> cdpglyc + ppi	2.7.7.39	( TagD1 (lp_0267) ) or ( TagD2 (lp_1248) )	( lp_0267 or lp_1248 )	( TagD1 ) or ( TagD2 )
G3PD1	glycerol-3-phosphate dehydrogenase (NAD)	[c] : glyc3p + nad <==> dhap + h + nadh	1.1.1.94	GpsA (lp_0756)	lp_0756	GpsA
G3PO	glycerol 3-phosphate oxidase	[c] : glyc3p + o2 --> dhap + h2o2	1.1.3.21	GlpD (lp_0371)	lp_0371	GlpD
G5SADs	L-glutamate 5-semialdehyde dehydratase (spontaneous)	[c] : glu5sa <==> 1pyr5c + h + h2o
G5SD	glutamate-5-semialdehyde dehydrogenase	[c] : glu5p + h + nadph --> glu5sa + nadp + pi	1.2.1.41	ProA (lp_0017)	lp_0017	ProA
G6PDA	glucosamine-6-phosphate deaminase	[c] : gam6p + h2o --> f6p + nh4	3.5.99.6	Gnp (lp_0226)	lp_0226	Gnp
G6PDHy	glucose 6-phosphate dehydrogenase	[c] : g6p + nadp <==> 6pgl + h + nadph	1.1.1.49	Gpd (lp_2681)	lp_2681	Gpd
G6PI	Glucose-6-phosphate isomerase	[c] : g6p <==> g6p-B	5.3.1.9	Pgi (lp_2502)	lp_2502	Pgi
GABAt6	4-aminobutyrate transport in/out via proton symport	4abut[e] + h[e] <==> 4abut[c] + h[c]
GALK2	galactokinase	[c] : a-gal-D + atp --> adp + gal1p + h	2.7.1.6	GalK (lp_3482)	lp_3482	GalK
GALM	aldose 1-epimerase	[c] : gal <==> a-gal-D	5.1.3.3	( GalM2 (lp_1731) ) or ( GalM3 (lp_3487) ) or ( GalM1 (lp_0826) )	( lp_1731 or lp_3487 or lp_0826 )	( GalM2 ) or ( GalM3 ) or ( GalM1 )
GALS3	a-galactosidase (melibiose)	[c] : h2o + melib --> gal + glc-D	3.2.1.22	MelA (lp_3485)	lp_3485	MelA
GALSZ	beta-galactosidase	[c] : h2o + lcts --> gal + glc-D	3.2.1.23	LacA (lp_3469)	lp_3469	LacA
GALT	galactose-1-phosphate uridylyltransferase	[c] : gal1p + h + utp <==> ppi + udpgal	2.7.7.10	GalT (lp_3480)	lp_3480	GalT
GALTpts	Galactitol transport via PEP:Pyr PTS	galt[e] + pep[c] --> galt1p[c] + pyr[c]		( EII_galt ( lp_3599 and lp_3600 and lp_3601 ) or ( lp_3546 and lp_3547 and lp_3548 ) and Hpr (lp_1273) and PtsI (lp_1274) )	( ( ( lp_3599 and lp_3600 and lp_3601 ) or ( lp_3546 and lp_3547 and lp_3548 ) ) and lp_1273 and lp_1274 )	( EII_galt and Hpr and PtsI )
GALU	UTP-glucose-1-phosphate uridylyltransferase	[c] : g1p + h + utp <==> ppi + udpg	2.7.7.9	GalU (lp_0757)	lp_0757	GalU
GAPD	glyceraldehyde-3-phosphate dehydrogenase (NAD)	[c] : g3p + nad + pi <==> 13dpg + h + nadh	1.2.1.12	GapB (lp_0789)	lp_0789	GapB
GARFT	phosphoribosylglycinamide formyltransferase	[c] : 10fthf + gar <==> fgam + h + thf	2.1.2.2	PurN (lp_2721)	lp_2721	PurN
GAT1_LPL	glycerol 3-phosphate acyltransferase (Lb plantarum specific)	[c] : (0.12) 2chdeacp + (0.32) 2cocdacp + (0.25) cpocdacp + glyc3p + (0.26) hdeacp + (0.02) ocdacp + (0.03) tdeacp --> acp + (0.01) agly3p_LPL	2.3.1.15
GCALDD	Glycolaldehyde dehydrogenase	[c] : gcald + h2o + nad --> glyclt + (2) h + nadh	1.2.1.21
GF6PTA	glutamine-fructose-6-phosphate transaminase	[c] : f6p + gln-L --> gam6p + glu-L	2.6.1.16	GlmS (lp_0822)	lp_0822	GlmS
GHMT	glycine hydroxymethyltransferase	[c] : ser-L + thf <==> gly + h2o + mlthf	2.1.2.1	GlyA (lp_2375)	lp_2375	GlyA
GK1	guanylate kinase (GMP:ATP)	[c] : atp + gmp <==> adp + gdp	2.7.4.8	( Gmk1 (lp_1612) ) or ( Gmk2 (lp_0866) )	( lp_1612 or lp_0866 )	( Gmk1 ) or ( Gmk2 )
GK2	guanylate kinase (GMP:dATP)	[c] : datp + gmp <==> dadp + gdp	2.7.4.8	( Gmk1 (lp_1612) ) or ( Gmk2 (lp_0866) )	( lp_1612 or lp_0866 )	( Gmk1 ) or ( Gmk2 )
GLCNt2	D-gluconate transport via proton symport, reversible	glcn-D[e] + h[e] <==> glcn-D[c] + h[c]		GntP (lp_1249)	lp_1249	GntP
GLCP	glycogen phosphorylase	[c] : glycogen + pi --> g1p	2.4.1.1	( Amy1 (lp_0025) and GlgP (lp_0024) )	( lp_0025 and lp_0024 )	( Amy1 and GlgP )
GLCS1	glycogen synthase (ADPGlc)	[c] : adpglc --> adp + glycogen + h	2.4.1.21	( GlgA (lp_0023) and GlgB (lp_0020) )	( lp_0023 and lp_0020 )	( GlgA and GlgB )
GLCpts	D-glucose transport via PEP:Pyr PTS	glc-D[e] + pep[c] --> g6p[c] + pyr[c]		( EII_acga_glc (lp_2531) and Hpr (lp_1273) and PtsI (lp_1274) ) or ( EII_glc ( lp_3520 and lp_3522 ) and Hpr (lp_1273) and PtsI (lp_1274) )	( ( lp_2531 and lp_1273 and lp_1274 ) or ( ( lp_3520 and lp_3522 ) and lp_1273 and lp_1274 ) )	( EII_acga_glc and Hpr and PtsI ) or ( EII_glc and Hpr and PtsI )
GLGC	glucose-1-phosphate adenylyltransferase	[c] : atp + g1p + h --> adpglc + ppi	2.7.7.27	( GlgC (lp_0021) and GlgD (lp_0022) )	( lp_0021 and lp_0022 )	( GlgC and GlgD )
GLNS	glutamine synthetase	[c] : atp + glu-L + nh4 --> adp + gln-L + h + pi	6.3.1.2	GlnA (lp_1581)	lp_1581	GlnA
GLNTAL	glutamyl-tRNA(Gln):L-glutamine amido-ligase (ADP-forming)	[c] : atp + gln-L + glutrna + h2o <==> adp + glntrna + glu-L + h + pi		( GatA2 (lp_1148) and GatB2 (lp_1149) and GatC2 (lp_1147) )	( lp_1148 and lp_1149 and lp_1147 )	( GatA2 and GatB2 and GatC2 )
GLNabc	L-glutamine transport via ABC system	atp[c] + gln-L[e] + h2o[c] --> adp[c] + gln-L[c] + h[c] + pi[c]		( GlnHPQ1 ( lp_0802 and lp_0803 ) ) or ( GlnHPQ3 ( lp_2312 and lp_2313 and lp_2314 ) ) or ( GlnHPQ2 ( lp_2110 and lp_2111 ) ) or ( GlnHMPQ ( lp_0878 and lp_0881 and lp_0882 and lp_0883 ) )	( ( lp_0802 and lp_0803 ) or ( lp_2312 and lp_2313 and lp_2314 ) or ( lp_2110 and lp_2111 ) or ( lp_0878 and lp_0881 and lp_0882 and lp_0883 ) )	( GlnHPQ1 ) or ( GlnHPQ3 ) or ( GlnHPQ2 ) or ( GlnHMPQ )
GLTAL	Glucose lipoteichoic acid ligase	[c] : (0.01) LTA_LPL + (25) udpg --> (0.01) LTAglc_LPL + (25) h + (25) udp		TagE ( lp_2498 ) or ( lp_2843 ) or ( lp_2844 ) or ( lp_1312 ) or ( lp_1311 ) or ( lp_1299 )	( lp_2498 or lp_2843 or lp_2844 or lp_1312 or lp_1311 or lp_1299 )	TagE
GLU5K	glutamate 5-kinase	[c] : atp + glu-L --> adp + glu5p	2.7.2.11	ProB (lp_0016)	lp_0016	ProB
GLUCYSL	glutamate-cysteine ligase	[c] : atp + cys-L + glu-L --> adp + glucys + h + pi	6.3.2.2	( GshA (lp_2324) ) or ( GshF (lp_2336) )	( lp_2324 or lp_2336 )	( GshA ) or ( GshF )
GLUDC	glutamate decarboxylase	[c] : glu-L + h --> 4abut + co2	4.1.1.15	GadB (lp_3420)	lp_3420	GadB
GLUDy	glutamate dehydrogenase (NADP)	[c] : glu-L + h2o + nadp <==> akg + h + nadph + nh4	1.4.1.4	Gdh (lp_1169)	lp_1169	Gdh
GLUPRT	glutamine phosphoribosyldiphosphate amidotransferase	[c] : gln-L + h2o + prpp --> glu-L + ppi + pram	2.4.2.14	PurF (lp_2723)	lp_2723	PurF
GLUR	glutamate racemase	[c] : glu-D <==> glu-L	5.1.1.3	MurI (lp_2268)	lp_2268	MurI
GLUTRS	Glutamyl-tRNA synthetase	[c] : atp + glu-L + trnaglu --> amp + glutrna + h + ppi	6.1.1.17	GltX (lp_0609)	lp_0609	GltX
GLUt6	L-glutamate transport in/out via proton symporter	glu-L[e] + h[e] <==> glu-L[c] + h[c]		Lp_2818 (lp_2818)	lp_2818	Lp_2818
GLYBabc	glycine betaine transport via ABC system	atp[c] + glyb[e] + h2o[c] --> adp[c] + glyb[c] + h[c] + pi[c]		( ChoQS ( lp_0367 and lp_0368 ) ) or ( OpuABCD ( lp_1607 and lp_1608 and lp_1609 and lp_1610 ) )	( ( lp_0367 and lp_0368 ) or ( lp_1607 and lp_1608 and lp_1609 and lp_1610 ) )	( ChoQS ) or ( OpuABCD )
GLYBt6	betaine (glycine betaine) transport in/out via proton symport	glyb[e] + h[e] <==> glyb[c] + h[c]		Lp_3324 (lp_3324)	lp_3324	Lp_3324
GLYCK	glycerate kinase	[c] : atp + glyc-R --> 3pg + adp + h	2.7.1.31	GlyK (lp_3266)	lp_3266	GlyK
GLYCLTt2r	glycolate transport via proton symport, reversible	glyclt[e] + h[e] <==> glyclt[c] + h[c]
GLYCOGEN_STORE	storage/mobilisation of glycogen	glycogen[c] <==> glycogen[e]
GLYCt1	glycerol transport via uniport (facilitated diffusion)	glyc[e] --> glyc[c]		( GlpF4 (lp_1175) ) or ( GlpF1 (lp_0108) ) or ( GlpF5 (lp_3436) ) or ( GlpF6 (lp_3463) ) or ( GlpF3 (lp_0372) )	( lp_1175 or lp_0108 or lp_3436 or lp_3463 or lp_0372 )	( GlpF4 ) or ( GlpF1 ) or ( GlpF5 ) or ( GlpF6 ) or ( GlpF3 )
GLYK	glycerol kinase	[c] : atp + glyc --> adp + glyc3p + h	2.7.1.30	( GlpK2 (lp_0834) ) or ( GlpK1 (lp_0370) )	( lp_0834 or lp_0370 )	( GlpK2 ) or ( GlpK1 )
GLYTRS	Glycyl-tRNA synthetase	[c] : atp + gly + trnagly --> amp + glytrna + h + ppi	6.1.1.14	GlyQS ( lp_1964 and lp_1965 )	( lp_1964 and lp_1965 )	GlyQS
GLYt6	glycine transport in/out via proton symport	gly[e] + h[e] <==> gly[c] + h[c]
GMPR	GMP reductase	[c] : gmp + (2) h + nadph --> imp + nadp + nh4	1.7.1.7	GuaC (lp_3271)	lp_3271	GuaC
GMPS2	GMP synthase (glutamine-hydrolysing)	[c] : atp + gln-L + h2o + xmp --> amp + glu-L + gmp + (2) h + ppi	6.3.5.2	GuaA (lp_0914)	lp_0914	GuaA
GNK	gluconokinase	[c] : atp + glcn-D --> 6pgc + adp + h	2.7.1.12	GntK (lp_1250)	lp_1250	GntK
GPDDA1	Glycerophosphodiester phosphodiesterase (sn-Glycero-3-phosphocholine)	[c] : g3pc + h2o --> chol + glyc3p + h	3.1.4.46	P_3.1.4.46 ( lp_2344 ) or ( lp_1328 ) or ( lp_2582 ) or ( lp_1578 )	( lp_2344 or lp_1328 or lp_2582 or lp_1578 )	P_3.1.4.46
GPDDA2	Glycerophosphodiester phosphodiesterase (Glycerophosphoethanolamine)	[c] : g3pe + h2o --> etha + glyc3p + h	3.1.4.46	P_3.1.4.46 ( lp_2344 ) or ( lp_1328 ) or ( lp_2582 ) or ( lp_1578 )	( lp_2344 or lp_1328 or lp_2582 or lp_1578 )	P_3.1.4.46
GPDDA3	Glycerophosphodiester phosphodiesterase (Glycerophosphoserine)	[c] : g3ps + h2o --> glyc3p + h + ser-L	3.1.4.46	P_3.1.4.46 ( lp_2344 ) or ( lp_1328 ) or ( lp_2582 ) or ( lp_1578 )	( lp_2344 or lp_1328 or lp_2582 or lp_1578 )	P_3.1.4.46
GPDDA4	Glycerophosphodiester phosphodiesterase (Glycerophosphoglycerol)	[c] : g3pg + h2o --> glyc + glyc3p + h	3.1.4.46	P_3.1.4.46 ( lp_2344 ) or ( lp_1328 ) or ( lp_2582 ) or ( lp_1578 )	( lp_2344 or lp_1328 or lp_2582 or lp_1578 )	P_3.1.4.46
GPDDA5	Glycerophosphodiester phosphodiesterase (Glycerophosphoinositol)	[c] : g3pi + h2o --> glyc3p + h + inost	3.1.4.46	P_3.1.4.46 ( lp_2344 ) or ( lp_1328 ) or ( lp_2582 ) or ( lp_1578 )	( lp_2344 or lp_1328 or lp_2582 or lp_1578 )	P_3.1.4.46
GRTAL	Glucose ribitol teichoic acid ligase	[c] : RTA + (25) udpg --> RTAglc + (25) h + (25) udp		( GtcA1 (lp_1372) ) or ( GtcA2 (lp_2747) ) or ( GtcA3 (lp_2989) )	( lp_1372 or lp_2747 or lp_2989 )	( GtcA1 ) or ( GtcA2 ) or ( GtcA3 )
GRTT	geranyltranstransferase	[c] : grdp + ipdp --> frdp + ppi	2.5.1.10	IspA (lp_1602)	lp_1602	IspA
GSHPO	glutathione peroxidase	[c] : (2) gthrd + h2o2 --> gthox + (2) h2o	1.11.1.9	Gpo (lp_0220)	lp_0220	Gpo
GTHRD	glutathione-disulfide reductase	[c] : (2) gthrd + nadp <==> gthox + h + nadph	1.8.1.7	( GshR1 (lp_0369) ) or ( GshR4 (lp_3267) ) or ( GshR2 (lp_1253) ) or ( GshR3 (lp_1822) )	( lp_0369 or lp_3267 or lp_1253 or lp_1822 )	( GshR1 ) or ( GshR4 ) or ( GshR2 ) or ( GshR3 )
GTHS	glutathione synthase	[c] : atp + glucys + gly --> adp + gthrd + h + pi	6.3.2.3	GshF (lp_2336)	lp_2336	GshF
GTPCI	GTP cyclohydrolase I	[c] : gtp + h2o --> ahdt + for + h	3.5.4.16	FolE (lp_3297)	lp_3297	FolE
GTPDPK	GTP diphosphokinase	[c] : atp + gtp --> amp + gdptp + h	2.7.6.5	( Lp_0293 (lp_0293) ) or ( Lp_2223 (lp_2223) ) or ( RelA (lp_1987) )	( lp_0293 or lp_2223 or lp_1987 )	( Lp_0293 ) or ( Lp_2223 ) or ( RelA )
GUAPRT	guanine phosphoribosyltransferase	[c] : gua + prpp --> gmp + ppi		HprT (lp_0546)	lp_0546	HprT
GUAt2	guanine transport in via proton symport	gua[e] + h[e] --> gua[c] + h[c]		( Lp_3374 (lp_3374) ) or ( PbuG (lp_0848) )	( lp_3374 or lp_0848 )	( Lp_3374 ) or ( PbuG )
H2Ot5	H2O transport via diffusion	h2o[e] <==> h2o[c]
HBUHL1	(3R)-3-Hydroxybutanoyl-[acyl-carrier-protein] hydro-lyase	[c] : 3hbacp --> 2beacp + h2o	4.2.1.58	( FabZ2 (lp_1677) ) or ( FabZ1 (lp_1670) )	( lp_1677 or lp_1670 )	( FabZ2 ) or ( FabZ1 )
HBUR1	(3R)-3-Hydroxybutanoyl-[acyl-carrier protein]:NADP+ oxidoreductase	[c] : aaacp + h + nadph --> 3hbacp + nadp	1.1.1.100	FabG1 (lp_1674)	lp_1674	FabG1
HCO3E	carbonate dehydratase (HCO3 equilibration reaction)	[c] : co2 + h2o <==> h + hco3	4.2.1.1	Cah (lp_2736)	lp_2736	Cah
HCYSMT	homocysteine S-methyltransferase	[c] : amet + hcys-L --> ahcys + h + met-L	2.1.1.10	P_2.1.1.10 (lp_1298)	lp_1298	P_2.1.1.10
HDDHL5	(3R)-3-Hydroxybutanoyl-[acyl-carrier-protein] hydro-lyase	[c] : 3hddacp --> 2tddacp + h2o	4.2.1.58	( FabZ2 (lp_1677) ) or ( FabZ1 (lp_1670) )	( lp_1677 or lp_1670 )	( FabZ2 ) or ( FabZ1 )
HDDR5	3R)-3-Hydroxydodecanoyl-[acyl-carrier-protein]:NADP+ oxidoreductase	[c] : 3oxddacp + h + nadph --> 3hddacp + nadp	1.1.1.100	FabG1 (lp_1674)	lp_1674	FabG1
HDEHL4	(3R)-3-Hydroxybutanoyl-[acyl-carrier-protein] hydro-lyase	[c] : 3hdeacp --> 2tdeacp + h2o	4.2.1.58	( FabZ2 (lp_1677) ) or ( FabZ1 (lp_1670) )	( lp_1677 or lp_1670 )	( FabZ2 ) or ( FabZ1 )
HDER4	(3R)-3-Hydroxydecanoyl-[acyl-carrier-protein]:NADP+ oxidoreductase	[c] : 3oxdeacp + h + nadph --> 3hdeacp + nadp	1.1.1.100	FabG1 (lp_1674)	lp_1674	FabG1
HDMAT7	Hexadecanoyl-[acyl-carrier protein]:malonyl-CoA C-acyltransferase	[c] : 2thdeacp + h + nadh --> hdeacp + nad	1.3.1.10	FabI (lp_1681)	lp_1681	FabI
HEMAT2	Hexanoyl-[acyl-carrier protein]:malonyl-CoA C-acyltransferase	[c] : 2theacp + h + nadh --> hexacp + nad	1.3.1.10	FabI (lp_1681)	lp_1681	FabI
HETZK	hydroxyethylthiazole kinase	[c] : 4mhetz + atp --> 4mpetz + adp + h	2.7.1.50	ThiM (lp_0113)	lp_0113	ThiM
HEX1	hexokinase (D-glucose:ATP)	[c] : atp + glc-D --> adp + g6p + h	2.7.1.2	Glk (lp_1573)	lp_1573	Glk
HHDHL7	(3R)-3-Hydroxypalmitoyl-[acyl-carrier-protein] hydro-lyase	[c] : 3hpaacp --> 2thdeacp + h2o	4.2.1.58	( FabZ2 (lp_1677) ) or ( FabZ1 (lp_1670) )	( lp_1677 or lp_1670 )	( FabZ2 ) or ( FabZ1 )
HHDR7	(3R)-3-Hydroxypalmitoyl-[acyl-carrier-protein]:NADP+ oxidoreductase	[c] : 3oxhdacp + h + nadph --> 3hpaacp + nadp	1.1.1.100	FabG1 (lp_1674)	lp_1674	FabG1
HHYHL2	(3R)-3-Hydroxybutanoyl-[acyl-carrier-protein] hydro-lyase	[c] : 3hhacp --> 2theacp + h2o	4.2.1.58	( FabZ2 (lp_1677) ) or ( FabZ1 (lp_1670) )	( lp_1677 or lp_1670 )	( FabZ2 ) or ( FabZ1 )
HHYR2	(3R)-3-Hydroxyhexanoyl-[acyl-carrier-protein]:NADP+ oxidoreductase	[c] : 3oxhacp + h + nadph --> 3hhacp + nadp	1.1.1.100	FabG1 (lp_1674)	lp_1674	FabG1
HIBD	3-hydroxyisobutyrate dehydrogenase	[c] : 3hmp + nad --> 2mop + h + nadh	1.1.1.31	HibD (lp_2548)	lp_2548	HibD
HISDC	histidine decarboxylase	[c] : h + his-L --> co2 + hista	4.1.1.22
HISTA	histidine transaminase	[c] : akg + his-L <==> glu-L + impyr	2.6.1.38
HISTAap	histide/histamine antiporter	his-L[c] + hista[e] <==> his-L[e] + hista[c]
HISTD	histidinol dehydrogenase	[c] : h2o + histd + (2) nad --> (3) h + his-L + (2) nadh	1.1.1.23	HisD (lp_2559)	lp_2559	HisD
HISTP	histidinol-phosphatase	[c] : h2o + hisp --> histd + pi	3.1.3.15	( HisK (lp_2563) ) or ( HisB (lp_2558) )	( lp_2563 or lp_2558 )	( HisK ) or ( HisB )
HISTRS	Histidyl-tRNA synthetase	[c] : atp + his-L + trnahis --> amp + h + histrna + ppi	6.1.1.21	( HisX (lp_2561) ) or ( HisS (lp_1981) )	( lp_2561 or lp_1981 )	( HisX ) or ( HisS )
HISt6	L-histidine transport in via proton symport	h[e] + his-L[e] <==> h[c] + his-L[c]
HMGCOAR	Hydroxymethylglutaryl CoA reductase	[c] : coa + mev-R + (2) nadp <==> (2) h + hmgcoa + (2) nadph	1.1.1.34	MvaA (lp_0447)	lp_0447	MvaA
HMGCOAS	Hydroxymethylglutaryl CoA synthase	[c] : coa + h + hmgcoa <==> aacoa + accoa + h2o	4.1.3.5	MvaS (lp_2067)	lp_2067	MvaS
HMPK1	hydroxymethylpyrimidine kinase (ATP)	[c] : 4ahmmp + atp --> 4ampm + adp + h	2.7.1.49	ThiD (lp_0114)	lp_0114	ThiD
HOCHL3	((3R)-3-Hydroxybutanoyl-[acyl-carrier-protein] hydro-lyase	[c] : 3hocacp --> 2toceacp + h2o	4.2.1.58	( FabZ2 (lp_1677) ) or ( FabZ1 (lp_1670) )	( lp_1677 or lp_1670 )	( FabZ2 ) or ( FabZ1 )
HOCR3	(3R)-3-Hydroxyoctanoyl-[acyl-carrier-protein]:NADP+ oxidoreductase	[c] : 3oxocacp + h + nadph --> 3hocacp + nadp	1.1.1.100	FabG1 (lp_1674)	lp_1674	FabG1
HODHL8	(3R)-3-Hydroxyoctadecanoyl-[acyl-carrier-protein] hydro-lyase	[c] : 3hocdacp --> 2tocdacp + h2o	4.2.1.58	( FabZ2 (lp_1677) ) or ( FabZ1 (lp_1670) )	( lp_1677 or lp_1670 )	( FabZ2 ) or ( FabZ1 )
HODR8	(3R)-3-Hydroxyoctadecanoyl-[acyl-carrier-protein]:NADP+ oxidoreductase	[c] : 3oxocdacp + h + nadph --> 3hocdacp + nadp	1.1.1.100	FabG1 (lp_1674)	lp_1674	FabG1
HP3MO	4-hydroxyphenylacetate 3-monooxygenase	[c] : 4hphac + h + nadh + o2 --> 34dhpha + h2o + nad	1.14.13.3	Lp_0070 (lp_0070)	lp_0070	Lp_0070
HPHLDH	hydroxyphenylpyruvate reductase	[c] : 34hpp + h + nadh <==> 34hplac + nad	1.1.1.237
HPLACt6	hydroxyphenyl lactate transport (H symport)	34hplac[c] + h[c] <==> 34hplac[e] + h[e]
HPPK	2-amino-4-hydroxy-6-hydroxymethyldihydropteridine diphosphokinase	[c] : 2ahhmp + atp --> 2ahhmd + amp + h	2.7.6.3	FolK (lp_3298)	lp_3298	FolK
HSAT	Acetyl-CoA:L-homoserine O-acetyltransferase	[c] : accoa + hom-L <==> achms + coa	2.3.1.31	MetA (lp_2537)	lp_2537	MetA
HSDy	homoserine dehydrogenase (NADPH)	[c] : hom-L + nadp <==> aspsa + h + nadph	1.1.1.3	( Hom2 (lp_0571) ) or ( Hom1 (lp_2535) )	( lp_0571 or lp_2535 )	( Hom2 ) or ( Hom1 )
HSK	homoserine kinase	[c] : atp + hom-L --> adp + h + phom	2.7.1.39	ThrB (lp_0572)	lp_0572	ThrB
HSTPT	histidinol-phosphate transaminase	[c] : glu-L + imacp --> akg + h + hisp	2.6.1.9	HisC (lp_2551)	lp_2551	HisC
HTDHL6	(3R)-3-Hydroxypalmitoyl-[acyl-carrier-protein] hydro-lyase	[c] : 3htdacp --> 2ttdeacp + h2o	4.2.1.58	( FabZ2 (lp_1677) ) or ( FabZ1 (lp_1670) )	( lp_1677 or lp_1670 )	( FabZ2 ) or ( FabZ1 )
HTDR6	3R)-3-Hydroxytetradecanoyl-[acyl-carrier-protein]:NADP+ oxidoreductase	[c] : 3oxtdacp + h + nadph --> 3htdacp + nadp	1.1.1.100	FabG1 (lp_1674)	lp_1674	FabG1
HXANt2	hypoxanthine transport in via proton symport	h[e] + hxan[e] --> h[c] + hxan[c]		PbuG (lp_0848)	lp_0848	PbuG
HXPRT	hypoxanthine phosphoribosyltransferase (Hypoxanthine)	[c] : hxan + prpp --> imp + ppi	2.4.2.8	HprT (lp_0546)	lp_0546	HprT
HYPOE	hypothetical enzyme	[c] : h2o + pyam5p --> pi + pydam
IG3PS	Imidazole-glycerol-3-phosphate synthase	[c] : gln-L + prlp --> aicar + eig3p + glu-L + (2) h		HisHF ( lp_2554 and lp_2557 )	( lp_2554 and lp_2557 )	HisHF
IGPDH	imidazoleglycerol-phosphate dehydratase	[c] : eig3p + h --> h2o + imacp	4.2.1.19	HisB (lp_2558)	lp_2558	HisB
IGPS	indole-3-glycerol-phosphate synthase	[c] : 2cpr5p + h --> 3ig3p + co2 + h2o	4.1.1.48	TrpC (lp_1655)	lp_1655	TrpC
ILDH	indolelactate dehydrogenase	[c] : (2) h + indpyr + nadh <==> indlac + nad	1.1.1.110
ILETA	isoleucine transaminase	[c] : akg + ile-L <==> 3mop + glu-L	2.6.1.42	IlvE (lp_2390)	lp_2390	IlvE
ILETRS	Isoleucyl-tRNA synthetase	[c] : atp + ile-L + trnaile --> amp + h + iletrna + ppi	6.1.1.5	IleS (lp_2187)	lp_2187	IleS
ILEabc	L-isoleucine transport via ABC system	atp[c] + h2o[c] + ile-L[e] --> adp[c] + h[c] + ile-L[c] + pi[c]		LivABCDE ( lp_2981 and lp_2982 and lp_2983 and lp_2984 and lp_2985 )	( lp_2981 and lp_2982 and lp_2983 and lp_2984 and lp_2985 )	LivABCDE
ILEt6	L-isoeucine transport in/out via proton symport	h[e] + ile-L[e] <==> h[c] + ile-L[c]		( Lp_3185 (lp_3185) ) or ( BrnQ1 (lp_0399) ) or ( BrnQ2 (lp_2213) ) or ( BrnQ3 (lp_3466) )	( lp_3185 or lp_0399 or lp_2213 or lp_3466 )	( Lp_3185 ) or ( BrnQ1 ) or ( BrnQ2 ) or ( BrnQ3 )
IMLACt6	imidazole lactate transport (H+ symport)	h[c] + imlac[c] <==> h[e] + imlac[e]
IMLDH	imidazole dehydrogenase	[c] : h + impyr + nadh <==> imlac + nad
IMPC	IMP cyclohydrolase	[c] : h2o + imp <==> fprica	3.5.4.10	PurH (lp_2720)	lp_2720	PurH
IMPD	IMP dehydrogenase	[c] : h2o + imp + nad --> h + nadh + xmp	1.1.1.205	GuaB (lp_3194)	lp_3194	GuaB
INDLACt	indolelactate diffusion	indlac[c] --> indlac[e]
INS2D	inositol 2-dehydrogenase	[c] : inost + nad --> 2ins + h + nadh	1.1.1.18	( IolG1 (lp_3605) ) or ( IolG3 (lp_3608) ) or ( IolG4 (lp_3612) ) or ( IolG2 (lp_3606) )	( lp_3605 or lp_3608 or lp_3612 or lp_3606 )	( IolG1 ) or ( IolG3 ) or ( IolG4 ) or ( IolG2 )
INSt2r	inosine transport in via proton symport, reversible	h[e] + ins[e] <==> h[c] + ins[c]
IPDDI	isopentenyl-diphosphate D-isomerase	[c] : ipdp <==> dmpp	5.3.3.2	Idi1 (lp_1732)	lp_1732	Idi1
L-LACt2	L-lactate reversible transport via proton symport	h[e] + lac-L[e] <==> h[c] + lac-L[c]		GlcA (lp_1814)	lp_1814	GlcA
LACZ	lactase	[c] : h2o + lcts --> gal + glc-D	3.2.1.108	LacLM ( lp_3483 and lp_3484 )	( lp_3483 and lp_3484 )	LacLM
LAR	lactate racemase	[c] : lac-L <==> lac-D	5.1.2.1
LCAD	lactaldehyde dehydrogenase	[c] : h2o + lald-L + nad <==> (2) h + lac-L + nadh	1.2.1.22
LCTSt6	lactose transport in/out via proton symport	h[e] + lcts[e] <==> h[c] + lcts[c]		( LacS1 (lp_3468) ) or ( LacS2 (lp_3486) )	( lp_3468 or lp_3486 )	( LacS1 ) or ( LacS2 )
LDH_D	D-lactate dehydrogenase	[c] : lac-D + nad <==> h + nadh + pyr	1.1.1.28	LdhD (lp_2057)	lp_2057	LdhD
LDH_L	L-lactate dehydrogenase	[c] : lac-L + nad <==> h + nadh + pyr	1.1.1.27	( LdhL2 (lp_1101) ) or ( LdhL1 (lp_0537) )	( lp_1101 or lp_0537 )	( LdhL2 ) or ( LdhL1 )
LEUTA	leucine transaminase	[c] : akg + leu-L <==> 4mop + glu-L	2.6.1.42	IlvE (lp_2390)	lp_2390	IlvE
LEUTRS	Leucyl-tRNA synthetase	[c] : atp + leu-L + trnaleu --> amp + h + leutrna + ppi	6.1.1.4	LeuS (lp_1316)	lp_1316	LeuS
LEUabc	L-leucine transport via ABC system	atp[c] + h2o[c] + leu-L[e] --> adp[c] + h[c] + leu-L[c] + pi[c]		LivABCDE ( lp_2981 and lp_2982 and lp_2983 and lp_2984 and lp_2985 )	( lp_2981 and lp_2982 and lp_2983 and lp_2984 and lp_2985 )	LivABCDE
LEUt6	L-leucine transport in/out via proton symport	h[e] + leu-L[e] <==> h[c] + leu-L[c]		( Lp_3185 (lp_3185) ) or ( BrnQ1 (lp_0399) ) or ( BrnQ2 (lp_2213) ) or ( BrnQ3 (lp_3466) )	( lp_3185 or lp_0399 or lp_2213 or lp_3466 )	( Lp_3185 ) or ( BrnQ1 ) or ( BrnQ2 ) or ( BrnQ3 )
LOXD	D-lactate oxidase	[c] : lac-D + o2 --> h2o2 + pyr	1.13.12.4	LoxD (lp_0291)	lp_0291	LoxD
LOXL	L-lactate oxidase	[c] : lac-L + o2 --> h2o2 + pyr	1.13.12.4	Lox (lp_3586)	lp_3586	Lox
LPGS_LPL	lysylphosphatidyl-glycerol synthetase	[c] : lystrna + (0.01) pg_LPL --> (0.01) lyspg_LPL + trnalys		MprF (lp_0690)	lp_0690	MprF
LTAS_LPL	Lipoteichoic acid synthase (LPL specific)	[c] : (0.01) dgdag_LPL + (0.25) pg_LPL --> (0.01) LTA_LPL + (0.25) dag_LPL	2.7.8.20
LYSTRS	Lysyl-tRNA synthetase	[c] : atp + lys-L + trnalys --> amp + h + lystrna + ppi	6.1.1.6	LysS (lp_0550)	lp_0550	LysS
LYSt6	L-lysine transport in/out via proton symport	h[e] + lys-L[e] <==> h[c] + lys-L[c]		LysP (lp_1008)	lp_1008	LysP
M1PD	mannitol-1-phosphate 5-dehydrogenase	[c] : mnl1p + nad <==> f6p + h + nadh	1.1.1.17	MtlD (lp_0233)	lp_0233	MtlD
MACPMT	Malonyl-CoA:[acyl-carrier-protein] S-malonyltransferase	[c] : acp + malcoa --> coa + malacp	2.3.1.39	FabD (lp_1673)	lp_1673	FabD
MALLAC	malolactic enzyme	[c] : h + mal-L --> co2 + lac-L		MleS (lp_1118)	lp_1118	MleS
MALP	maltose phosphorylase	[c] : malt + pi <==> g1p-B + glc-D	2.4.1.8	( Map2 (lp_0181) ) or ( Map1 (lp_0028) ) or ( Map3 (lp_1730) ) or ( Map4 (lp_3530) )	( lp_0181 or lp_0028 or lp_1730 or lp_3530 )	( Map2 ) or ( Map1 ) or ( Map3 ) or ( Map4 )
MALT	alpha-glucosidase	[c] : h2o + malt --> (2) glc-D	3.2.1.20	Agl1 (lp_0174)	lp_0174	Agl1
MALTAT	maltose O-acetyltransferase	[c] : accoa + malt --> acmalt + coa	2.3.1.79	( Maa1 (lp_2550) ) or ( Maa2 (lp_2878) ) or ( Maa3 (lp_3553) )	( lp_2550 or lp_2878 or lp_3553 )	( Maa1 ) or ( Maa2 ) or ( Maa3 )
MALTabc	maltose transport via ABC system	atp[c] + h2o[c] + malt[e] --> adp[c] + h[c] + malt[c] + pi[c]		MalAEFG ( lp_0175 and lp_0176 and lp_0177 and lp_0178 )	( lp_0175 and lp_0176 and lp_0177 and lp_0178 )	MalAEFG
MALt6	malate symporter	h[e] + mal-L[e] <==> h[c] + mal-L[c]		( MleP1 (lp_0594) ) or ( MleP3 (lp_2829) ) or ( MleP2 (lp_1119) )	( lp_0594 or lp_2829 or lp_1119 )	( MleP1 ) or ( MleP3 ) or ( MleP2 )
MAN6PI	mannose-6-phosphate isomerase	[c] : man6p <==> f6p	5.3.1.8	Pmi (lp_2384)	lp_2384	Pmi
MANpts	D-mannose transport via PEP:Pyr PTS	man[e] + pep[c] --> man6p[c] + pyr[c]		( EII_man ( lp_0576 and lp_0577 and lp_0586 and lp_0587 ) or ( lp_0575 and lp_0576 and lp_0577 ) and Hpr (lp_1273) and PtsI (lp_1274) )	( ( ( lp_0576 and lp_0577 and lp_0586 and lp_0587 ) or ( lp_0575 and lp_0576 and lp_0577 ) ) and lp_1273 and lp_1274 )	( EII_man and Hpr and PtsI )
MCMAT2	Butyryl-[acyl-carrier protein]:malonyl-[acyl-carrier-protein]C-acyltransferase (decarboxylating)	[c] : butacp + h + malacp --> 3oxhacp + acp + co2	2.3.1.41	P_2.3.1.41 (lp_1675)	lp_1675	P_2.3.1.41
MCMAT3	Hexanoyl-[acyl-carrier protein]:malonyl-[acyl-carrier-protein] C-acyltransferase	[c] : h + hexacp + malacp --> 3oxocacp + acp + co2	2.3.1.41	P_2.3.1.41 (lp_1675)	lp_1675	P_2.3.1.41
MCMAT4	Octanoyl-[acyl-carrier protein]:malonyl-[acyl-carrier-protein] C-acyltransferase (decarboxylating)	[c] : h + malacp + octacp --> 3oxdeacp + acp + co2	2.3.1.41	P_2.3.1.41 (lp_1675)	lp_1675	P_2.3.1.41
MCMAT5	Decanoyl-[acyl-carrier protein]:malonyl-[acyl-carrier-protein] C-acyltransferase	[c] : decacp + h + malacp --> 3oxddacp + acp + co2	2.3.1.41	P_2.3.1.41 (lp_1675)	lp_1675	P_2.3.1.41
MCMAT6	Dodecanoyl-[acyl-carrier-protein]:malonyl-[acyl-carrier-protein] C-acyltransferase	[c] : ddeacp + h + malacp --> 3oxtdacp + acp + co2	2.3.1.41	P_2.3.1.41 (lp_1675)	lp_1675	P_2.3.1.41
MCMAT7	Tetradecanoyl-[acyl-carrier-protein]:malonyl-[acyl-carrier-protein] C-acyltransferase	[c] : h + malacp + tdeacp --> 3oxhdacp + acp + co2	2.3.1.41	P_2.3.1.41 (lp_1675)	lp_1675	P_2.3.1.41
MCMAT8	Hexadecanoyl-[acyl-carrier-protein]:malonyl-[acyl-carrier-protein] C-acyltransferase	[c] : h + hdeacp + malacp --> 3oxocdacp + acp + co2	2.3.1.41	P_2.3.1.41 (lp_1675)	lp_1675	P_2.3.1.41
MDH	malate dehydrogenase	[c] : mal-L + nad <==> h + nadh + oaa	1.1.1.37	Mdh (lp_3150)	lp_3150	Mdh
ME1x	malic enzyme (NAD)	[c] : mal-L + nad --> co2 + nadh + pyr	1.1.1.38	Mae (lp_1105)	lp_1105	Mae
MELIBt2	melibiose transport in via symport	h[e] + melib[e] --> h[c] + melib[c]		LacS2 (lp_3486)	lp_3486	LacS2
METACH	O-Acetyl-L-homoserine acetate-lyase (adding methanethiol)	[c] : achms + h2s <==> ac + h + hcys-L	4.2.99.10	MetY (lp_2536)	lp_2536	MetY
METAT	methionine adenosyltransferase	[c] : atp + h2o + met-L --> amet + pi + ppi	2.5.1.6	MetK (lp_1301)	lp_1301	MetK
METFR	methylenetetrahydrofolate reductase (NADPH2)	[c] : 5mthf + nadp <==> (2) h + mlthf + nadph	1.5.1.20
METHALt	Methional transport	methal[c] <==> methal[e]
METS	methionine synthase	[c] : 5mthf + hcys-L --> h + met-L + thf	2.1.1.13	MetH (lp_1374)	lp_1374	MetH
METTA	methionine transaminase	[c] : akg + h + met-L <==> 4met2obut + glu-L
METTRS	Methionyl-tRNA synthetase	[c] : atp + met-L + trnamet --> amp + h + mettrna + ppi	6.1.1.10	MetS (lp_0454)	lp_0454	MetS
METt6	L-methionine transport in/out via proton symport	h[e] + met-L[e] <==> h[c] + met-L[c]
MEVK	mevalonate kinase	[c] : atp + mev-R --> 5pmev + adp + h	2.7.1.36	MvaK1 (lp_1735)	lp_1735	MvaK1
MGDS	Molybdopterin guanine dinucleotide synthase	[c] : Moco + gtp + h --> MGD + h2o + ppi		( MobA (lp_1491) and MobB (lp_1493) )	( lp_1491 and lp_1493 )	( MobA and MobB )
MI1PP	myo-inositol 1-phosphatase	[c] : h2o + mi1p-D --> inost + pi	3.1.3.25	SuhB (lp_2147)	lp_2147	SuhB
MNLpts	mannitol transport via PEP:Pyr PTS	mnl[e] + pep[c] --> mnl1p[c] + pyr[c]		( EII_mnl ( lp_0230 and lp_0232 ) and Hpr (lp_1273) and PtsI (lp_1274) ) or ( Hpr (lp_1273) and PtsI (lp_1274) )	( ( ( lp_0230 and lp_0232 ) and lp_1273 and lp_1274 ) or ( lp_1273 and lp_1274 ) )	( EII_mnl and Hpr and PtsI ) or ( Hpr and PtsI )
MNabc	manganese transport via ABC system	atp[c] + h2o[c] + mn2[e] --> adp[c] + h[c] + mn2[c] + pi[c]		( MntA (lp_1919) ) or ( MtsA (lp_1097) ) or ( MtsB (lp_1096) ) or ( MtsC (lp_1095) )	( lp_1919 or lp_1097 or lp_1096 or lp_1095 )	( MntA ) or ( MtsA ) or ( MtsB ) or ( MtsC )
MOADCST	MoaD:cysteine sulfur transferase	[c] : MCOOH + atp + cys-L + h2o --> MCOSH + amp + ppi + ser-L		( MoaD (lp_1479) and MoeB (lp_1496) and ThiI ( lp_2325 and lp_2326 ) ) or ( IscS ( lp_2179 and lp_2180 ) and MoaD (lp_1479) and MoeB (lp_1496) )	( ( lp_1479 and lp_1496 and ( lp_2325 and lp_2326 ) ) or ( ( lp_2179 and lp_2180 ) and lp_1479 and lp_1496 ) )	( MoaD and MoeB and ThiI ) or ( IscS and MoaD and MoeB )
MOCOS	molybdenum cofactor synthase	[c] : MPT <==> Moco		MoeA (lp_1494)	lp_1494	MoeA
MPTS	molybdopterin synthase	[c] : (2) MCOSH + PreZ + h2o --> (2) MCOOH + MPT + (3) h		( MoaD (lp_1479) and MoaE (lp_1478) )	( lp_1479 and lp_1478 )	( MoaD and MoaE )
MTAN	methylthioadenosine nucleosidase	[c] : 5mta + h2o --> 5mtr + ade	3.2.2.16	Mtn (lp_2181)	lp_2181	Mtn
MTHFC	methenyltetrahydrofolate cyclohydrolase	[c] : h2o + methf <==> 10fthf + h	3.5.4.9	FolD (lp_1599)	lp_1599	FolD
MTHFD	methylenetetrahydrofolate dehydrogenase (NADP)	[c] : mlthf + nadp <==> methf + nadph	1.5.1.5	FolD (lp_1599)	lp_1599	FolD
MTHPTGHM	5-methyltetrahydropteroyltriglutamate-homocysteine S-methyltransferase	[c] : 5mthglu + hcys-L --> met-L + thglu	2.1.1.14	MetE (lp_1375)	lp_1375	MetE
NACUP	Nicotinic acid uptake	nac[e] --> nac[c]
NADH4	NADH dehydrogenase (Menaquinone 7 & no proton)	[c] : h + mqn7 + nadh --> mql7 + nad	1.6.5.3	( Ndh1 (lp_0313) ) or ( Ndh2 (lp_1069) )	( lp_0313 or lp_1069 )	( Ndh1 ) or ( Ndh2 )
NADK	NAD kinase	[c] : atp + nad --> adp + h + nadp	2.7.1.23	PpnK (lp_2222)	lp_2222	PpnK
NADN	NAD nucleosidase	[c] : h2o + nad --> adprib + h + ncam	3.2.2.5
NADS1	NAD synthase (nh4)	[c] : atp + dnad + nh4 --> amp + h + nad + ppi	6.3.1.5	NadE (lp_0566)	lp_0566	NadE
NAPRT	NAPRTase	[c] : h + nac + prpp --> nicrnt + ppi	2.4.2.11	( NatC2 (lp_2771) ) or ( NadC1 (lp_0565) )	( lp_2771 or lp_0565 )	( NatC2 ) or ( NadC1 )
NDPK1	nucleoside-diphosphate kinase (ATP:GDP)	[c] : atp + gdp <==> adp + gtp	2.7.4.6	Ynk1 (lp_0242)	lp_0242	Ynk1
NDPK2	nucleoside-diphosphate kinase (ATP:UDP)	[c] : atp + udp <==> adp + utp	2.7.4.6	Ynk1 (lp_0242)	lp_0242	Ynk1
NDPK3	nucleoside-diphosphate kinase (ATP:CDP)	[c] : atp + cdp <==> adp + ctp	2.7.4.6	Ynk1 (lp_0242)	lp_0242	Ynk1
NDPK4	nucleoside-diphosphate kinase (ATP:dTDP)	[c] : atp + dtdp <==> adp + dttp	2.7.4.6	Ynk1 (lp_0242)	lp_0242	Ynk1
NDPK5	nucleoside-diphosphate kinase (ATP:dGDP)	[c] : atp + dgdp <==> adp + dgtp	2.7.4.6	Ynk1 (lp_0242)	lp_0242	Ynk1
NDPK6	nucleoside-diphosphate kinase (ATP:dUDP)	[c] : atp + dudp <==> adp + dutp	2.7.4.6	Ynk1 (lp_0242)	lp_0242	Ynk1
NDPK7	nucleoside-diphosphate kinase (ATP:dCDP)	[c] : atp + dcdp <==> adp + dctp	2.7.4.6	Ynk1 (lp_0242)	lp_0242	Ynk1
NDPK8	nucleoside-diphosphate kinase (ATP:dADP)	[c] : atp + dadp <==> adp + datp	2.7.4.6	Ynk1 (lp_0242)	lp_0242	Ynk1
NDPK9	nucleoside-diphophate kinase (ATP:IDP)	[c] : atp + idp <==> adp + itp	2.7.4.6	Ynk1 (lp_0242)	lp_0242	Ynk1
NH3t	ammonia transport via diffusion	nh3[e] <==> nh3[c]		AmtB (lp_0349)	lp_0349	AmtB
NH4DIS	nh4 Dissociation	[c] : nh4 <==> h + nh3
NH4DISex	nh4 Dissociation extracellular	[e] : nh4 <==> h + nh3
NNAMr	nicotinamidase, reversible	[c] : h2o + ncam <==> nac + nh4	3.5.1.19	P_3.5.1.19 (lp_2612)	lp_2612	P_3.5.1.19
NNAT	nicotinate-nucleotide adenylyltransferase	[c] : atp + h + nicrnt --> dnad + ppi	2.7.7.18	NadD (lp_1530)	lp_1530	NadD
NO2t3	nitrite transport out via proton antiport	h[e] + no2[c] --> h[c] + no2[e]		NarK (lp_1481)	lp_1481	NarK
NO3abc	nitrate transport via ABC system	atp[c] + h2o[c] + no3[e] --> adp[c] + h[c] + no3[c] + pi[c]		NO3abc ( lp_2076 and lp_2077 )	( lp_2076 and lp_2077 )	NO3abc
NOX1	NADH oxidase (H2O2 forming)	[c] : h + nadh + o2 --> h2o2 + nad		( Nox1 (lp_0760) ) or ( Nox2 (lp_0766) ) or ( Nox3 (lp_1925) ) or ( Nox4 (lp_1941) ) or ( Nox5 (lp_3449) ) or ( Nox6 (lp_1350) )	( lp_0760 or lp_0766 or lp_1925 or lp_1941 or lp_3449 or lp_1350 )	( Nox1 ) or ( Nox2 ) or ( Nox3 ) or ( Nox4 ) or ( Nox5 ) or ( Nox6 )
NOX2	NADH oxidase (H2O forming)	[c] : (2) h + (2) nadh + o2 --> (2) h2o + (2) nad		( Nox1 (lp_0760) ) or ( Nox2 (lp_0766) ) or ( Nox3 (lp_1925) ) or ( Nox4 (lp_1941) ) or ( Nox5 (lp_3449) ) or ( Nox6 (lp_1350) )	( lp_0760 or lp_0766 or lp_1925 or lp_1941 or lp_3449 or lp_1350 )	( Nox1 ) or ( Nox2 ) or ( Nox3 ) or ( Nox4 ) or ( Nox5 ) or ( Nox6 )
NPPDO	2-nitropropane dioxygenase	[c] : (2) n2ppn + o2 --> (2) acetone + (2) h + (2) no2	1.13.11.32	P_1.13.11.32 (lp_0912)	lp_0912	P_1.13.11.32
NPR	NADH peroxidase	[c] : h + h2o2 + nadh --> (2) h2o + nad	1.11.1.1	( Npr2 (lp_2544) ) or ( Npr1 (lp_1445) )	( lp_2544 or lp_1445 )	( Npr2 ) or ( Npr1 )
NTRARx	nitrate reductase (NADH)	[c] : h + nadh + no3 --> h2o + nad + no2	1.7.1.1	NarGHIJ ( lp_1497 and lp_1498 and lp_1499 and lp_1500 )	( lp_1497 and lp_1498 and lp_1499 and lp_1500 )	NarGHIJ
NTRARy	nitrate reductase (NADPH)	[c] : h + nadph + no3 --> h2o + nadp + no2	1.7.1.3	NarGHIJ ( lp_1497 and lp_1498 and lp_1499 and lp_1500 )	( lp_1497 and lp_1498 and lp_1499 and lp_1500 )	NarGHIJ
O2t	O2 transport in via diffusion	o2[e] <==> o2[c]
OCBT	ornithine carbamoyltransferase	[c] : cbp + orn-L <==> citr-L + h + pi	2.1.3.3	ArgF (lp_0532)	lp_0532	ArgF
OCDMAT8	Octadecanoyl-[acyl-carrier protein]:malonyl-CoA C-acyltransferase	[c] : 2tocdacp + h + nadh --> nad + ocdacp	1.3.1.10	FabI (lp_1681)	lp_1681	FabI
OCMAT3	Octanoyl-[acyl-carrier protein]:malonyl-CoA C-acyltransferase	[c] : 2toceacp + h + nadh --> nad + octacp	1.3.1.10	FabI (lp_1681)	lp_1681	FabI
OMPDC	orotidine-5'-phosphate decarboxylase	[c] : h + orot5p --> co2 + ump	4.1.1.23	PyrF (lp_2698)	lp_2698	PyrF
OPHBDC	3-octaprenyl-4-hydroxybenzoate carboxy-lyase	[c] : 3ophb + h --> 2oph + co2		VdcB (lp_0271)	lp_0271	VdcB
ORNTAC	ornithine transacetylase	[c] : acorn + glu-L <==> acglu + orn-L	2.3.1.35	ArgJ (lp_0529)	lp_0529	ArgJ
OROt6	Orotic acid transport in/out via proton symporter	h[e] + orot[e] <==> h[c] + orot[c]
ORPT	orotate phosphoribosyltransferase	[c] : orot5p + ppi <==> orot + prpp	2.4.2.10	PyrE (lp_2697)	lp_2697	PyrE
P5CD	1-pyrroline-5-carboxylate dehydrogenase	[c] : 1pyr5c + (2) h2o + nad --> glu-L + h + nadh	1.5.1.12
P5CRr	pyrroline-5-carboxylate reductase	[c] : 1pyr5c + (2) h + nadph <==> nadp + pro-L	1.5.1.2	ProC (lp_0561)	lp_0561	ProC
PABAt	para aminobenzoic acid transport	4abz[e] <==> 4abz[c]
PACALDt	phenylacetaldehyde transport	pacald[c] <==> pacald[e]
PACTH	phosphonoacetaldehyde hydrolase	[c] : h2o + ppaca --> acald + pi	3.11.1.1	PhnX (lp_0711)	lp_0711	PhnX
PAPPT5	phospho-N-acetylmuramoyl-pentapeptide-transferase (meso-2,6-diaminopimelate)	[c] : udcpp + ugmdalac --> uagmdalac + ump	2.7.8.13	MraY (lp_2199)	lp_2199	MraY
PC	pyruvate carboxylase	[c] : atp + hco3 + pyr --> adp + h + oaa + pi	6.4.1.1	PycA (lp_2136)	lp_2136	PycA
PDE1	3',5'-cyclic-nucleotide phosphodiesterase	[c] : camp + h2o --> amp + h	3.1.4.17	P_3.1.4.17 (lp_3251)	lp_3251	P_3.1.4.17
PDE2	3',5'-cyclic-nucleotide phosphodiesterase	[c] : 35cdamp + h2o --> damp + h	3.1.4.17	P_3.1.4.17 (lp_3251)	lp_3251	P_3.1.4.17
PDE3	3',5'-cyclic-nucleotide phosphodiesterase	[c] : 35cimp + h2o --> h + imp	3.1.4.17	P_3.1.4.17 (lp_3251)	lp_3251	P_3.1.4.17
PDE4	3',5'-cyclic-nucleotide phosphodiesterase	[c] : 35cgmp + h2o --> gmp + h	3.1.4.17	P_3.1.4.17 (lp_3251)	lp_3251	P_3.1.4.17
PDE5	3',5'-cyclic-nucleotide phosphodiesterase	[c] : 35ccmp + h2o --> cmp + h	3.1.4.17	P_3.1.4.17 (lp_3251)	lp_3251	P_3.1.4.17
PDH	pyruvate dehydrogenase	[c] : coa + nad + pyr --> accoa + co2 + nadh	1.2.1.51	( PdhAB ( lp_2153 and lp_2154 ) and PdhC (lp_2152) and PdhD (lp_2151) )	( ( lp_2153 and lp_2154 ) and lp_2152 and lp_2151 )	( PdhAB and PdhC and PdhD )
PDXt2	pyridoxin transport via proton symport	h[e] + pydxn[e] --> h[c] + pydxn[c]
PEAt	phenylethylalcohol transport	pea[c] <==> pea[e]
PFK	phosphofructokinase	[c] : atp + f6p --> adp + fdp + h	2.7.1.11	PfkA (lp_1898)	lp_1898	PfkA
PFL	Formate C-acetyltransferase	[c] : coa + pyr <==> accoa + for	2.3.1.54	( PflA2 (lp_3314) and PflB2 (lp_3313) ) or ( PflA1 (lp_2596) and PflB1 (lp_2598) )	( ( lp_3314 and lp_3313 ) or ( lp_2596 and lp_2598 ) )	( PflA2 and PflB2 ) or ( PflA1 and PflB1 )
PGAMT	phosphoglucosamine mutase	[c] : gam1p <==> gam6p	5.4.2.10	GlmM (lp_0820)	lp_0820	GlmM
PGCD	phosphoglycerate dehydrogenase	[c] : 3pg + nad --> 3php + h + nadh	1.1.1.95	SerA ( lp_0203 ) or ( lp_0785 ) or ( lp_2790 )	( lp_0203 or lp_0785 or lp_2790 )	SerA
PGDH	phosphogluconate dehydrogenase	[c] : 6pgc + nadp --> co2 + nadph + ru5p-D	1.1.1.44	( Gnd2 (lp_1541) ) or ( Gnd1 (lp_1251) )	( lp_1541 or lp_1251 )	( Gnd2 ) or ( Gnd1 )
PGGH	6-phospho-beta-glucosidase	[c] : 6pgg + h2o --> g6p + glc-D	3.2.1.86	( Pbg6 (lp_3011) ) or ( Pbg1 (lp_0440) ) or ( Pbg4 (lp_2777) ) or ( Pbg5 (lp_2778) )	( lp_3011 or lp_0440 or lp_2777 or lp_2778 )	( Pbg6 ) or ( Pbg1 ) or ( Pbg4 ) or ( Pbg5 )
PGGT4	peptidoglycan glycosyltransferase	[c] : uaagmdalac --> PGlac2 + udcpdp		( Pbp1A (lp_1751) and Pbp2A (lp_1413) and Pbp2B2 (lp_2200) ) or ( Pbp1A (lp_1751) and Pbp2A (lp_1413) and Pbp2B1 (lp_1568) )	( ( lp_1751 and lp_1413 and lp_2200 ) or ( lp_1751 and lp_1413 and lp_1568 ) )	( Pbp1A and Pbp2A and Pbp2B2 ) or ( Pbp1A and Pbp2A and Pbp2B1 )
PGI	glucose-6-phosphate isomerase	[c] : g6p <==> f6p	5.3.1.9	Pgi (lp_2502)	lp_2502	Pgi
PGK	phosphoglycerate kinase	[c] : 13dpg + adp <==> 3pg + atp	2.7.2.3	Pgk (lp_0790)	lp_0790	Pgk
PGL	6-phosphogluconolactonase	[c] : 6pgl + h2o --> 6pgc + h	3.1.1.31	Pgl (lp_2219)	lp_2219	Pgl
PGLYCP	phosphoglycolate phosphatase	[c] : 2pglyc + h2o --> glyclt + pi	3.1.3.18	( Gph3 (lp_3544) ) or ( Gph2 (lp_1932) ) or ( Gph1 (lp_0872) )	( lp_3544 or lp_1932 or lp_0872 )	( Gph3 ) or ( Gph2 ) or ( Gph1 )
PGM	phosphoglycerate mutase	[c] : 3pg <==> 2pg	5.4.2.1	( Pgm1 (lp_0205) ) or ( Pgm3 (lp_0900) ) or ( Pgm4 (lp_0901) ) or ( Pgm5 (lp_1785) ) or ( Pgm6 (lp_2170) ) or ( Pgm7 (lp_2785) ) or ( Pgm8 (lp_2868) ) or ( Pgm9 (lp_3170) ) or ( Pgm2 (lp_0597) )	( lp_0205 or lp_0900 or lp_0901 or lp_1785 or lp_2170 or lp_2785 or lp_2868 or lp_3170 or lp_0597 )	( Pgm1 ) or ( Pgm3 ) or ( Pgm4 ) or ( Pgm5 ) or ( Pgm6 ) or ( Pgm7 ) or ( Pgm8 ) or ( Pgm9 ) or ( Pgm2 )
PGMT	phosphoglucomutase	[c] : g1p <==> g6p	5.4.2.2	Pgm (lp_0764)	lp_0764	Pgm
PGMT_B	b-phosphoglucomutase	[c] : g6p-B <==> g1p-B	5.4.2.6	( PgmB1 (lp_0027) ) or ( PgmB2 (lp_0066) )	( lp_0027 or lp_0066 )	( PgmB1 ) or ( PgmB2 )
PGPP_LPL	Phosphatidylglycerol phosphate phosphatase (LPL specific)	[c] : h2o + (0.01) pgp_LPL --> (0.01) pg_LPL + pi	3.1.3.27
PGSA_LPL	Phosphatidylglycerol synthase (LPL specific)	[c] : (0.01) cdpdag_LPL + glyc3p <==> cmp + h + (0.01) pgp_LPL	2.7.8.5	PgsA (lp_2303)	lp_2303	PgsA
PHENt	Phenol transport	phenol[c] <==> phenol[e]
PHETA1	phenylalanine transaminase	[c] : akg + phe-L <==> glu-L + phpyr	2.6.1.58	HisC (lp_2551)	lp_2551	HisC
PHETRS	Phenylalanyl-tRNA synthetase	[c] : atp + phe-L + trnaphe --> amp + h + phetrna + ppi	6.1.1.20	PheST ( lp_1558 and lp_1559 )	( lp_1558 and lp_1559 )	PheST
PHEt6	L-phenylalanine transport in/out via proton symport	h[e] + phe-L[e] <==> h[c] + phe-L[c]
PHLACt	phenyl lactate diffusion	phlac[c] --> phlac[e]
PHLDH	phenyl lactate dehydrogenase	[c] : h + nadh + phpyr <==> nad + phlac
PHPDC	Phenylpyruvate decarboxylase	[c] : h + phpyr --> co2 + pacald	4.1.1.43
PHPYROX	phenylpyruvate oxidation (chemical)	[c] : o2 + phpyr --> bzal + h + oxa
PIabc	phosphate transport via ABC system	atp[c] + h2o[c] + pi[e] --> adp[c] + h[c] + (2) pi[c]		Pst ( lp_0733 and lp_0746 and lp_0747 and lp_0748 and lp_0749 and lp_0750 and lp_0751 )	( lp_0733 and lp_0746 and lp_0747 and lp_0748 and lp_0749 and lp_0750 and lp_0751 )	Pst
PIt6	phosphate transport in/out via proton symporter	h[e] + pi[e] <==> h[c] + pi[c]
PKL	phosphoketolase	[c] : pi + xu5p-D <==> actp + g3p + h2o	4.1.2.9	( Xpk1 (lp_2659) and Xpk2 (lp_3551) )	( lp_2659 and lp_3551 )	( Xpk1 and Xpk2 )
PMANM	phosphomannomutase	[c] : man1p <==> man6p	5.4.2.8	Pgm (lp_0764)	lp_0764	Pgm
PMEVK	phosphomevalonate kinase	[c] : 5pmev + atp --> 5dpmev + adp	2.7.4.2	MvaK2 (lp_1733)	lp_1733	MvaK2
PMPK	phosphomethylpyrimidine kinase	[c] : 4ampm + atp --> 2mahmp + adp	2.7.4.7	ThiD (lp_0114)	lp_0114	ThiD
PNS1	purine nucleosidase (adenosine)	[c] : adn + h2o --> ade + rib-D	3.2.2.1	P_3.2.2.1 ( lp_2591 ) or ( lp_2825 ) or ( lp_0363 )	( lp_2591 or lp_2825 or lp_0363 )	P_3.2.2.1
PNS2	purine nucleosidase (guanosine)	[c] : gsn + h2o --> gua + rib-D	3.2.2.1	P_3.2.2.1 ( lp_2591 ) or ( lp_2825 ) or ( lp_0363 )	( lp_2591 or lp_2825 or lp_0363 )	P_3.2.2.1
PNS3	purine nucleosidase (inosine)	[c] : h2o + ins --> hxan + rib-D	3.2.2.1	P_3.2.2.1 ( lp_2591 ) or ( lp_2825 ) or ( lp_0363 )	( lp_2591 or lp_2825 or lp_0363 )	P_3.2.2.1
PNS4	purine nucleosidase (xanthosine)	[c] : h2o + xtsn --> rib-D + xan	3.2.2.1	P_3.2.2.1 ( lp_2591 ) or ( lp_2825 ) or ( lp_0363 )	( lp_2591 or lp_2825 or lp_0363 )	P_3.2.2.1
PNTK	pantothenate kinase	[c] : atp + pnto-R --> 4ppan + adp + h	2.7.1.33	CoaA (lp_0913)	lp_0913	CoaA
PNTOt2	Pantothenate reversible transport via proton symport	h[e] + pnto-R[e] <==> h[c] + pnto-R[c]
PPA	inorganic diphosphatase	[c] : h2o + ppi --> h + (2) pi	3.6.1.1	PpaC (lp_1837)	lp_1837	PpaC
PPCDC	phosphopantothenoylcysteine decarboxylase	[c] : 4ppcys + h --> co2 + pan4p	4.1.1.36	Dfp (lp_1614)	lp_1614	Dfp
PPCK	phosphoenolpyruvate carboxykinase	[c] : atp + oaa --> adp + co2 + pep	4.1.1.49	Pck (lp_3418)	lp_3418	Pck
PPIK	polyphosphate kinase	[c] : atp + ppi --> adp + pppi	2.7.4.1	Ppk (lp_0842)	lp_0842	Ppk
PPM2	phosphopentomutase (deoxyribose)	[c] : 2dr1p <==> 2dr5p	5.4.2.7
PPN13D	1,3-propanediol dehydrogenase	[c] : 13ppd + nad <==> 3hppnl + h + nadh	1.1.1.202	DhaT (lp_3051)	lp_3051	DhaT
PPNCL	phosphopantothenate-cysteine ligase	[c] : 4ppan + ctp + cys-L --> 4ppcys + cdp + h + pi	6.3.2.5	Dfp (lp_1614)	lp_1614	Dfp
PPND	prephenate dehydrogenase	[c] : nad + pphn --> 34hpp + co2 + nadh	1.3.1.12	TyrA (lp_2034)	lp_2034	TyrA
PPS	phosphoenolpyruvate synthase	[c] : atp + h2o + pyr --> amp + (2) h + pep + pi	2.7.9.2	Pps (lp_1912)	lp_1912	Pps
PRAGS	phosphoribosylglycinamide synthetase	[c] : atp + gly + pram --> adp + gar + h + pi	6.3.4.13	PurD (lp_2719)	lp_2719	PurD
PRAI	phosphoribosylanthranilate isomerase	[c] : pran <==> 2cpr5p	5.3.1.24	TrpF (lp_1656)	lp_1656	TrpF
PRAIS	phosphoribosylaminoimidazole synthetase	[c] : atp + fpram --> adp + air + h + pi	6.3.3.1	PurM (lp_2722)	lp_2722	PurM
PRAMPC	phosphoribosyl-AMP cyclohydrolase	[c] : h + h2o + prbamp --> prfp	3.5.4.19	HisI (lp_2553)	lp_2553	HisI
PRASCS	phosphoribosylaminoimidazolesuccinocarboxamide synthase	[c] : 5aizc + asp-L + atp <==> 25aics + adp + h + pi	6.3.2.6	PurC (lp_2727)	lp_2727	PurC
PRATPP	phosphoribosyl-ATP pyrophosphatase	[c] : h2o + prbatp --> h + ppi + prbamp	3.6.1.31	HisE (lp_2552)	lp_2552	HisE
PRFGS	phosphoribosylformylglycinamidine synthase	[c] : atp + fgam + gln-L + h2o --> adp + fpram + glu-L + (2) h + pi	6.3.5.3	PurLQS ( lp_2724 and lp_2725 and lp_2726 )	( lp_2724 and lp_2725 and lp_2726 )	PurLQS
PRMICI	1-(5-phosphoribosyl)-5-[(5-phosphoribosylamino)methylideneamino)imidazole-4-carboxamide isomerase	[c] : prfp <==> prlp	5.3.1.16	HisA (lp_2556)	lp_2556	HisA
PROTRS	Prolyl-tRNA synthetase	[c] : atp + pro-L + trnapro --> amp + h + ppi + protrna	6.1.1.15	ProS (lp_2048)	lp_2048	ProS
PROTS_LPL_v6.0	protein synthesis_LPL belonging to biomass version 6.0	[c] : (0.125) alatrna + (0.04) argtrna + (0.06) asntrna + (0.06) asptrna + (0.306) atp + (0.011) cystrna + (0.083) glntrna + (0.023) glutrna + (0.084) glytrna + (2) gtp + (2.306) h2o + (0.017) histrna + (0.043) iletrna + (0.078) leutrna + (0.066) lystrna + (0.022) mettrna + (0.034) phetrna + (0.04) protrna + (0.056) sertrna + (0.064) thrtrna + (0.006) trptrna + (0.028) tyrtrna + (0.06) valtrna --…
PROt6	L-proline transport in/out via proton symport	h[e] + pro-L[e] <==> h[c] + pro-L[c]
PRPPS	phosphoribosylpyrophosphate synthetase	[c] : atp + r5p <==> amp + h + prpp	2.7.6.1	( Prs1 (lp_0471) ) or ( Prs2 (lp_2166) )	( lp_0471 or lp_2166 )	( Prs1 ) or ( Prs2 )
PSCVT	3-phosphoshikimate 1-carboxyvinyltransferase	[c] : pep + skm5p <==> 3psme + pi	2.5.1.19	AroE (lp_2035)	lp_2035	AroE
PSERT	phosphoserine transaminase	[c] : 3php + glu-L --> akg + pser-L	2.6.1.52	SerC (lp_0204)	lp_0204	SerC
PSP_L	phosphoserine phosphatase (L-serine)	[c] : h2o + pser-L --> pi + ser-L	3.1.3.3
PSUDS	pseudouridylate synthase	[c] : r5p + ura --> h2o + psd5p	4.2.1.70	P_4.2.1.70 ( lp_1781 ) or ( lp_2653 ) or ( lp_1076 ) or ( lp_1888 ) or ( lp_0963 ) or ( lp_1319 ) or ( lp_2032 ) or ( lp_2221 )	( lp_1781 or lp_2653 or lp_1076 or lp_1888 or lp_0963 or lp_1319 or lp_2032 or lp_2221 )	P_4.2.1.70
PTAr	phosphotransacetylase	[c] : accoa + pi <==> actp + coa	2.3.1.8	Pta (lp_0807)	lp_0807	Pta
PTPAT	pantetheine-phosphate adenylyltransferase	[c] : atp + h + pan4p <==> dpcoa + ppi	2.7.7.3	KdtB (lp_2133)	lp_2133	KdtB
PTRCabc	putrescine transport via ABC system	atp[c] + h2o[c] + ptrc[e] --> adp[c] + h[c] + pi[c] + ptrc[c]		( PotA (lp_0318) and PotB (lp_0317) and PotC (lp_0316) and PotDec (lp_0315) )	( lp_0318 and lp_0317 and lp_0316 and lp_0315 )	( PotA and PotB and PotC and PotDec )
PUNP1	purine-nucleoside phosphorylase (Adenosine)	[c] : adn + pi <==> ade + r1p	2.4.2.1	DeoD (lp_0125)	lp_0125	DeoD
PUNP2	purine-nucleoside phosphorylase (Deoxyadenosine)	[c] : dad-2 + pi <==> 2dr1p + ade	2.4.2.1	DeoD (lp_0125)	lp_0125	DeoD
PUNP3	purine-nucleoside phosphorylase (Guanosine)	[c] : gsn + pi <==> gua + r1p	2.4.2.1	DeoD (lp_0125)	lp_0125	DeoD
PUNP4	purine-nucleoside phosphorylase (Deoxyguanosine)	[c] : dgsn + pi <==> 2dr1p + gua	2.4.2.1	DeoD (lp_0125)	lp_0125	DeoD
PUNP5	purine-nucleoside phosphorylase (Inosine)	[c] : ins + pi <==> hxan + r1p	2.4.2.1	DeoD (lp_0125)	lp_0125	DeoD
PUNP6	purine-nucleoside phosphorylase (Deoxyinosine)	[c] : din + pi <==> 2dr1p + hxan	2.4.2.1	DeoD (lp_0125)	lp_0125	DeoD
PUNP7	purine-nucleoside phosphorylase (Xanthosine)	[c] : pi + xtsn <==> r1p + xan	2.4.2.1	DeoD (lp_0125)	lp_0125	DeoD
PYDAMK	pyridoxal kinase (Pyridoxamine)	[c] : atp + pydam --> adp + h + pyam5p	2.7.1.35	Pdx (lp_0863)	lp_0863	Pdx
PYDAMt	pyridoxamine transport	h[e] + pydam[e] <==> h[c] + pydam[c]
PYDXK	pyridoxal kinase (Pyridoxal)	[c] : atp + pydx --> adp + (2) h + pydx5p	2.7.1.35	Pdx (lp_0863)	lp_0863	Pdx
PYDXPP	Pyridoxal 5-phosphate phosphatase	[c] : h + h2o + pydx5p --> pi + pydx
PYK	pyruvate kinase	[c] : adp + h + pep --> atp + pyr	2.7.1.40	Pyk (lp_1897)	lp_1897	Pyk
PYRNS1	pyrimidine nucleosidase (uridine)	[c] : h2o + uri --> rib-D + ura	3.2.2.8	Lp_3615 (lp_3615)	lp_3615	Lp_3615
PYROX	pyruvate oxidase	[c] : h + o2 + pi + pyr --> actp + co2 + h2o2	1.2.3.3	( Pox4 (lp_3587) ) or ( IlvBN2 (lp_3589) ) or ( Pox3 (lp_2629) ) or ( Pox2 (lp_0852) ) or ( Pox1 (lp_0849) )	( lp_3587 or lp_3589 or lp_2629 or lp_0852 or lp_0849 )	( Pox4 ) or ( IlvBN2 ) or ( Pox3 ) or ( Pox2 ) or ( Pox1 )
PYRt2	pyruvate reversible transport via proton symport	h[e] + pyr[e] <==> h[c] + pyr[c]
PZS	precursor Z synthase	[c] : gtp --> PreZ + ppi		MoaABC ( lp_1480 and lp_1492 and lp_1495 )	( lp_1480 and lp_1492 and lp_1495 )	MoaABC
RAFGH	Raffinose galactohydrolase	[c] : h2o + raffin --> gal + sucr	3.2.1.22	MelA (lp_3485)	lp_3485	MelA
RBFK	riboflavin kinase	[c] : atp + ribflv --> adp + fmn + h	2.7.1.26	( RibC1 (lp_0850) ) or ( RibC2 (lp_2031) )	( lp_0850 or lp_2031 )	( RibC1 ) or ( RibC2 )
RBK	ribokinase	[c] : atp + rib-D --> adp + h + r5p	2.7.1.15	( RbsK3 (lp_3660) ) or ( RbsK1 (lp_0500) ) or ( RbsK2 (lp_2251) )	( lp_3660 or lp_0500 or lp_2251 )	( RbsK3 ) or ( RbsK1 ) or ( RbsK2 )
RBLK1	L-ribulokinase (L-ribulose)	[c] : atp + rbl-L --> adp + h + ru5p-L	2.7.1.16	AraB (lp_3556)	lp_3556	AraB
RBLK2	L-ribulokinase (ribitol)	[c] : atp + rbt --> adp + h + rbt5p	2.7.1.16	AraB (lp_3556)	lp_3556	AraB
RBP4E	L-ribulose-phosphate 4-epimerase	[c] : ru5p-L <==> xu5p-D	5.1.3.4	AraD (lp_3555)	lp_3555	AraD
RBT5PDHy	ribitol-5-phosphate 2-dehydrogenase (NADP)	[c] : nadp + rbt5p <==> h + nadph + ru5p-D	1.1.1.137	Lp_1817 (lp_1817)	lp_1817	Lp_1817
RHC	ribosylhomocysteinase	[c] : h2o + rhcys --> hcys-L + rib-D	3.2.1.148
RIBFLVt2	riboflavin transport in via proton symport	h[e] + ribflv[e] --> h[c] + ribflv[c]
RIBt2	ribose transport in via proton symporter	h[e] + rib-D[e] --> h[c] + rib-D[c]		RbsU (lp_3658)	lp_3658	RbsU
RMI	L-rhamnose isomerase	[c] : rmn <==> rml	5.3.1.14	RhaA (lp_3593)	lp_3593	RhaA
RMK	rhamnulokinase	[c] : atp + rml --> adp + h + rml1p	2.7.1.5	RhaB (lp_3595)	lp_3595	RhaB
RMPA	Rhamnulose-1-phosphate aldolase	[c] : rml1p <==> dhap + lald-L	4.1.2.19	RhaD (lp_3592)	lp_3592	RhaD
RNAS_LPL	RNA synthesis, L.plantarum specific	[c] : (0.66) atp + (0.2) ctp + (0.32) gtp + (0.4) h2o + (0.22) utp --> (0.01) RNA_LPL + (0.4) adp + (0.4) h + (0.4) pi + ppi
RNDR1	ribonucleoside-diphosphate reductase (ADP)	[c] : adp + trdrd --> dadp + h2o + trdox	1.17.4.1	NrdEF ( lp_0692 and lp_0693 )	( lp_0692 and lp_0693 )	NrdEF
RNDR2	ribonucleoside-diphosphate reductase (GDP)	[c] : gdp + trdrd --> dgdp + h2o + trdox	1.17.4.1	NrdEF ( lp_0692 and lp_0693 )	( lp_0692 and lp_0693 )	NrdEF
RNDR3	ribonucleoside-diphosphate reductase (CDP)	[c] : cdp + trdrd --> dcdp + h2o + trdox	1.17.4.1	NrdEF ( lp_0692 and lp_0693 )	( lp_0692 and lp_0693 )	NrdEF
RNDR4	ribonucleoside-diphosphate reductase (UDP)	[c] : trdrd + udp --> dudp + h2o + trdox	1.17.4.1	NrdEF ( lp_0692 and lp_0693 )	( lp_0692 and lp_0693 )	NrdEF
RNTR1	ribonucleoside-triphosphate reductase (ATP)	[c] : atp + trdrd --> datp + h2o + trdox	1.17.4.2	( NrdI (lp_2673) ) or ( NrdD (lp_2932) )	( lp_2673 or lp_2932 )	( NrdI ) or ( NrdD )
RNTR2	ribonucleoside-triphosphate reductase (GTP)	[c] : gtp + trdrd --> dgtp + h2o + trdox	1.17.4.2	( NrdI (lp_2673) ) or ( NrdD (lp_2932) )	( lp_2673 or lp_2932 )	( NrdI ) or ( NrdD )
RNTR3	ribonucleoside-triphosphate reductase (CTP)	[c] : ctp + trdrd --> dctp + h2o + trdox	1.17.4.2	( NrdI (lp_2673) ) or ( NrdD (lp_2932) )	( lp_2673 or lp_2932 )	( NrdI ) or ( NrdD )
RNTR4	ribonucleoside-triphosphate reductase (UTP)	[c] : trdrd + utp --> dutp + h2o + trdox	1.17.4.2	( NrdI (lp_2673) ) or ( NrdD (lp_2932) )	( lp_2673 or lp_2932 )	( NrdI ) or ( NrdD )
RPE	ribulose 5-phosphate 3-epimerase	[c] : ru5p-D <==> xu5p-D	5.1.3.1	Rpe (lp_1621)	lp_1621	Rpe
RPI	ribose-5-phosphate isomerase	[c] : r5p <==> ru5p-D	5.3.1.6	( RpiA2 (lp_0354) ) or ( RpiA1 (lp_0602) )	( lp_0354 or lp_0602 )	( RpiA2 ) or ( RpiA1 )
SADT1	sulfate adenylyltransferase	[c] : atp + h + so4 --> aps + ppi	2.7.7.4	CysD (lp_1378)	lp_1378	CysD
SBT6PP	sorbitol-6-phosphatase	[c] : h2o + sbt6p --> pi + sbt-D
SBTD	L-iditol 2-dehydrogenase	[c] : idt + nad <==> h + nadh + srb-L	1.1.1.14	GutB (lp_3545)	lp_3545	GutB
SBTD_D	D-sorbitol dehydrogenase	[c] : nad + sbt-D --> fru + h + nadh	1.1.1.14	GutB (lp_3545)	lp_3545	GutB
SBTD_L_#1	L-sorbitol dehydrogenase (L-sorbose-producing)	[c] : nad + sbt-L --> h + nadh + srb-L	1.1.1.14	GutB (lp_3545)	lp_3545	GutB
SBTPD	sorbitol-6-phosphate dehydrogenase	[c] : nad + sbt6p <==> f6p + h + nadh	1.1.1.140	( SrlD1 (lp_3623) ) or ( SrlD2 (lp_3657) )	( lp_3623 or lp_3657 )	( SrlD1 ) or ( SrlD2 )
SBTpts	D-sorbitol transport via PEP:Pyr PTS	pep[c] + sbt-D[e] --> pyr[c] + sbt6p[c]		( EII_sbt ( lp_3652 and lp_3653 and lp_3654 ) or ( lp_3618 and lp_3619 and lp_3620 ) and Hpr (lp_1273) and PtsI (lp_1274) )	( ( ( lp_3652 and lp_3653 and lp_3654 ) or ( lp_3618 and lp_3619 and lp_3620 ) ) and lp_1273 and lp_1274 )	( EII_sbt and Hpr and PtsI )
SBTt6	D-sorbitol transport in via proton symport	h[e] + sbt-D[e] <==> h[c] + sbt-D[c]
SDPDS	succinyl-diaminopimelate desuccinylase	[c] : h2o + sl26da --> 26dap-LL + succ	3.5.1.18	( DapE2 (lp_2855) ) or ( DapE1 (lp_1923) )	( lp_2855 or lp_1923 )	( DapE2 ) or ( DapE1 )
SDPTA	succinyldiaminopimelate transaminase	[c] : akg + sl26da <==> glu-L + sl2a6o	2.6.1.17	P_2.6.1.17 (lp_0339)	lp_0339	P_2.6.1.17
SERAT	serine O-acetyltransferase	[c] : accoa + ser-L <==> acser + coa	2.3.1.30	CysE (lp_0254)	lp_0254	CysE
SERD_D	D-serine deaminase	[c] : ser-D --> nh4 + pyr	4.3.1.18	DsdA (lp_2776)	lp_2776	DsdA
SERD_L	L-serine deaminase	[c] : ser-L --> nh4 + pyr	4.3.1.17	SdhAB ( lp_0505 and lp_0506 )	( lp_0505 and lp_0506 )	SdhAB
SERTRS	Seryl-tRNA synthetase	[c] : atp + ser-L + trnaser --> amp + h + ppi + sertrna	6.1.1.11	( SerS2 (lp_1012) ) or ( SerS1 (lp_0501) )	( lp_1012 or lp_0501 )	( SerS2 ) or ( SerS1 )
SERt6	L-serine transport in/out via proton symport	h[e] + ser-L[e] <==> h[c] + ser-L[c]		SdaC (lp_0502)	lp_0502	SdaC
SHK3D	shikimate dehdrogenase	[c] : 3dhsk + h + nadph <==> nadp + skm	1.1.1.25	( AroD1 (lp_1084) ) or ( AroD3 (lp_3498) ) or ( AroD4 (lp_3499) ) or ( AroD2 (lp_3494) )	( lp_1084 or lp_3498 or lp_3499 or lp_3494 )	( AroD1 ) or ( AroD3 ) or ( AroD4 ) or ( AroD2 )
SHKK	shikimate kinase	[c] : atp + skm --> adp + h + skm5p	2.7.1.71	AroI (lp_2033)	lp_2033	AroI
SHSL5	O-acetylhomoserine lysase (L-cysteine)	[c] : achms + cys-L --> ac + cysth-L + h	4.2.99.9	MetB (lp_2634)	lp_2634	MetB
SO4t4	sulfate transport in/out via sodium symport	na1[e] + so4[e] <==> na1[c] + so4[c]		Lp_1385 (lp_1385)	lp_1385	Lp_1385
SPMDabc	spermidine transport via ABC system	atp[c] + h2o[c] + spmd[e] --> adp[c] + h[c] + pi[c] + spmd[c]		( PotA (lp_0318) and PotB (lp_0317) and PotC (lp_0316) and PotDec (lp_0315) )	( lp_0318 and lp_0317 and lp_0316 and lp_0315 )	( PotA and PotB and PotC and PotDec )
SSALx	succinate-semialdehyde dehydrogenase (NAD)	[c] : h2o + nad + sucsal --> (2) h + nadh + succ	1.2.1.16	GabD (lp_3092)	lp_3092	GabD
SSALy	succinate-semialdehyde dehydrogenase (NADP)	[c] : h2o + nadp + sucsal --> (2) h + nadph + succ	1.2.1.16	GabD (lp_3092)	lp_3092	GabD
SUCCt6	succinate transporter in/out via proton symport	h[e] + succ[e] <==> h[c] + succ[c]
SUCD3BC	succinate dehydrogenase (menaquinone 7)	[c] : mqn7 + succ <==> fum + mql7	1.3.5.1	( Lp_0952 (lp_0952) ) or ( Lp_0055 (lp_0055) ) or ( Lp_1425 (lp_1425) ) or ( Lp_3491 (lp_3491) )	( lp_0952 or lp_0055 or lp_1425 or lp_3491 )	( Lp_0952 ) or ( Lp_0055 ) or ( Lp_1425 ) or ( Lp_3491 )
SUCH	alpha-glucoside glucohydrolase	[c] : h2o + sucr --> fru + glc-D	3.2.1.48	Agl4 (lp_3220)	lp_3220	Agl4
SUCpts	sucrose transport via PEP:Pyr PTS	pep[c] + sucr[e] --> pyr[c] + suc6p[c]		( EII_suc ( lp_0185 ) or ( lp_3219 ) and Hpr (lp_1273) and PtsI (lp_1274) ) or ( EII_glc ( lp_3520 and lp_3522 ) and Hpr (lp_1273) and PtsI (lp_1274) )	( ( ( lp_0185 or lp_3219 ) and lp_1273 and lp_1274 ) or ( ( lp_3520 and lp_3522 ) and lp_1273 and lp_1274 ) )	( EII_suc and Hpr and PtsI ) or ( EII_glc and Hpr and PtsI )
TAL	transaldolase	[c] : g3p + s7p <==> e4p + f6p	2.2.1.2	Tal2 (lp_3539)	lp_3539	Tal2
TAPGL4	teichoic acid peptidoglycan ligase	[c] : unRTA --> RTA + udcpp
TARTD	L(+)-tartrate dehydratase	[c] : tartr-L --> h2o + oaa	4.2.1.32	TtdAB ( lp_1089 and lp_1090 )	( lp_1089 and lp_1090 )	TtdAB
TDMAT6	Tetradecanoyl-[acyl-carrier protein]:malonyl-CoA C-acyltransferase	[c] : 2ttdeacp + h + nadh --> nad + tdeacp	1.3.1.10	FabI (lp_1681)	lp_1681	FabI
TDPDRE	dTDP-4-dehydrorhamnose 3,5-epimerase	[c] : dtdpddg <==> dtdpddm	5.1.3.13	RfbC (lp_1188)	lp_1188	RfbC
TDPDRR	dTDP-4-dehydrorhamnose reductase	[c] : dtdp6dm + nadp <==> dtdpddm + h + nadph	1.1.1.133	RfbD (lp_1190)	lp_1190	RfbD
TDPGDH	dTDPglucose 4,6-dehydratase	[c] : dtdpglc --> dtdpddg + h2o	4.2.1.46	RfbB (lp_1189)	lp_1189	RfbB
THDPS	tetrahydropicolinate succinylase	[c] : h2o + succoa + thdp --> coa + sl2a6o	2.3.1.117	DapD (lp_2264)	lp_2264	DapD
THFGLUS	Tetrahydrofolate:L-glutamate gamma-ligase (ADP-forming)	[c] : atp + glu-L + thf <==> adp + h + pi + thfglu	6.3.2.17	( FolC2 (lp_3296) ) or ( FolC1 (lp_2321) )	( lp_3296 or lp_2321 )	( FolC2 ) or ( FolC1 )
THMDt2	thymidine transport in via proton symport	h[e] + thymd[e] --> h[c] + thymd[c]		NupC (lp_3204)	lp_3204	NupC
THMabc	thiamine transport via ABC system	atp[c] + h2o[c] + thm[e] --> adp[c] + h[c] + pi[c] + thm[c]
THRA	threonine aldolase	[c] : thr-L <==> acald + gly	4.1.2.5
THRD_L	L-threonine deaminase	[c] : thr-L --> 2obut + nh4
THRS	threonine synthase	[c] : h2o + phom --> pi + thr-L	4.2.3.1	ThrC (lp_2758)	lp_2758	ThrC
THRTRS	Threonyl-tRNA synthetase	[c] : atp + thr-L + trnathr --> amp + h + ppi + thrtrna	6.1.1.3	ThrS (lp_1514)	lp_1514	ThrS
THRt6	L-threonine transport in/out via proton symporter	h[e] + thr-L[e] <==> h[c] + thr-L[c]
THZPSN2	thiazole phosphate synthesis	[c] : MCOSH + dxyl5p + gly + nadp --> 4mpetz + MCOOH + co2 + (2) h + (2) h2o + nadph		MoaD (lp_1479)	lp_1479	MoaD
TKT1	transketolase	[c] : r5p + xu5p-D <==> g3p + s7p	2.2.1.1	( Tkt4 (lp_3538) ) or ( Tkt2 (lp_1083) ) or ( Tkt3 (lp_3135) )	( lp_3538 or lp_1083 or lp_3135 )	( Tkt4 ) or ( Tkt2 ) or ( Tkt3 )
TKT2	transketolase	[c] : e4p + xu5p-D <==> f6p + g3p	2.2.1.1	( Tkt4 (lp_3538) ) or ( Tkt2 (lp_1083) ) or ( Tkt3 (lp_3135) )	( lp_3538 or lp_1083 or lp_3135 )	( Tkt4 ) or ( Tkt2 ) or ( Tkt3 )
TMDK1	thymidine kinase (ATP:thymidine)	[c] : atp + thymd --> adp + dtmp + h	2.7.1.21	Tdk (lp_2379)	lp_2379	Tdk
TMDK2	thymidine kinase (GTP:Thymidine)	[c] : gtp + thymd --> dtmp + gdp + h	2.7.1.21	Tdk (lp_2379)	lp_2379	Tdk
TMDPK	thiamine diphosphokinase	[c] : atp + thm --> amp + h + thmpp	2.7.6.2	Lp_1622 (lp_1622)	lp_1622	Lp_1622
TMDS	thymidylate synthase	[c] : dump + mlthf --> dhf + dtmp	2.1.1.45	ThyA (lp_1870)	lp_1870	ThyA
TMPKr	thiamine-phosphate kinase	[c] : atp + thmmp <==> adp + thmpp	2.7.4.16
TMPPP	thiamine-phosphate diphosphorylase	[c] : 2mahmp + 4mpetz + h --> ppi + thmmp	2.5.1.3	ThiE (lp_0115)	lp_0115	ThiE
TPI	triose-phosphate isomerase	[c] : dhap <==> g3p	5.3.1.1	TpiA (lp_0791)	lp_0791	TpiA
TPL	tyrosine phenol-lyase	[c] : h2o + tyr-L --> nh4 + phenol + pyr	4.1.99.2
TRDR	thioredoxin reductase (NADPH)	[c] : h + nadph + trdox --> nadp + trdrd	1.8.1.9	( TrxB2 (lp_2585) ) or ( TrxB1 (lp_0761) )	( lp_2585 or lp_0761 )	( TrxB2 ) or ( TrxB1 )
TRE6PH	trehalose-6-phosphate hydrolase	[c] : h2o + tre6p --> g6p + glc-D	3.2.1.93	TreA (lp_0263)	lp_0263	TreA
TREpts	trehalose transport via PEP:Pyr PTS	pep[c] + tre[e] --> pyr[c] + tre6p[c]		( EIIBC_tre ( lp_0264 and lp_0265 ) and Hpr (lp_1273) and PtsI (lp_1274) )	( ( lp_0264 and lp_0265 ) and lp_1273 and lp_1274 )	( EIIBC_tre and Hpr and PtsI )
TRPS1	tryptophan synthase (indoleglycerol phosphate)	[c] : 3ig3p + ser-L --> g3p + h2o + trp-L	4.2.1.20	TrpAB ( lp_1657 ) or ( lp_1658 )	( lp_1657 or lp_1658 )	TrpAB
TRPTRS	Tryptophanyl-tRNA synthetase	[c] : atp + trnatrp + trp-L --> amp + h + ppi + trptrna	6.1.1.2	TrpS (lp_0434)	lp_0434	TrpS
TRPt6	L-tryptophan transport in/out via proton symport	h[e] + trp-L[e] <==> h[c] + trp-L[c]
TYRTA	tyrosine transaminase	[c] : akg + tyr-L <==> 34hpp + glu-L	2.6.1.5	HisC (lp_2551)	lp_2551	HisC
TYRTRS	Tyrosyl-tRNA synthetase	[c] : atp + trnatyr + tyr-L --> amp + h + ppi + tyrtrna	6.1.1.1	TyrS (lp_2807)	lp_2807	TyrS
TYRt6	L-tyrosine transport in/out via proton symport	h[e] + tyr-L[e] <==> h[c] + tyr-L[c]
UAAGDS	UDP-N-acetylmuramoyl-L-alanyl-D-glutamyl-meso-2,6-diaminopimelate synthetase	[c] : 26dap-M + atp + uamag --> adp + h + pi + ugmd	6.3.2.13	MurE1 (lp_0977)	lp_0977	MurE1
UAAGLS1	UDP-N-acetylmuramoyl-L-alanyl-D-glutamate-lysine synthetase (alpha-glutamate)	[c] : atp + lys-L + uamag --> adp + (2) h + pi + uAgl	6.3.2.7	Lp_2380 (lp_2380)	lp_2380	Lp_2380
UAG2E	UDP-N-acetylglucosamine 2-epimerase	[c] : uacgam <==> uacmam	5.1.3.14	Lp_1173 (lp_1173)	lp_1173	Lp_1173
UAGCVT	UDP-N-acetylglucosamine 1-carboxyvinyltransferase	[c] : pep + uacgam --> pi + uaccg	2.5.1.7	( MurA2 (lp_2361) ) or ( MurA1 (lp_0510) )	( lp_2361 or lp_0510 )	( MurA2 ) or ( MurA1 )
UAGDP	UDP-N-acetylglucosamine diphosphorylase	[c] : acgam1p + h + utp --> ppi + uacgam	2.7.7.23	GlmU (lp_0467)	lp_0467	GlmU
UAGPT5	UDP-N-acetylglucosamine-N-acetylmuramyl-(pentapeptide)pyrophosphoryl-undecaprenol N-acetylglucosamine transferase	[c] : uacgam + uagmdalac --> h + uaagmdalac + udp		MurG (lp_2196)	lp_2196	MurG
UAMAGS	UDP-N-acetylmuramoyl-L-alanyl-D-glutamate synthetase	[c] : atp + glu-D + uama --> adp + h + pi + uamag	6.3.2.9	MurD (lp_2197)	lp_2197	MurD
UAMAS	UDP-N-acetylmuramoyl-L-alanine synthetase	[c] : ala-L + atp + uamr --> adp + h + pi + uama	6.3.2.8	MurC (lp_1462)	lp_1462	MurC
UAPGR	UDP-N-acetylenolpyruvoylglucosamine reductase	[c] : h + nadph + uaccg --> nadp + uamr	1.1.1.158	MurB (lp_0814)	lp_0814	MurB
UDCPDP	undecaprenyl-diphosphatase	[c] : h2o + udcpdp --> h + pi + udcpp	3.6.1.27
UDCPDPS	Undecaprenyl diphosphate synthase	[c] : frdp + (8) ipdp --> (8) ppi + udcpdp		( HepB1 (lp_1066) and HepB2 (lp_1134) and UppS (lp_2051) )	( lp_1066 and lp_1134 and lp_2051 )	( HepB1 and HepB2 and UppS )
UDCPK	undecaprenol kinase	[c] : atp + udcp --> adp + h + udcpp	2.7.1.66	BacA (lp_3407)	lp_3407	BacA
UDPG4E	UDPglucose 4-epimerase	[c] : udpg <==> udpgal	5.1.3.2	( GalE1 (lp_0709) ) or ( GalE2 (lp_1200) ) or ( GalE3 (lp_2105) ) or ( GalE4 (lp_3481) )	( lp_0709 or lp_1200 or lp_2105 or lp_3481 )	( GalE1 ) or ( GalE2 ) or ( GalE3 ) or ( GalE4 )
UDPGALM	UDPgalactopyranose mutase	[c] : udpgal --> udpgalfur	5.4.99.9	( Glf1 (lp_1176) ) or ( Glf2 (lp_1219) )	( lp_1176 or lp_1219 )	( Glf1 ) or ( Glf2 )
UGMDDS2	UDP-N-acetylmuramoyl-L-alanyl-D-glutamyl-meso-2,6-diaminopimeloyl-D-alanyl-D-lactate synthetase	[c] : alalac + atp + ugmd --> adp + h + pi + ugmdalac		MurF (lp_0518)	lp_0518	MurF
UNAGAMAMT	N-acetylglucosaminyldiphospho-undecaprenol-N-acetyl-beta-D-mannosaminyltransferase	[c] : uacmam + unaga --> h + udp + unagama	2.4.1.187	TagA (lp_0564)	lp_0564	TagA
UPPRT	uracil phosphoribosyltransferase	[c] : prpp + ura --> ppi + ump	2.4.2.9	Upp (lp_2374)	lp_2374	Upp
URAt2	uracil transport in via proton symport	h[e] + ura[e] --> h[c] + ura[c]		PyrP (lp_2371)	lp_2371	PyrP
URIDK1	uridylate kinase (UMP)	[c] : atp + ump --> adp + udp		PyrH (lp_2053)	lp_2053	PyrH
URIDK2	uridylate kinase (dUMP)	[c] : atp + dump --> adp + dudp		PyrH (lp_2053)	lp_2053	PyrH
URIK1	uridine kinase (ATP:Uridine)	[c] : atp + uri --> adp + h + ump	2.7.1.48	Udk (lp_1562)	lp_1562	Udk
URIK2	uridine kinase (GTP:Uridine)	[c] : gtp + uri --> gdp + h + ump	2.7.1.48	Udk (lp_1562)	lp_1562	Udk
URIK3	uridine kinase (ITP:Uridine)	[c] : itp + uri --> h + idp + ump	2.7.1.48	Udk (lp_1562)	lp_1562	Udk
VALTA	valine transaminase	[c] : akg + val-L <==> 3mob + glu-L	2.6.1.42	IlvE (lp_2390)	lp_2390	IlvE
VALTRS	Valyl-tRNA synthetase	[c] : atp + trnaval + val-L --> amp + h + ppi + valtrna	6.1.1.9	ValS (lp_2322)	lp_2322	ValS
VALabc	L-valine transport via ABC system	atp[c] + h2o[c] + val-L[e] --> adp[c] + h[c] + pi[c] + val-L[c]		LivABCDE ( lp_2981 and lp_2982 and lp_2983 and lp_2984 and lp_2985 )	( lp_2981 and lp_2982 and lp_2983 and lp_2984 and lp_2985 )	LivABCDE
VALt6	L-valine transport in/out via proton symport	h[e] + val-L[e] <==> h[c] + val-L[c]		( Lp_3185 (lp_3185) ) or ( BrnQ1 (lp_0399) ) or ( BrnQ2 (lp_2213) ) or ( BrnQ3 (lp_3466) )	( lp_3185 or lp_0399 or lp_2213 or lp_3466 )	( Lp_3185 ) or ( BrnQ1 ) or ( BrnQ2 ) or ( BrnQ3 )
XANt2	xanthine transport in via proton symport	h[e] + xan[e] --> h[c] + xan[c]		PbuX (lp_2710)	lp_2710	PbuX
XPPT	xanthine phosphoribosyltransferase	[c] : prpp + xan --> ppi + xmp	2.4.2.22	Xpt (lp_1139)	lp_1139	Xpt
YUMPS	yUMP synthetase	[c] : r5p + ura <==> h2o + psd5p	4.2.1.70	P_4.2.1.70 ( lp_1781 ) or ( lp_2653 ) or ( lp_1076 ) or ( lp_1888 ) or ( lp_0963 ) or ( lp_1319 ) or ( lp_2032 ) or ( lp_2221 )	( lp_1781 or lp_2653 or lp_1076 or lp_1888 or lp_0963 or lp_1319 or lp_2032 or lp_2221 )	P_4.2.1.70
biomass_LPL6.0	biomass equation LPL specific	[c] : (0.1294) CPS_LPL2 + (0.000617) DNA_LPL + (0.00013) LTA_LPL + (0.00001) MGD + (0.1462) PGlac2 + (0.00243) PROT_LPL_v6.0 + (0.002784) RNA_LPL + (0.01378) RTAglc + (27.2) atp + (0.00001) btn + (0.000018) clpn_LPL + (0.0002) coa + (27.2) h2o + (0.000164) lyspg_LPL + (0.002) nad + (0.000625) pg_LPL + (0.000001) pydx5p + (0.00001) thf + (0.00001) thmpp + (0.0002) udcpdp --> (27.2) adp + (27.2) h …
kaasIII	beta-ketoacyl-ACP synthase III	[c] : accoa + h + malacp --> aaacp + co2 + coa		( FabH1 (lp_0588) ) or ( FabH2 (lp_1671) )	( lp_0588 or lp_1671 )	( FabH1 ) or ( FabH2 )

## Sheet: compounds v3
abbreviation	officialName	formula	charge	formulaNeutral	KeggID
10fthf	10-Formyltetrahydrofolate	C20H21N7O7	-2	C20H23N7O7	C00234
13dpg	3-Phospho-D-glyceroyl phosphate	C3H4O10P2	-4	C3H8O10P2	C00236
13ppd	Propane-1,3-diol	C3H8O2	0	C3H8O2	C02457
1pyr5c	1-Pyrroline-5-carboxylate	C5H6NO2	-1	C5H7NO2	C03912
23dhdp	2,3-Dihydrodipicolinate	C7H5NO4	-2	C7H7NO4	C03340
25aics	(S)-2-[5-Amino-1-(5-phospho-D-ribosyl)imidazole-4-carboxamido]succinate	C13H15N4O12P	-4	C13H19N4O12P	C04823
26dap-LL	LL-2,6-Diaminoheptanedioate	C7H14N2O4	0	C7H14N2O4	C00666
26dap-M	meso-2,6-Diaminoheptanedioate	C7H14N2O4	0	C7H14N2O4	C00680
2aeppn	(2-Aminoethyl)phosphonate	C2H7NO3P	-1		C03557
2ahbut	(S)-2-Aceto-2-hydroxybutanoate	C6H9O4	-1	C6H10O4	C06006
2ahhmd	2-Amino-4-hydroxy-6-hydroxymethyl-7,8-dihydropteridine diphosphate	C7H8N5O8P2	-3	C7H11N5O8P2	C04807
2ahhmp	2-Amino-4-hydroxy-6-hydroxymethyl-7,8-dihydropteridine	C7H9N5O2	0	C7H9N5O2	C01300
2beacp	But-2-enoyl-[acyl-carrier protein]	C4H4OX	0	C4H4OX	C04246
2c25dho	2-Carboxy-2,5-dihydro-5-oxofuran-2-acetate	C7H6O6	0		C01278
2chdeacp	cis-Hexadec-2-enoyl-[acyl-carrier protein]	C16H28OX	0	C16H28OX
2cocdacp	cis-Octadec-2-enoyl-[acyl-carrier-protein]	C18H32OX	0	C18H32OX
2cpr5p	1-(2-Carboxyphenylamino)-1-deoxy-D-ribulose 5-phosphate	C12H13NO9P	-3	C12H16NO9P	C01302
2dda7p	2-Dehydro-3-deoxy-D-arabino-heptonate 7-phosphate	C7H10O10P	-3	C7H13O10P	C04691
2ddg6p	2-Dehydro-3-deoxy-D-gluconate 6-phosphate	C6H8O9P	-3	C6H11O9P	C04442
2ddglcn	2-Dehydro-3-deoxy-D-gluconate	C6H9O6	-1	C6H10O6	C00204
2dhp	2-Dehydropantoate	C6H9O4	-1	C6H10O4	C00966
2dr1p	2-Deoxy-D-ribose 1-phosphate	C5H9O7P	-2	C5H11O7P	C00672
2dr5p	2-Deoxy-D-ribose 5-phosphate	C5H9O7P	-2	C5H11O7P	C00673
2hxic-L	L-2-hydroxyisocaproate	C6H11O3	-1	C6H12O3
2ins	2-Inosose	C6H10O6	0	C6H10O6	C00691
2mahmp	2-Methyl-4-amino-5-hydroxymethylpyrimidine diphosphate	C6H8N3O7P2	-3	C6H11N3O7P2	C04752
2mba	2-methyl butanoic acid	C5H9O2	-1	C5H10O2
2mbal	2-Methylbutanal	C5H10O	0		C02223
2mbol	2-methylbutanol	C5H12O	0	C5H12O
2mop	2-Methyl-3-oxopropanoate	C4H5O3	-1	C4H6O3	C00349
2mpa	2-methylpropanoic acid	C4H7O2	-1	C4H8O2
2mpal	2-methylpropanal	C4H8O	0	C4H8O
2mpol	2-methylpropanol	C4H10O	0	C4H10O
2obut	2-Oxobutanoate	C4H5O3	-1	C4H6O3	C00109
2oph	2-Octaprenylphenol	C46H70O	0	C46H70O	C05810
2p4c2me	2-phospho-4-(cytidine 5'-diphospho)-2-C-methyl-D-erythritol	C14H22N3O17P3	-4	C14H26N3O17P3	C11436
2pg	D-Glycerate 2-phosphate	C3H4O7P	-3	C3H7O7P	C00631
2pglyc	2-Phosphoglycolate	C2H2O6P	-3	C2H5O6P	C00988
2tddacp	trans-Dodec-2-enoyl-[acyl-carrier protein]	C12H20OX	0	C12H20OX	C05758
2tdeacp	trans-Dec-2-enoyl-[acyl-carrier protein]	C10H16OX	0	C10H16OX	C05754
2thdeacp	trans-Hexadec-2-enoyl-[acyl-carrier protein]	C16H28OX	0	C16H28OX	C05763
2theacp	trans-Hex-2-enoyl-[acp]	C6H8OX	0	C6H8OX	C05748
2tocdacp	trans-Octadec-2-enoyl-[acyl-carrier-protein]	C18H32OX	0	C18H32OX
2toceacp	trans-Oct-2-enoyl-[acp]	C8H12OX	0	C8H12OX	C05751
2ttdeacp	trans-Tetradec-2-enoyl-[acyl-carrier protein]	C14H24OX	0	C14H24OX	C05760
34dhpha	3,4-Dihydroxyphenylacetate	C8H7O4	-1	C8H8O4	C01161
34hplac	(R)-3-(4-Hydroxyphenyl)lactate	C9H9O4	-1
34hpp	3-(4-Hydroxyphenyl)pyruvate	C9H7O4	-1	C9H8O4	C01179
35ccmp	3',5'-Cyclic CMP	C9H11N3O7P	-1	C9H12N3O7P	C00941
35cdamp	3',5'-Cyclic dAMP	C10H11N5O5P	-1	C10H12N5O5P	C00968
35cgmp	3',5'-Cyclic GMP	C10H11N5O7P	-1	C10H12N5O7P	C00942
35cimp	3',5'-Cyclic IMP	C10H10N4O7P	-1	C10H11N4O7P	C00943
3dhq	3-Dehydroquinate	C7H9O6	-1	C7H10O6	C00944
3dhsk	3-Dehydroshikimate	C7H7O5	-1	C7H8O5	C02637
3hbacp	(3R)-3-Hydroxybutanoyl-[acyl-carrier protein]	C4H6O2X	0	C4H6O2X	C04618
3hddacp	(R)-3-Hydroxydodecanoyl-[acyl-carrier protein]	C12H22O2X	0	C12H22O2X	C05757
3hdeacp	(3R)-3-Hydroxydecanoyl-[acyl-carrier protein]	C10H18O2X	0	C10H18O2X	C04619
3hhacp	(R)-3-Hydroxyhexanoyl-[acp]	C6H10O2X	0	C6H10O2X	C05747
3hmp	3-Hydroxy-2-methylpropanoate	C4H7O3	-1	C4H8O3	C01188
3hocacp	(R)-3-Hydroxyoctanoyl-[acyl-carrier protein]	C8H14O2X	0	C8H14O2X	C04620
3hocdacp	(3R)-3-Hydroxyoctadecanoyl-[acyl-carrier protein	C18H34O2X	0	C18H34O2X
3hpaacp	(3R)-3-Hydroxypalmitoyl-[acyl-carrier protein]	C16H30O2X	0	C16H30O2X	C04633
3hppnl	3-Hydroxypropanal	C3H6O2	0	C3H6O2	C00969
3htdacp	(3R)-3-Hydroxytetradecanoyl-[acyl-carrier protein]	C14H26O2X	0	C14H26O2X	C04688
3ig3p	C'-(3-Indolyl)-glycerol 3-phosphate	C11H12NO6P	-2	C11H14NO6P	C03506
3mba	3-methylbutanoic acid	C5H9O2	-1	C5H10O2
3mbal	3-methylbutanal	C5H10O	0	C5H10O
3mbol	3-methylbutanol	C5H12O	0	C5H12O
3mob	3-Methyl-2-oxobutanoate	C5H7O3	-1	C5H8O3	C00141
3mop	(S)-3-Methyl-2-oxopentanoate	C6H9O3	-1	C6H10O3	C00671
3ophb	3-Octaprenyl-4-hydroxybenzoate	C47H69O3	-1	C47H70O3	C05809
3oxddacp	3-Oxododecanoyl-[acyl-carrier protein]	C12H20O2X	0	C12H20O2X	C05756
3oxdeacp	3-Oxodecanoyl-[acyl-carrier protein]	C10H16O2X	0	C10H16O2X	C05753
3oxhacp	3-Oxohexanoyl-[acyl-carrier protein]	C6H8O2X	0	C6H8O2X	C05746
3oxhdacp	3-Oxohexadecanoyl-[acp]	C16H28O2X	0	C16H28O2X	C05762
3oxocacp	3-Oxooctanoyl-[acyl-carrier protein]	C8H12O2X	0	C8H12O2X	C05750
3oxocdacp	3-Oxooctadecanoyl-[acp]	C18H32O2X	0	C18H32O2X
3oxtdacp	3-Oxotetradecanoyl-[acyl-carrier protein]	C14H24O2X	0	C14H24O2X	C05759
3pg	3-Phospho-D-glycerate	C3H4O7P	-3	C3H7O7P	C00197
3php	3-Phosphohydroxypyruvate	C3H2O7P	-3	C3H5O7P	C03232
3psme	5-O-(1-Carboxyvinyl)-3-phosphoshikimate	C10H9O10P	-4	C10H13O10P	C01269
4abut	4-Aminobutanoate	C4H9NO2	0	C4H9NO2	C00334
4abz	4-Aminobenzoate	C7H6NO2	-1	C7H7NO2	C00568
4adcho	4-amino-4-deoxychorismate	C10H10NO5	-1	C10H11NO5	C11355
4ahmmp	4-Amino-5-hydroxymethyl-2-methylpyrimidine	C6H9N3O	0	C6H9N3O	C01279
4ampm	4-Amino-2-methyl-5-phosphomethylpyrimidine	C6H8N3O4P	-2	C6H10N3O4P	C04556
4c2me	4-(cytidine 5'-diphospho)-2-C-methyl-D-erythritol	C14H23N3O14P2	-2	C14H25N3O14P2	C11435
4coum	4-Coumarate	C9H7O3	-1	C9H8O3	C00811
4h2oxg	D-4-Hydroxy-2-oxoglutarate	C5H4O6	-2	C5H6O6	C05946
4hglu	4-Hydroxy-L-glutamate	C5H8NO5	-1	C5H9NO5	C03079
4hphac	4-Hydroxyphenylacetate	C8H7O3	-1	C8H8O3	C00642
4met2obut	4-Methylthio-2-oxobutanoate	C5H8O3S	0		C01180
4mhetz	4-Methyl-5-(2-hydroxyethyl)-thiazole	C6H9NOS	0		C04294
4mop	4-Methyl-2-oxopentanoate	C6H9O3	-1	C6H10O3	C00233
4mpetz	4-Methyl-5-(2-phosphoethyl)-thiazole	C6H8NO4PS	-2	C6H10NO4PS	C04327
4pasp	4-Phospho-L-aspartate	C4H6NO7P	-2	C4H8NO7P	C03082
4ppan	D-4'-Phosphopantothenate	C9H15NO8P	-3	C9H18NO8P	C03492
4ppcys	N-((R)-4-Phosphopantothenoyl)-L-cysteine	C12H20N2O9PS	-3	C12H23N2O9PS	C04352
4vcoum	4-vinyl p-coumaric acid	C8H8O	0	C8H8O
5aizc	5-amino-1-(5-phospho-D-ribosyl)imidazole-4-carboxylate	C9H11N3O9P	-3	C9H14N3O9P	C04751
5dpmev	(R)-5-Diphosphomevalonate	C6H10O10P2	-4	C6H14O10P2	C01143
5fothf	5-Formyltetrahydrofolate	C20H21N7O7	-2	C20H23N7O7	C03479
5mta	5-Methylthioadenosine	C11H15N5O3S	0	C11H15N5O3S	C00170
5mthf	5-Methyltetrahydrofolate	C20H24N7O6	-1	C20H25N7O6	C00440
5mthglu	5-Methyltetrahydropteroyltri-L-glutamate	C25H34N8O12	-2	C25H36N8O12	C04489
5mtr	5-Methylthio-D-ribose	C6H12O4S	0	C6H12O4S	C03089
5odhf2a	5-Oxo-4,5-dihydrofuran-2-acetate	C6H5O4	-1	C6H6O4	C03586
5pmev	(R)-5-Phosphomevalonate	C6H10O7P	-3	C6H13O7P	C01107
6pgc	6-Phospho-D-gluconate	C6H10O10P	-3	C6H13O10P	C00345
6pgg	6-Phospho-beta-D-glucosyl-(1,4)-D-glucose	C12H21O14P	-2	C12H23O14P	C04534
6pgl	6-phospho-D-glucono-1,5-lactone	C6H9O9P	-2	C6H11O9P	C01236
CPS_LPL	capsular polysaccharide linkage unit, LPL specific	C30H59O32P1	-2	C30H61O32P1
CPS_LPL2	capsular polysaccharide linkage unit, LPL specific	C24H47O25P1	-2	C24H49O25P1
DNA_LPL	DNA, LPL specific	C978H1128N372O600P100	-100	C978H1228N372O600P100
LTA_LPL	lipoteichoic acid (n=25, LPL specific)	C12474H24072O14000P2500	0
LTAala_LPL	Lipoteichoic acid (n=25) with 100% D-Ala substitutions (LPL specific)	C19974H39072N2500O16500P2500	0
LTAglc_LPL	Lipoteichoic acid (n=25 with glucose residues, LPL specific)	C27474H49072O26500P2500	-250
MCOOH	MPT synthase small subunit MoaD	MCO2	-1	MHCO2
MCOSH	MPT synthase sulfurylated small subunit (MoaD-SH)	MCHOS	0	MCHOS
MGD	moldybdopterin guanine dinucleotide	C20H22N10O12P2S2	-2
MPT	molybdopterin	C10H12N5O6PS2	-2
Moco	Molybdenum cofactor	C10H12N5O6P1S2	-2
PGlac2	peptidoglycan with D-lac as C-terminal residue to form pentadepsipeptide	C40H62N7O22	-1
PROT_LPL_v6.0	L. plantarum-specific protein composition for biomass version 6.0	C4708H7526N1369O1457S33	23	C4708H7549N1369O1457S33
PreZ	Precursor Z in molybdenum cofactor biosynthesis	C10H11N5O7P	-1
RNA_LPL	RNA, LPL specific	C958H1078N394O696P100	-100	C958H1178N394O696P100
RTA	teichoic acid containing ribitol-P	C144H283N2O193P27	-26	C144H309N2O193P27
RTAala	ribitol teichoic acid (n=25) with D-Ala substitutions	C219H433N27O218P27	-1	C219H434N27O218P27
RTAglc	ribitol teichoic acid (n=25) with glucose substitutions	C294H533N2O318P27	-26	C294H559N2O318P27
a-gal-D	alpha-D galactose	C6H12O6	0	C6H12O6
aaacp	Acetoacetyl-[acyl-carrier protein]	C4H4O2X	0	C4H4O2X	C05744
aacoa	Acetoacetyl-CoA	C25H36N7O18P3S	-4	C25H40N7O18P3S	C00332
ac	Acetate	C2H3O2	-1	C2H4O2	C00033
acald	Acetaldehyde	C2H4O	0	C2H4O	C00084
acamoxm	N-Acetyl-L-2-amino-6-oxopimelate	C9H11NO6	-2	C9H13NO6	C05539
accoa	Acetyl-CoA	C23H34N7O17P3S	-4	C23H38N7O17P3S	C00024
acetone	Acetone	C3H6O	0	C3H6O	C00207
acg5p	N-Acetyl-L-glutamyl 5-phosphate	C7H9NO8P	-3	C7H12NO8P	C04133
acg5sa	N-Acetyl-L-glutamate 5-semialdehyde	C7H10NO4	-1	C7H11NO4	C01250
acgal6p	N-acetylgalactosamine 6-phosphate	C8H14NO9P	-2	C8H16NO9P
acgala	N-Acetyl-D-galactosamine	C8H15NO6	0		C01132
acgam	N-Acetyl-D-glucosamine	C8H15NO6	0	C8H15NO6	C00140
acgam1p	N-Acetyl-D-glucosamine 1-phosphate	C8H14NO9P	-2	C8H16NO9P	C04256
acgam6p	N-Acetyl-D-glucosamine 6-phosphate	C8H14NO9P	-2	C8H16NO9P	C00357
acglu	N-Acetyl-L-glutamate	C7H9NO5	-2	C7H11NO5	C00624
achms	O-Acetyl-L-homoserine	C6H11NO4	0	C6H11NO4	C01077
acmalt	Acetyl-maltose	C14H24O12	0	C14H24O12	C02130
acmam	N-Acetyl-D-muramoate	C11H18NO8	-1	C11H19NO8	C05887
acmama	N-Acetyl-D-muramoyl-L-alanine	C14H23N2O9	-1	C14H24N2O9	C02999
acmana	N-Acetyl-D-mannosamine	C8H15NO6	0	C8H15NO6	C00645
acmanap	N-Acetyl-D-mannosamine 6-phosphate	C8H14NO9P	-2	C8H16NO9P	C04257
acnam	N-Acetylneuraminate	C11H18NO9	-1	C11H19NO9	C00270
acorn	N2-Acetyl-L-ornithine	C7H14N2O3	0	C7H14N2O3	C00437
acp	Acyl-carrier Protein	X	0	X
acser	O-Acetyl-L-serine	C5H9NO4	0	C5H9NO4	C00979
actn-R	(R)-Acetoin	C4H8O2	0		C00810
actp	Acetyl phosphate	C2H3O5P	-2	C2H5O5P	C00227
ade	Adenine	C5H5N5	0	C5H5N5	C00147
adn	Adenosine	C10H13N5O4	0	C10H13N5O4	C00212
adp	ADP	C10H12N5O10P2	-3	C10H15N5O10P2	C00008
adpglc	ADPglucose	C16H23N5O15P2	-2	C16H25N5O15P2	C00498
adprib	ADPribose	C15H21N5O14P2	-2	C15H23N5O14P2	C00301
agly3p_LPL	1-Acyl-sn-glycerol 3-phosphate (Lb plantarum specific)	C2037H3836O700P100	-200	C2037H4036O700P100
ahcys	S-Adenosyl-L-homocysteine	C14H20N6O5S	0	C14H20N6O5S	C00021
ahdt	2-Amino-4-hydroxy-6-(erythro-1,2,3-trihydroxypropyl)dihydropteridine triphosphate	C9H12N5O13P3	-4	C9H16N5O13P3	C04895
aicar	5-Amino-1-(5-Phospho-D-ribosyl)imidazole-4-carboxamide	C9H13N4O8P	-2	C9H15N4O8P	C04677
air	5-amino-1-(5-phospho-D-ribosyl)imidazole	C8H12N3O7P	-2	C8H14N3O7P	C03373
akg	2-Oxoglutarate	C5H4O5	-2	C5H6O5	C00026
al26da	N6-Acetyl-LL-2,6-diaminoheptanedioate	C9H14N2O5	-2	C9H16N2O5
ala-B	beta-Alanine	C3H7NO2	0	C3H7NO2	C00099
ala-D	D-Alanine	C3H7NO2	0	C3H7NO2	C00133
ala-L	L-Alanine	C3H7NO2	0	C3H7NO2	C00041
alac-S	(S)-2-Acetolactate	C5H7O4	-1	C5H8O4	C06010
alalac	D-Alanyl-D-lactate	C6H11NO4	0	C6H11NO4
alatrna	L-Alanyl-tRNA(Ala)	C18H28NO17P2R3	-2		C00886
amet	S-Adenosyl-L-methionine	C15H23N6O5S	1	C15H23N6O5S	C00019
amp	AMP	C10H12N5O7P	-2	C10H14N5O7P	C00020
anth	Anthranilate	C7H6NO2	-1	C7H7NO2	C00108
apoACP	apoprotein [acyl carrier protein]	RHO	0
aps	Adenosine 5'-phosphosulfate	C10H12N5O10PS	-2	C10H14N5O10PS	C00224
arab-L	L-Arabinose	C5H10O5	0		C00259
arg-L	L-Arginine	C6H15N4O2	1	C6H14N4O2	C00062
argsuc	N(omega)-(L-Arginino)succinate	C10H17N4O6	-1	C10H18N4O6	C03406
argtrna	L-Arginyl-tRNA(Arg)	C21H36N4O17P2R3	-1		C02163
asn-L	L-Asparagine	C4H8N2O3	0	C4H8N2O3	C00152
asntrna	L-Asparaginyl-tRNA(Asn)	C19H29N2O18P2R3	-2		C03402
asp-D	D-Aspartate	C4H6NO4	-1	C4H7NO4	C00402
asp-L	L-Aspartate	C4H6NO4	-1	C4H7NO4	C00049
aspsa	L-Aspartate 4-semialdehyde	C4H7NO3	0	C4H7NO3	C00441
asptrna	L-Aspartyl-tRNA(Asp)	C19H27NO19P2R3	-3		C02984
atp	ATP	C10H12N5O13P3	-4	C10H16N5O13P3	C00002
btd-RR	(R,R)-2,3-Butanediol	C4H10O2	0		C03044
btn	Biotin	C10H15N2O3S	-1	C10H16N2O3S	C00120
butacp	Butyryl-[acyl-carrier protein]	C4H6OX	0	C4H6OX	C05745
bzal	Benzaldehyde	C7H6O	0		C00261
camp	cAMP	C10H11N5O6P	-1	C10H12N5O6P	C00575
cbasp	N-Carbamoyl-L-aspartate	C5H6N2O5	-2	C5H8N2O5	C00438
cbp	Carbamoyl phosphate	CH2NO5P	-2	CH4NO5P	C00169
cdp	CDP	C9H12N3O11P2	-3	C9H15N3O11P2	C00112
cdpdag_LPL	CDPdiacylglycerol (LPL specific)	C4674H8172N300O1500P200	-200	C4674H8372N300O1500P200
cdpglyc	CDPglycerol	C12H19N3O13P2	-2	C12H21N3O13P2
cdprbtl	CDPribitol	C14H23N3O15P2	-2	C14H25N3O15P2	C00789
cellb	cellobiose	C12H22O11	0	C12H22O11	C00185
chol	Choline	C5H14NO	1		C00114
chor	Chorismate	C10H8O6	-2	C10H10O6	C00251
cit	Citrate	C6H5O7	-3	C6H8O7	C00158
citr-L	L-Citrulline	C6H13N3O3	0	C6H13N3O3	C00327
clpn_LPL	Cardiolipin (LPL specific)	C7848H14544O1700P200	-200
cmp	CMP	C9H12N3O8P	-2	C9H14N3O8P	C00055
co2	CO2	CO2	0	CO2	C00011
coa	Coenzyme A	C21H32N7O16P3S	-4	C21H36N7O16P3S	C00010
cpocdacp	cyclopropanoyl octadecanoyl-[acyl-carrier protein]	C19H34OX	0	C19H34OX
csn	Cytosine	C4H5N3O	0		C00380
ctp	CTP	C9H12N3O14P3	-4	C9H16N3O14P3	C00063
cys-L	L-Cysteine	C3H7NO2S	0	C3H7NO2S	C00097
cysth-L	L-Cystathionine	C7H14N2O4S	0	C7H14N2O4S	C02291
cystrna	L-Cysteinyl-tRNA(Cys)	C18H28NO17P2SR3	-2		C03125
cytd	Cytidine	C9H13N3O5	0		C00475
dad-2	Deoxyadenosine	C10H13N5O3	0		C00559
dadp	dADP	C10H12N5O9P2	-3	C10H15N5O9P2	C00206
dag_LPL	1,2-Diacylglycerol, LPL specific	C3774H7072O500	0	C3774H7072O500
damp	dAMP	C10H12N5O6P	-2	C10H14N5O6P	C00360
datp	dATP	C10H12N5O12P3	-4	C10H16N5O12P3	C00131
db4p	3,4-dihydroxy-2-butanone 4-phosphate	C4H7O6P	-2	C4H9O6P
dcamp	N6-(1,2-Dicarboxyethyl)-AMP	C14H14N5O11P	-4	C14H18N5O11P	C03794
dcdp	dCDP	C9H12N3O10P2	-3	C9H15N3O10P2	C00705
dcmp	dCMP	C9H12N3O7P	-2	C9H14N3O7P	C00239
dctp	dCTP	C9H12N3O13P3	-4	C9H16N3O13P3	C00458
dcyt	Deoxycytidine	C9H13N3O4	0		C00881
ddeacp	Dodecanoyl-[acyl-carrier protein]	C12H22OX	0	C12H22OX	C05223
decacp	Decanoyl-[acyl-carrier protein]	C10H18OX	0	C10H18OX	C05755
dgdag_LPL	Diglucosyl-diacylglycerol	C4974H9072O1500	0	C4974H9072O1500
dgdp	dGDP	C10H12N5O10P2	-3	C10H15N5O10P2	C00361
dgmp	dGMP	C10H12N5O7P	-2	C10H14N5O7P	C00362
dgsn	Deoxyguanosine	C10H13N5O4	0	C10H13N5O4	C00330
dgtp	dGTP	C10H12N5O13P3	-4	C10H16N5O13P3	C00286
dha	Dihydroxyacetone	C3H6O3	0		C00184
dhap	Dihydroxyacetone phosphate	C3H5O6P	-2	C3H7O6P	C00111
dhf	7,8-Dihydrofolate	C19H19N7O6	-2	C19H21N7O6	C00415
dhnpt	2-Amino-4-hydroxy-6-(D-erythro-1,2,3-trihydroxypropyl)-7,8-dihydropteridine	C9H13N5O4	0		C04874
dhor-S	(S)-Dihydroorotate	C5H5N2O4	-1	C5H6N2O4	C00337
dhpmp	Dihydroneopterin monophosphate	C9H13N5O7P	-1	C9H14N5O7P
dhpt	Dihydropteroate	C14H13N6O3	-1	C14H14N6O3	C00921
diact	Diacetyl	C4H6O2	0	C4H6O2	C00741
dimp	dIMP	C10H12N4O7P	-1	C10H15N4O7P	C06196
din	Deoxyinosine	C10H12N4O4	0		C05512
dmpp	Dimethylallyl diphosphate	C5H9O7P2	-3	C5H12O7P2	C00235
dnad	Deamino-NAD+	C21H24N6O15P2	-2	C21H27N6O15P2	C00857
dpcoa	Dephospho-CoA	C21H33N7O13P2S	-2	C21H35N7O13P2S	C00882
drib	Deoxyribose	C5H10O4	0	C5H10O4	C01801
dtdp	dTDP	C10H13N2O11P2	-3	C10H16N2O11P2	C00363
dtdp6dm	dTDP-6-deoxy-L-mannose	C16H24N2O15P2	-2	C16H26N2O15P2	C03319
dtdpddg	dTDP-4-dehydro-6-deoxy-D-glucose	C16H22N2O15P2	-2	C16H24N2O15P2	C00687
dtdpddm	dTDP-4-dehydro-6-deoxy-L-mannose	C16H22N2O15P2	-2	C16H24N2O15P2	C00688
dtdpglc	dTDPglucose	C16H24N2O16P2	-2	C16H26N2O16P2	C00842
dtmp	dTMP	C10H13N2O8P	-2	C10H15N2O8P	C00364
dttp	dTTP	C10H13N2O14P3	-4	C10H17N2O14P3	C00459
dudp	dUDP	C9H11N2O11P2	-3	C9H14N2O11P2	C01346
dump	dUMP	C9H11N2O8P	-2	C9H13N2O8P	C00365
duri	Deoxyuridine	C9H12N2O5	0		C00526
dutp	dUTP	C9H11N2O14P3	-4	C9H15N2O14P3	C00460
dxyl5p	1-deoxy-D-xylulose 5-phosphate	C5H9O7P	-2	C5H11O7P	C11437
e4p	D-Erythrose 4-phosphate	C4H7O7P	-2	C4H9O7P	C00279
eig3p	D-erythro-1-(Imidazol-4-yl)glycerol 3-phosphate	C6H9N2O6P	-2	C6H11N2O6P	C04666
etha	Ethanolamine	C2H8NO	1	C2H7NO	C00189
etoh	Ethanol	C2H6O	0		C00469
f1p	D-Fructose 1-phosphate	C6H11O9P	-2	C6H13O9P	C02976
f6p	D-Fructose 6-phosphate	C6H11O9P	-2	C6H13O9P	C00085
fad	FAD	C27H31N9O15P2	-2	C27H33N9O15P2	C00016
fdp	D-Fructose 1,6-bisphosphate	C6H10O12P2	-4	C6H14O12P2	C00354
fgam	N2-Formyl-N1-(5-phospho-D-ribosyl)glycinamide	C8H13N2O9P	-2	C8H15N2O9P	C04376
fmet	N-Formyl-L-methionine	C6H10NO3S	-1	C6H11NO3S	C03145
fmn	flavin mononucleotide	C17H19N4O9P	-2	C17H21N4O9P	C00061
fol	Folate	C19H18N7O6	-1	C19H19N7O6	C00504
for	Formate	CH1O2	-1	CH2O2	C00058
fpram	2-(Formamido)-N1-(5-phospho-D-ribosyl)acetamidine	C8H14N3O8P	-2	C8H16N3O8P	C04640
fprica	5-Formamido-1-(5-phospho-D-ribosyl)imidazole-4-carboxamide	C10H13N4O9P	-2	C10H15N4O9P	C04734
frdp	Farnesyl diphosphate	C15H25O7P2	-3	C15H28O7P2	C00448
fru	D-Fructose	C6H12O6	0		C00095
fuc-L	L-Fucose	C6H12O5	0		C01019
fum	Fumarate	C4H2O4	-2	C4H4O4	C00122
g1p	D-Glucose 1-phosphate	C6H11O9P	-2	C6H13O9P	C00103
g1p-B	beta-D-Glucose 1-phosphate	C6H11O9P	-2	C6H13O9P	C00663
g3p	Glyceraldehyde 3-phosphate	C3H5O6P	-2	C3H7O6P	C00661
g3pc	sn-Glycero-3-phosphocholine	C8H20NO6P	0	C8H21NO6P	C00670
g3pe	sn-Glycero-3-phosphoethanolamine	C5H14NO6P	0	C5H14NO6P	C01233
g3pg	Glycerophosphoglycerol	C6H14O8P	-1
g3pi	sn-Glycero-3-phospho-1-inositol	C9H18O11P	-1
g3ps	Glycerophosphoserine	C6H13NO8P	-1	C6H14NO8P
g6p	D-Glucose 6-phosphate	C6H11O9P	-2	C6H13O9P	C00092
g6p-B	beta-D-glucose 6-phosphate	C6H11O9P	-2	C6H13O9P	C01172
gal	D-Galactose	C6H12O6	0		C00124
gal1p	alpha-D-Galactose 1-phosphate	C6H11O9P	-2	C6H13O9P	C00446
galt	Galactitol	C6H14O6	0		C01697
galt1p	Galactitol 1-phosphate	C6H13O9P	-2	C6H15O9P	C06311
gam1p	D-Glucosamine 1-phosphate	C6H13NO8P	-1	C6H14NO8P	C06156
gam6p	D-Glucosamine 6-phosphate	C6H13NO8P	-1	C6H14NO8P	C00352
gar	N1-(5-Phospho-D-ribosyl)glycinamide	C7H14N2O8P	-1	C7H15N2O8P	C03838
gcald	Glycolaldehyde	C2H4O2	0	C2H4O2	C00266
gdp	GDP	C10H12N5O11P2	-3	C10H15N5O11P2	C00035
gdptp	Guanosine 3'-diphosphate 5'-triphosphate	C10H11N5O20P5	-7	C10H18N5O20P5	C04494
glc-D	D-Glucose	C6H12O6	0	C6H12O6	C00031
glcn-D	D-Gluconate	C6H11O7	-1	C6H12O7	C00257
gln-L	L-Glutamine	C5H10N2O3	0	C5H10N2O3	C00064
glntrna	L-Glutaminyl-tRNA(Gln)	C20H31N2O18P2R3	-2	C20H33N2O18P2R3	C02282
glu-D	D-Glutamate	C5H8NO4	-1	C5H9NO4	C00217
glu-L	L-Glutamate	C5H8NO4	-1	C5H9NO4	C00025
glu5p	L-Glutamate 5-phosphate	C5H8NO7P	-2	C5H10NO7P	C03287
glu5sa	L-Glutamate 5-semialdehyde	C5H9NO3	0	C5H9NO3	C01165
glucys	gamma-L-Glutamyl-L-cysteine	C8H13N2O5S	-1	C8H14N2O5S	C00669
glutrna	L-Glutamyl-tRNA(Glu)	C20H29NO19P2R3	-3	C20H32NO19P2R3	C02987
gly	Glycine	C2H5NO2	0	C2H5NO2	C00037
glyald	D-Glyceraldehyde	C3H6O3	0		C00577
glyb	Glycine betaine	C5H11NO2	0	C5H11NO2	C00719
glyc	Glycerol	C3H8O3	0	C3H8O3	C00116
glyc-R	(R)-Glycerate	C3H5O4	-1	C3H6O4	C00258
glyc3p	sn-Glycerol 3-phosphate	C3H7O6P	-2	C3H9O6P	C00093
glyclt	Glycolate	C2H3O3	-1	C2H4O3	C00160
glycogen	glycogen	C6H10O5	0	C6H10O5
glytrna	Glycyl-tRNA(Gly)	C17H26NO17P2R3	-2		C02412
gmp	GMP	C10H12N5O8P	-2	C10H14N5O8P	C00144
grdp	Geranyl diphosphate	C10H17O7P2	-3	C10H20O7P2	C00341
gsn	Guanosine	C10H13N5O5	0		C00387
gthox	Oxidized glutathione	C20H30N6O12S2	-2	C20H32N6O12S2	C00127
gthrd	Reduced glutathione	C10H16N3O6S	-1	C10H17N3O6S	C00051
gtp	GTP	C10H12N5O14P3	-4	C10H16N5O14P3	C00044
gua	Guanine	C5H5N5O	0	C5H5N5O	C00242
h	H+	H	1	H	C00080
h2o	H2O	H2O	0	H2O	C00001
h2o2	Hydrogen peroxide	H2O2	0	H2O2	C00027
h2s	Hydrogen sulfide	H2S	0	H2S	C00283
hco3	Bicarbonate	CHO3	-1	CH2O3	C00288
hcys-L	L-Homocysteine	C4H9NO2S	0	C4H9NO2S	C00155
hdeacp	Hexadecanoyl-[acyl-carrier protein]	C16H30OX	0	C16H30OX	C05764
hexacp	Hexanoyl-[acyl-carrier protein]	C6H10OX	0	C6H10OX	C05749
his-L	L-Histidine	C6H9N3O2	0	C6H9N3O2	C00135
hisp	L-Histidinol phosphate	C6H11N3O4P	-1	C6H12N3O4P	C01100
hista	Histamine	C5H10N3	1		C00388
histd	L-Histidinol	C6H12N3O	1	C6H11N3O	C00860
histrna	L-Histidyl-tRNA(His)	C21H30N3O17P2R3	-2		C02988
hmgcoa	Hydroxymethylglutaryl-CoA	C27H39N7O20P3S	-5	C27H44N7O20P3S	C00356
hom-L	L-Homoserine	C4H9NO3	0	C4H9NO3	C00263
hxan	Hypoxanthine	C5H4N4O	0	C5H4N4O	C00262
idp	IDP	C10H11N4O11P2	-3	C10H14N4O11P2	C00104
idt	L-Iditol	C6H14O6	0		C01507
ile-L	L-Isoleucine	C6H13NO2	0	C6H13NO2	C00407
iletrna	L-Isoleucyl-tRNA(Ile)	C21H34NO17P2R3	-2		C03127
imacp	3-(Imidazol-4-yl)-2-oxopropyl phosphate	C6H8N2O5P	-1	C6H9N2O5P	C01267
imlac	imidazole lactate	C6H7N2O3	-1	C6H8N2O3
imp	IMP	C10H11N4O8P	-2	C10H13N4O8P	C00130
impyr	Imidazole pyruvate	C6H5N2O3	-1	C6H6N2O3
indlac	Indolelactate	C11H11NO3	0		C02043
indpyr	Indolepyruvate	C11H8NO3	-1	C11H9NO3	C00331
inost	myo-Inositol	C6H12O6	0		C00137
ins	Inosine	C10H12N4O5	0		C00294
ipdp	Isopentenyl diphosphate	C5H9O7P2	-3	C5H12O7P2	C00129
itp	ITP	C10H11N4O14P3	-4	C10H15N4O14P3	C00081
lac-D	D-Lactate	C3H5O3	-1	C3H6O3	C00256
lac-L	L-Lactate	C3H5O3	-1	C3H6O3	C00186
lald-L	L-Lactaldehyde	C3H6O2	0		C00424
lcts	Lactose	C12H22O11	0	C12H22O11	C00243
leu-L	L-Leucine	C6H13NO2	0	C6H13NO2	C00123
leutrna	L-Leucyl-tRNA(Leu)	C21H34O17P2R3N	-2	C21H36O17P2R3N	2047
lys-L	L-Lysine	C6H15N2O2	1	C6H14N2O2	C00047
lyspg_LPL	1-lysyl-phosphatidyl glycerol (LPL specific)	C4674H8972N200O1100P100	0	C4674H8972N200O1100P100
lystrna	L-Lysine-tRNA (Lys)	C21H36N2O17P2R3	-1	C21H37N2O17P2R3	C01931
mal-L	L-Malate	C4H4O5	-2	C4H6O5	C00149
malacp	Malonyl-[acyl-carrier protein]	C3HO3X	-1	C3H3O3X	C01209
malcoa	Malonyl-CoA	C24H33N7O19P3S	-5	C24H38N7O19P3S	C00083
malt	Maltose	C12H22O11	0		C00208
man	D-Mannose	C6H12O6	0		C00159
man1p	D-Mannose 1-phosphate	C6H11O9P	-2	C6H13O9P	C03812
man6p	D-Mannose 6-phosphate	C6H11O9P	-2	C6H13O9P	C00275
melib	Melibiose	C12H22O11	0		C05402
mercppyr	Mercaptopyruvate	C3H4O3S	0		C00957
met-L	L-Methionine	C5H11NO2S	0	C5H11NO2S	C00073
methal	Methional	C4H8OS	0
methf	5,10-Methenyltetrahydrofolate	C20H20N7O6	-1	C20H22N7O6	C00445
mettrna	L-Methionyl-tRNA (Met)	C20H32NO17P2SR3	-2	C20H34NO17P2SR3	C02430
mev-R	(R)-Mevalonate	C6H11O4	-1	C6H12O4	C00418
mi1p-D	1D-myo-Inositol 1-phosphate	C6H11O9P	-2		C01177
mlthf	5,10-Methylenetetrahydrofolate	C20H21N7O6	-2	C20H23N7O6	C00143
mn2	Mn2+	Mn	2	Mn	C00034
mnl	D-Mannitol	C6H14O6	0		C00392
mnl1p	D-Mannitol 1-phosphate	C6H13O9P	-2	C6H15O9P	C00644
mql7	Menaquinol 7	C46H66O2	0	C46H66O2
mqn7	Menaquinone 7	C46H64O2	0	C46H64O2
n2ppn	2-Nitropropane	C3H7NO2	0	C3H7NO2	C02116
na1	Sodium	Na	1	Na	C01330
nac	Nicotinate	C6H4NO2	-1	C6H5NO2	C00253
nad	Nicotinamide adenine dinucleotide	C21H26N7O14P2	-1	C21H28N7O14P2	C00003
nadh	Nicotinamide adenine dinucleotide - reduced	C21H27N7O14P2	-2	C21H29N7O14P2	C00004
nadp	Nicotinamide adenine dinucleotide phosphate	C21H25N7O17P3	-3	C21H29N7O17P3	C00006
nadph	Nicotinamide adenine dinucleotide phosphate - reduced	C21H26N7O17P3	-4	C21H30N7O17P3	C00005
ncam	Nicotinamide	C6H6N2O	0	C6H6N2O	C00153
nh3	Ammonia	H3N	0	H3N	C00014
nh4	Ammonium	H4N	1	H3N	C01342
nicrnt	Nicotinate D-ribonucleotide	C11H12NO9P	-2	C11H15NO9P	C01185
no2	Nitrite	NO2	-1	HNO2	C00088
no3	Nitrate	NO3	-1	HNO3	C00244
o2	O2	O2	0	O2	C00007
oaa	Oxaloacetate	C4H2O5	-2	C4H4O5	C00036
ocdacp	Octadecanoyl-[acyl-carrier protein]	C18H34OX	0	C18H34OX
octacp	Octanoyl-[acyl-carrier protein]	C8H14OX	0	C8H14OX	C05752
orn-L	L-Ornithine	C5H13N2O2	1	C5H12N2O2	C01602
orot	Orotate	C5H3N2O4	-1	C5H4N2O4	C00295
orot5p	Orotidine 5'-phosphate	C10H10N2O11P	-3	C10H13N2O11P	C01103
oxa	Oxalate	C2O4	-2	C2H2O4	C00209
pa_LPL	phosphatidic acid (Lb plantarum specific)	C3774H6972O800P100	-200	C3774H7172O800P100
pacald	Phenylacetaldehyde	C8H8O	0		C00601
pan4p	Pantetheine 4'-phosphate	C11H21N2O7PS	-2	C11H23N2O7PS	C01134
pant-R	(R)-Pantoate	C6H11O4	-1	C6H12O4	C00522
pap	Adenosine 3',5'-bisphosphate	C10H11N5O10P2	-4	C10H15N5O10P2	C00054
paps	3'-Phosphoadenylyl sulfate	C10H11N5O13P2S	-4	C10H15N5O13P2S	C00053
pea	Phenylethyl alcohol	C8H10O	0	C8H10O
pep	Phosphoenolpyruvate	C3H2O6P	-3	C3H5O6P	C00074
pg_LPL	Phospatidylglycerol (LPL specific)	C4074H7672O1000P100	-100	C4074H7772O1000P100
pgp_LPL	Phosphatidylglycerophosphate (LPL specific)	C4074H7572O1300P200	-300	C4074H7872O1300P200
phe-L	L-Phenylalanine	C9H11NO2	0	C9H11NO2	C00079
phenol	Phenol	C6H6O	0		C00146
phetrna	L-Phenylalanyl-tRNA(Phe)	C24H32NO17P2R3	-2		C03511
phlac	Phenyl lactate	C9H9O3	-1
phom	O-Phospho-L-homoserine	C4H8NO6P	-2	C4H10NO6P	C01102
phpyr	Phenylpyruvate	C9H7O3	-1	C9H8O3	C00166
pi	Phosphate	HO4P	-2	H3O4P	C00009
pnto-R	(R)-Pantothenate	C9H16NO5	-1	C9H17NO5	C00864
polypi	Polyphosphate	HO3P	0	HO3P	C00890
ppaca	Phosphonoacetaldehyde	C2H3O4P	-2	C2H5O4P	C03167
pphn	Prephenate	C10H8O6	-2	C10H10O6	C00254
ppi	Diphosphate	HO7P2	-3	H4O7P2	C00013
pppi	Inorganic triphosphate	HO10P3	-4	H5O10P3	C03279
pram	5-Phospho-beta-D-ribosylamine	C5H11NO7P	-1	C5H12NO7P	C03090
pran	N-(5-Phospho-D-ribosyl)anthranilate	C12H13NO9P	-3	C12H16NO9P	C04302
prbamp	1-(5-Phosphoribosyl)-AMP	C15H19N5O14P2	-4	C15H23N5O14P2	C02741
prbatp	1-(5-Phosphoribosyl)-ATP	C15H19N5O20P4	-6	C15H25N5O20P4	C02739
prfp	1-(5-Phosphoribosyl)-5-[(5-phosphoribosylamino)methylideneamino]imidazole-4-carboxamide	C15H22N5O15P2	-3	C15H25N5O15P2	C04896
prlp	5-[(5-phospho-1-deoxyribulos-1-ylamino)methylideneamino]-1-(5-phosphoribosyl)imidazole-4-carboxamide	C15H22N5O15P2	-3	C15H25N5O15P2	C04916
pro-L	L-Proline	C5H9NO2	0	C5H9NO2	C00148
protrna	L-Prolyl-tRNA(Pro)	C20H30NO17P2R3	-2		C02702
prpp	5-Phospho-alpha-D-ribose 1-diphosphate	C5H8O14P3	-5	C5H13O14P3	C00119
psd5p	Pseudouridine 5'-phosphate	C9H11N2O9P	-2	C9H13N2O9P	C01168
pser-L	O-Phospho-L-serine	C3H6NO6P	-2	C3H8NO6P	C01005
ptrc	Putrescine	C4H14N2	2	C4H12N2	C00134
pyam5p	Pyridoxamine 5'-phosphate	C8H11N2O5P	-2	C8H13N2O5P	C00647
pydam	Pyridoxamine	C8H12N2O2	0	C8H12N2O2	C00534
pydx	Pyridoxal	C8H9NO3	0		C00250
pydx5p	Pyridoxal 5'-phosphate	C8H7NO6P	-3	C8H10NO6P	C00018
pydxn	Pyridoxine	C8H11NO3	0		C00314
pyr	Pyruvate	C3H3O3	-1	C3H4O3	C00022
r1p	alpha-D-Ribose 1-phosphate	C5H9O8P	-2	C5H11O8P	C00442
r5p	alpha-D-Ribose 5-phosphate	C5H9O8P	-2	C5H11O8P	C00117
raffin	Raffinose	C18H32O16	0		C00492
rbl-L	L-Ribulose	C5H10O5	0	C5H10O5	C00508
rbt	Ribitol	C5H12O5	0	C5H12O5	C00474
rbt5p	D-Ribitol 5-phosphate	C5H11O8P	-2	C5H13O8P	C01068
rhcys	S-Ribosyl-L-homocysteine	C9H17NO6S	0	C9H17NO6S	C03539
rib-D	D-Ribose	C5H10O5	0	C5H10O5	C00121
ribflv	Riboflavin	C17H20N4O6	0	C17H20N4O6	C00255
ribflvRD	Reduced riboflavin	C17H22N4O6	0	C17H22N4O6	C01007
rml	L-Rhamnulose	C6H12O5	0	C6H12O5	C00861
rml1p	L-Rhamnulose 1-phosphate	C6H11O8P	-2	C6H13O8P	C01131
rmn	L-Rhamnose	C6H12O5	0	C6H12O5	C00507
ru5p-D	D-Ribulose 5-phosphate	C5H9O8P	-2	C5H11O8P	C00199
ru5p-L	L-Ribulose 5-phosphate	C5H9O8P	-2	C5H11O8P	C01101
s7p	Sedoheptulose 7-phosphate	C7H13O10P	-2	C7H15O10P	C00281
sbt-D	D-Sorbitol	C6H14O6	0		C00794
sbt-L	L-Sorbitol	C6H14O6	0		C01722
sbt6p	D-Sorbitol 6-phosphate	C6H13O9P	-2	C6H15O9P	C01096
ser-D	D-Serine	C3H7NO3	0	C3H7NO3	C00740
ser-L	L-Serine	C3H7NO3	0	C3H7NO3	C00065
sertrna	L-Seryl-tRNA(Ser)	C18H28NO18P2R3	-2		C02553
skm	Shikimate	C7H9O5	-1	C7H10O5	C00493
skm5p	Shikimate 5-phosphate	C7H8O8P	-3	C7H11O8P	C03175
sl26da	N-Succinyl-LL-2,6-diaminoheptanedioate	C11H16N2O7	-2	C11H18N2O7	C04421
sl2a6o	N-Succinyl-2-L-amino-6-oxoheptanedioate	C11H12NO8	-3	C11H15NO8	C04462
so4	Sulfate	O4S	-2	H2O4S	C00059
spmd	Spermidine	C7H22N3	3	C7H19N3	C00315
srb-L	L-Sorbose	C6H12O6	0		C00247
suc6p	Sucrose 6-phosphate	C12H21O14P	-2	C12H23O14P	C02591
succ	Succinate	C4H4O4	-2	C4H6O4	C00042
succoa	Succinyl-CoA	C25H35N7O19P3S	-5	C25H40N7O19P3S	C00091
sucr	Sucrose	C12H22O11	0		C00089
sucsal	Succinic semialdehyde	C4H5O3	-1	C4H6O3	C00232
tartr-L	L-tartarate	C4H4O6	-2	C4H6O6	C00898
tdeacp	Tetradecanoyl-[acyl-carrier protein]	C14H26OX	0	C14H26OX	C05761
thdp	2,3,4,5-Tetrahydrodipicolinate	C7H7NO4	-2	C7H9NO4	C03972
thf	5,6,7,8-Tetrahydrofolate	C19H21N7O6	-2	C19H23N7O6	C00101
thfglu	Tetrahydrofolyl-[Glu](2)	C24H27N8O9	-3	C24H30N8O9
thglu	Tetrahydropteroyltri-L-glutamate	C24H32N8O12	-2	C24H34N8O12	C04144
thm	Thiamin	C12H17N4OS	1		C00378
thmmp	Thiamin monophosphate	C12H16N4O4PS	-1	C12H18N4O4PS	C01081
thmpp	Thiamine diphosphate	C12H16N4O7P2S	-2	C12H19N4O7P2S	C00068
thr-L	L-Threonine	C4H9NO3	0	C4H9NO3	C00188
thrtrna	L-Threonyl-tRNA(Thr)	C19H30NO18P2R3	-2		C02992
thymd	Thymidine	C10H14N2O5	0	C10H14N2O5	C00214
trdox	Oxidized thioredoxin	X	0	X	C00343
trdrd	Reduced thioredoxin	XH2	0	XH2	C00342
tre	Trehalose	C12H22O11	0	C12H22O11	C01083
tre6p	alpha,alpha'-Trehalose 6-phosphate	C12H21O14P	-2	C12H23O14P	C00689
trnaala	tRNA(Ala)	C15H23O16P2R3	-2		C01635
trnaarg	tRNA(Arg)	C15H23O16P2R3	-2		C01636
trnaasn	tRNA(Asn)	C15H23O16P2R3	-2		C01637
trnaasp	tRNA(Asp)	C15H23O16P2R3	-2		C01638
trnacys	tRNA(Cys)	C15H23O16P2R3	-2		C01639
trnaglu	tRNA (Glu)	C15H23O16P2R3	-2	C15H25O16P2R3	C01641
trnagly	tRNA(Gly)	C15H23O16P2R3	-2		C01642
trnahis	tRNA(His)	C15H23O16P2R3	-2		C01643
trnaile	tRNA(Ile)	C15H23O16P2R3	-2		C01644
trnaleu	tRNA(Leu)	C15H23O16P2R3	-2		C01645
trnalys	tRNA(Lys)	C15H23O16P2R3	-2		C01646
trnamet	tRNA(Met)	C15H23O16P2R3	-2		C01647
trnaphe	tRNA(Phe)	C15H23O16P2R3	-2		C01648
trnapro	tRNA(Pro)	C15H23O16P2R3	-2		C01649
trnaser	tRNA(Ser)	C15H23O16P2R3	-2		C01650
trnathr	tRNA(Thr)	C15H23O16P2R3	-2		C01651
trnatrp	tRNA(Trp)	C15H23O16P2R3	-2		C01652
trnatyr	tRNA(Tyr)	C15H23O16P2R3	-2		C00787
trnaval	tRNA(Val)	C15H23O16P2R3	-2		C01653
trp-L	L-Tryptophan	C11H12N2O2	0	C11H12N2O2	C00078
trptrna	L-Tryptophanyl-tRNA(Trp)	C26H33N2O17P2R3	-2		C03512
tyr-L	L-Tyrosine	C9H11NO3	0	C9H11NO3	C00082
tyrtrna	L-Tyrosyl-tRNA(Tyr)	C24H32NO18P2R3	-2	C24H34NO18P2R3	C02839
uAgl	UDP-N-acetylmuramoyl-L-alanyl-D-glutamyl-L-lysine	C34H51N7O24P2	-4	C34H55N7O24P2	C04700
uaagmdalac	Undecaprenyl-diphospho-N-acetylmuramoyl-(N-acetylglucosamine)-L-alanyl-D-glutamyl-meso-2,6-diaminopimeloyl-D-alanyl-D-lactate	C95H151N7O29P2	-4
uaccg	UDP-N-acetyl-3-O-(1-carboxyvinyl)-D-glucosamine	C20H26N3O19P2	-3	C20H29N3O19P2	C04631
uacgam	UDP-N-acetyl-D-glucosamine	C17H25N3O17P2	-2	C17H27N3O17P2	C00043
uacmam	UDP-N-acetyl-D-mannosamine	C17H25N3O17P2	-2	C17H27N3O17P2	C01170
uagmdalac	Undecaprenyl-diphospho-N-acetylmuramoyl-L-alanyl-D-glutamyl-meso-2,6-diaminopimeloyl-D-alanyl-D-lactate	C87H138N6O24P2	-4
uama	UDP-N-acetylmuramoyl-L-alanine	C23H33N4O20P2	-3	C23H36N4O20P2	C01212
uamag	UDP-N-acetylmuramoyl-L-alanyl-D-glutamate	C28H39N5O23P2	-4	C28H43N5O23P2	C00692
uamr	UDP-N-acetylmuramate	C20H28N3O19P2	-3	C20H31N3O19P2	C01050
udcp	Undecaprenol	C55H90O	0	C55H90O	C01968
udcpdp	Undecaprenyl diphosphate	C55H89O7P2	-3	C55H92O7P2	C03543
udcpp	Undecaprenyl phosphate	C55H89O4P	-2	C55H91O4P	C00348
udp	UDP	C9H11N2O12P2	-3	C9H14N2O12P2	C00015
udpg	UDPglucose	C15H22N2O17P2	-2	C15H24N2O17P2	C00029
udpgal	UDPgalactose	C15H22N2O17P2	-2	C15H24N2O17P2	C00052
udpgalfur	UDP-D-galacto-1,4-furanose	C15H22N2O17P2	-2	C15H24N2O17P2
ugmd	UDP-N-acetylmuramoyl-L-alanyl-D-gamma-glutamyl-meso-2,6-diaminopimelate	C35H51N7O26P2	-4	C35H55N7O26P2	C04877
ugmdalac	UDP-N-acetylmuramoyl-L-alanyl-D-glutamyl-meso-2,6-diaminopimeloyl-D-alanyl-D-lactate	C41H60N8O29P2	-4
ump	UMP	C9H11N2O9P	-2	C9H13N2O9P	C00105
unRTA	undecaprenyl-teichoic acid with ribitol	C199H372N2O197P28	-28	C199H400N2O197P28
unaga	Undecaprenyl diphospho N-acetyl-glucosamine	C63H103NO12P2	-2
unagama	Undecaprenyl-diphospho-N-acetylglucosamine-N-acetylmannosamine	C71H116N2O17P2	-2	C71H118N2O17P2
unagamagp	Undecaprenyl-diphospho-N-acetylglucosamine-N-acetylmannosamine-glycerolphosphate	C74H122N2O22P3	-3	C74H125N2O22P3
ura	Uracil	C4H4N2O2	0	C4H4N2O2	C00106
uri	Uridine	C9H12N2O6	0		C00299
utp	UTP	C9H11N2O15P3	-4	C9H15N2O15P3	C00075
val-L	L-Valine	C5H11NO2	0	C5H11NO2	C00183
valtrna	L-Valyl-tRNA(Val)	C20H32NO17P2R3	-2		C02554
xan	Xanthine	C5H4N4O2	0		C00385
xmp	Xanthosine 5'-phosphate	C10H11N4O9P	-2	C10H13N4O9P	C00655
xtsn	Xanthosine	C10H12N4O6	0		C01762
xu5p-D	D-Xylulose 5-phosphate	C5H9O8P	-2	C5H11O8P	C00231
